# Supplementary material for: Mechanochemical synthesis of aromatic ketones: pyrylium tetrafluoroborate mediated deaminative arylation of amides
Source: Royal Society of Chemistry journal article supplement (doi:10.1039/d4sc00904e), 2024-01-01
Supplement: d4sc00904e1.pdf [file d4sc00904e1.pdf]

## Supporting Information

# Mechanochemical Synthesis of Aromatic Ketones: Pyrylium Tetrafluoroborate Mediated Deaminative Arylation of Amides.

**Satenik Mkrtchyan,<sup>a\*</sup> Oleksandr Shalimov,<sup>b</sup> Michael G. Garcia,<sup>c</sup> Jiří Zapletal,<sup>a</sup> Viktor O. Iaroshenko.<sup>a,d,e,f\*</sup>**

<sup>a</sup>Department of Chemistry, Faculty of Natural Sciences, Matej Bel University, Tajovského 40, 97401, Banská Bystrica, Slovakia.

<sup>b</sup>Department of Heteroatom Chemistry, Institute of Organic Chemistry, National Academy of Sciences of Ukraine, 5 Murmans'ka, 02660 Kyiv, Ukraine.

<sup>c</sup>Department of Biology/Chemistry, Center for Cellular Nanoanalytics (CellNanOs), Universität Osnabrück, Barbarastr. 7, D-49076 Osnabrück, Germany.

<sup>d</sup>Division of Wood Chemistry and Pulp Technology, Department of Fiber and Polymer Technology, School of Chemistry, Biotechnology and Health, KTH Royal Institute of Technology, Teknikringen 56-58, SE-100 44 Stockholm, Sweden.

<sup>e</sup>Functional Materials Group, Gulf University for Science and Technology, Mubarak Al-Abdullah 32093, Kuwait, Kuwait.

<sup>f</sup>Centre of Research Impact and Outcome, Chitkara University Institute of Engineering and Technology, Chitkara University, Rajpura-140401, Punjab, India.

## Table of Contents

|                                                              |     |
|--------------------------------------------------------------|-----|
| (A) Experimental Section.....                                | S3  |
| (A-1) Scope of reagents used.....                            | S3  |
| (A-2) Reaction conditions screening.....                     | S5  |
| (B) Characterization of products.....                        | S9  |
| (C) Copies $^1\text{H}$ and $^{13}\text{C}$ NMR spectra..... | S28 |

# (A) Experimental section.

Commercially available starting materials, reagents, catalysts, anhydrous and degassed solvents were used without further purification. Flash column chromatography was performed with Merck Silica gel 60 (230-400 mesh). The solvents for column chromatography were distilled before the use. Thin layer chromatography was carried out using Merck TLC Silica gel 60 F<sub>254</sub> and visualized by short-wavelength ultraviolet light or by treatment with potassium permanganate (KMnO<sub>4</sub>) stain. <sup>1</sup>H, <sup>13</sup>C and <sup>19</sup>F NMR spectra were recorded on a Bruker 250, 400 and 500 MHz at 20°C. All <sup>1</sup>H NMR spectra are reported in parts per million (ppm) downfield of TMS and were measured relative to the signals for CHCl<sub>3</sub> (7.26 ppm) and DMSO (2.50 ppm). All <sup>13</sup>C{<sup>1</sup>H} NMR spectra were reported in ppm relative to residual CHCl<sub>3</sub> (77.00 ppm) or DMSO (39.70 ppm) and were obtained with <sup>1</sup>H decoupling. Coupling constants, *J*, are reported in Hertz (Hz). Gas chromatographic analyses was performed on Gas Chromatograph Mass Spectrometer GCMS-QP2010 Ultra instrument. Mechanochemical synthesis was performed using the Retsch MM400 mill using the standard kit. Liquid chemicals were dosed using gas tight micro syringes. Isolation of obtained compounds was achieved by column chromatography on Silica gel. All commercially available compounds were purchased from appropriate vendors. The pyrylium tetrafluoroborate is commercially available, we prepared it following previously published literature:

1. Moser, D.; Duan, Y.; Wang, F.; Ma, Y.; O'Neill, M. J.; Cornella, J. *Angew. Chem. Int. Ed.* **2018**, *57*, 11035–11039.
2. Gómez-Palomino, A.; Ghiazza, C.; Busch, J.; Wagner, L.; Cornella, J. *Org. Synth.* **2023**, *100*, 361-381.

## A-1. Scope of reagents used.

**Scheme S1.** List of amides **1** used.

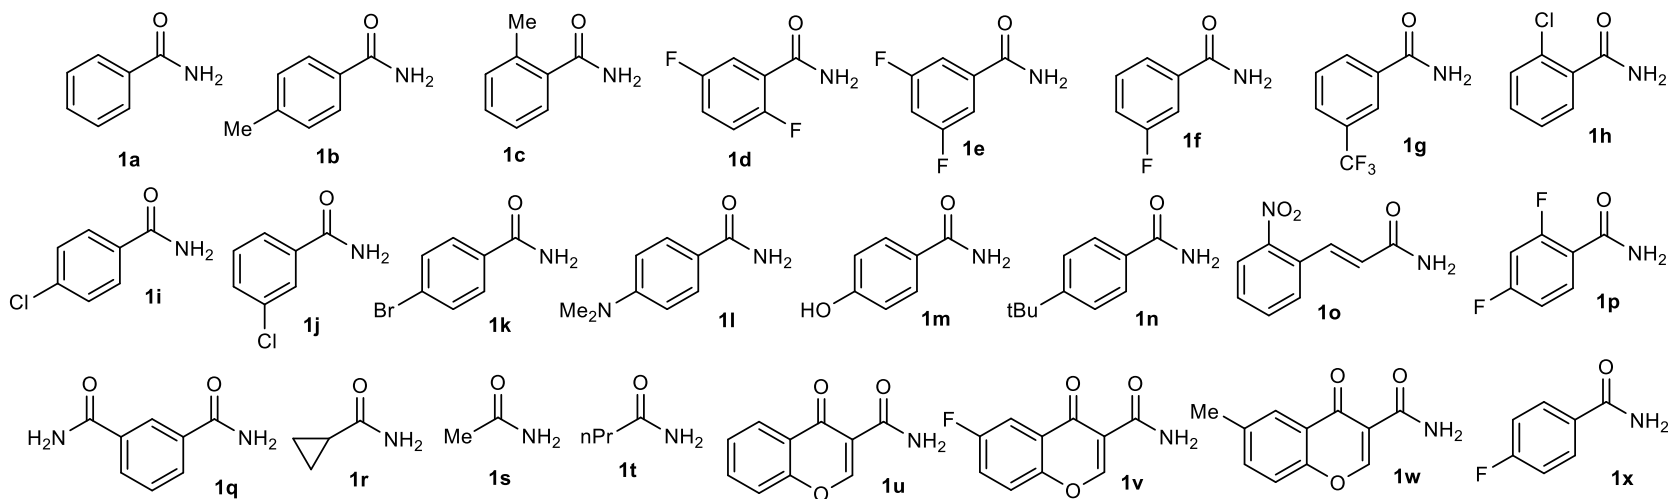

**Scheme S2.** List of aryl boronic acids **4** used.

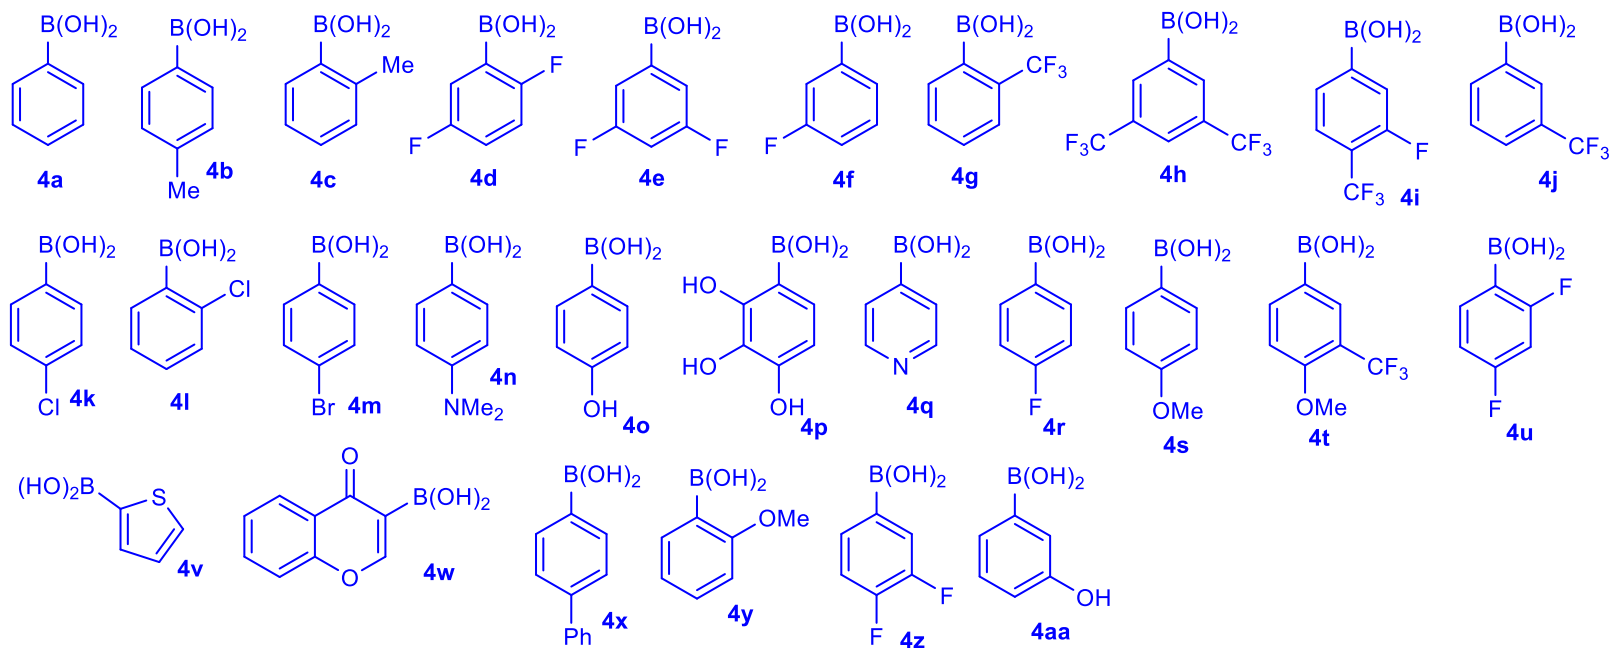

**Scheme S3.** List of aryl trialkoxysilanes **5** used.

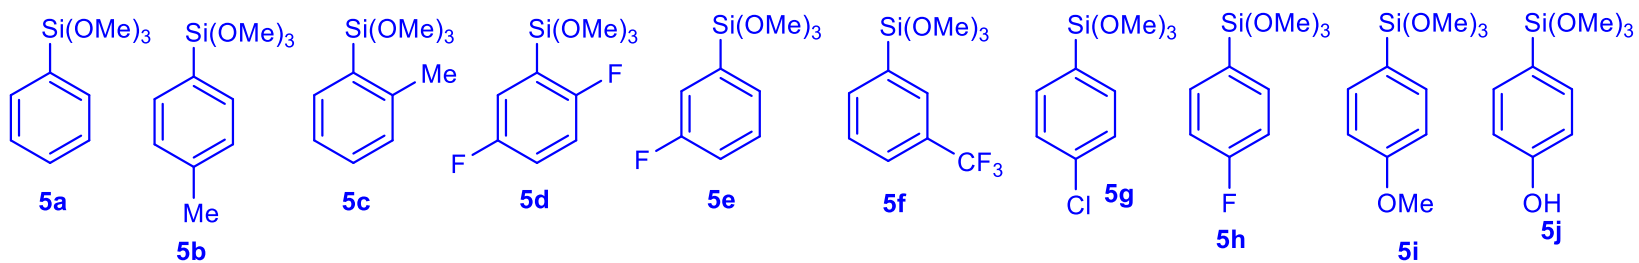

**Scheme S4.** List of urea **6** used.

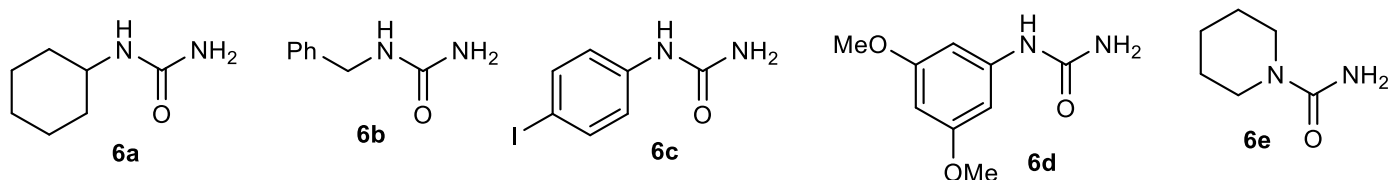

## A-2. Reaction conditions screening.

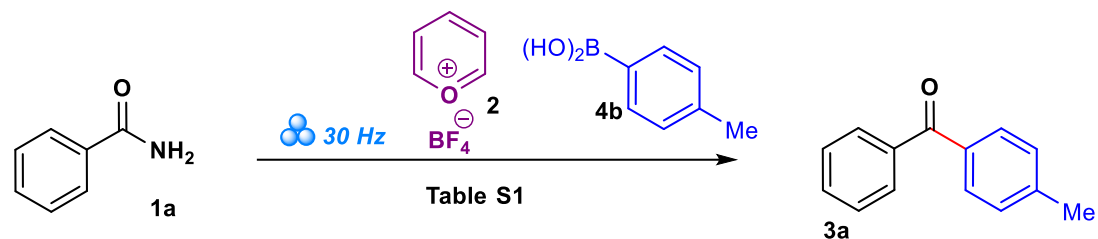

| Table S1                        |                                                                                                                                                    |                        |              |
|---------------------------------|----------------------------------------------------------------------------------------------------------------------------------------------------|------------------------|--------------|
| Entry                           | Reaction components                                                                                                                                | Milling frequency/time | Yield (%) 3a |
| <b>Reactions in solid phase</b> |                                                                                                                                                    |                        |              |
| 1                               | <b>1a</b> (1 equiv.), <b>2</b> (1.1 equiv.), <b>4b</b> (1.3 equiv.)                                                                                | 30Hz/90 min            | 0            |
| 2                               | <b>1a</b> (1 equiv.), <b>2</b> (1.1 equiv.), <b>4b</b> (1.3 equiv.), BaTiO <sub>3</sub> (4 equiv.)                                                 | 30Hz/90 min            | 0            |
| 3                               | <b>1a</b> (1 equiv.), <b>2</b> (1.1 equiv.), <b>4b</b> (1.3 equiv.), Na <sub>2</sub> CO <sub>3</sub> (1.4 equiv.), BaTiO <sub>3</sub> (4 equiv.)   | 30Hz/90 min            | 0            |
| 4                               | <b>1a</b> (1 equiv.), <b>2</b> (1.1 equiv.), <b>4b</b> (1.3 equiv.), K <sub>2</sub> CO <sub>3</sub> (1.4 equiv.), BaTiO <sub>3</sub> (4 equiv.)    | 30Hz/90 min            | 0            |
| 5                               | <b>1a</b> (1 equiv.), <b>2</b> (1.1 equiv.), <b>4b</b> (1.3 equiv.), Cs <sub>2</sub> CO <sub>3</sub> (1.4 equiv.), BaTiO <sub>3</sub> (4 equiv.)   | 30Hz/90 min            | 0            |
| 6                               | <b>1a</b> (1 equiv.), <b>2</b> (1.1 equiv.), <b>4b</b> (1.3 equiv.), NEt <sub>3</sub> (1.4 equiv.), BaTiO <sub>3</sub> (4 equiv.)                  | 30Hz/90 min            | 0            |
| 7                               | <b>1a</b> (1 equiv.), <b>2</b> (1.1 equiv.), <b>4b</b> (1.3 equiv.), NEt <sub>2</sub> Ph (1.4 equiv.), BaTiO <sub>3</sub> (4 equiv.)               | 30Hz/90 min            | 58           |
| 8                               | <b>1a</b> (1 equiv.), <b>2</b> (1.1 equiv.), <b>4b</b> (1.3 equiv.), (iPr) <sub>2</sub> NEt (1.4 equiv.), BaTiO <sub>3</sub> (4 equiv.)            | 30Hz/90 min            | 63           |
| 9                               | <b>1a</b> (1 equiv.), <b>2</b> (1.1 equiv.), <b>4b</b> (1.3 equiv.), Quinuclidine (1.8 equiv.), BaTiO <sub>3</sub> (4 equiv.)                      | 30Hz/90 min            | 90           |
| <b>10</b>                       | <b>1a</b> (1 equiv.), <b>2</b> (1.1 equiv.), <b>4b</b> (1.3 equiv.), <b>DABCO</b> (1.4 equiv.), <b>BaTiO<sub>3</sub></b> (4 equiv.)                | <b>30Hz/90 min</b>     | <b>90</b>    |
| <b>Reactions in solution</b>    |                                                                                                                                                    |                        |              |
| 11                              | <b>1a</b> (1 equiv.), <b>2</b> (1.1 equiv.), <b>4b</b> (1.3 equiv.), DABCO (1.4 equiv.), BaTiO <sub>3</sub> (4 equiv.), MeOH, reflux               | -----/24 h             | 0            |
| 12                              | <b>1a</b> (1 equiv.), <b>2</b> (1.1 equiv.), <b>4b</b> (1.3 equiv.), DABCO (1.4 equiv.), BaTiO <sub>3</sub> (4 equiv.), CH <sub>3</sub> CN, reflux | -----/24 h             | 0            |
| 13                              | <b>1a</b> (1 equiv.), <b>2</b> (1.1 equiv.), <b>4b</b> (1.3 equiv.), DABCO (1.4 equiv.), BaTiO <sub>3</sub> (4 equiv.), 1,4-dioxane, reflux        | -----/24 h             | 0            |
| 14                              | <b>1a</b> (1 equiv.), <b>2</b> (1.1 equiv.), <b>4b</b> (1.3 equiv.), DABCO (1.4 equiv.), BaTiO <sub>3</sub> (4 equiv.), CH <sub>3</sub> CN, reflux | -----/24 h             | 0            |
| 15                              | <b>1a</b> (1 equiv.), <b>2</b> (1.1 equiv.), <b>4b</b> (1.3 equiv.), DABCO (1.4 equiv.), BaTiO <sub>3</sub> (4 equiv.), DMF, 100 °C                | -----/24 h             | 0            |
| 16                              | <b>1a</b> (1 equiv.), <b>2</b> (1.1 equiv.), <b>4b</b> (1.3 equiv.), DABCO (1.4 equiv.), BaTiO <sub>3</sub> (4 equiv.), DMF, 130 °C                | -----/24 h             | 0            |

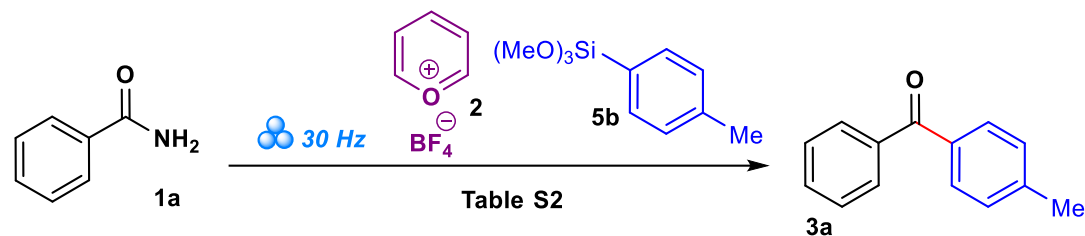

| Table S2                        |                                                                                                                                                    |                        |              |
|---------------------------------|----------------------------------------------------------------------------------------------------------------------------------------------------|------------------------|--------------|
| Entry                           | Reaction components                                                                                                                                | Milling frequency/time | Yield (%) 3a |
| <b>Reactions in solid phase</b> |                                                                                                                                                    |                        |              |
| 1                               | <b>1a</b> (1 equiv.), <b>2</b> (1.1 equiv.), <b>5b</b> (1.3 equiv.)                                                                                | 30Hz/90 min            | 0            |
| 2                               | <b>1a</b> (1 equiv.), <b>2</b> (1.1 equiv.), <b>5b</b> (1.3 equiv.), BaTiO <sub>3</sub> (4 equiv.)                                                 | 30Hz/90 min            | 0            |
| 3                               | <b>1a</b> (1 equiv.), <b>2</b> (1.1 equiv.), <b>5b</b> (1.3 equiv.), Na <sub>2</sub> CO <sub>3</sub> (1.4 equiv.), BaTiO <sub>3</sub> (4 equiv.)   | 30Hz/90 min            | 0            |
| 4                               | <b>1a</b> (1 equiv.), <b>2</b> (1.1 equiv.), <b>5b</b> (1.3 equiv.), K <sub>2</sub> CO <sub>3</sub> (1.4 equiv.), BaTiO <sub>3</sub> (4 equiv.)    | 30Hz/90 min            | 0            |
| 5                               | <b>1a</b> (1 equiv.), <b>2</b> (1.1 equiv.), <b>5b</b> (1.3 equiv.), Cs <sub>2</sub> CO <sub>3</sub> (1.4 equiv.), BaTiO <sub>3</sub> (4 equiv.)   | 30Hz/90 min            | 0            |
| 6                               | <b>1a</b> (1 equiv.), <b>2</b> (1.1 equiv.), <b>5b</b> (1.3 equiv.), NEt <sub>3</sub> (1.4 equiv.), BaTiO <sub>3</sub> (4 equiv.)                  | 30Hz/90 min            | 0            |
| 7                               | <b>1a</b> (1 equiv.), <b>2</b> (1.1 equiv.), <b>5b</b> (1.3 equiv.), NEt <sub>2</sub> Ph (1.4 equiv.), BaTiO <sub>3</sub> (4 equiv.)               | 30Hz/90 min            | 41           |
| 8                               | <b>1a</b> (1 equiv.), <b>2</b> (1.1 equiv.), <b>5a</b> (1.3 equiv.), (iPr) <sub>2</sub> NEt (1.4 equiv.), BaTiO <sub>3</sub> (4 equiv.)            | 30Hz/90 min            | 12           |
| 9                               | <b>1a</b> (1 equiv.), <b>2</b> (1.1 equiv.), <b>5b</b> (1.3 equiv.), Quinuclidine (1.8 equiv.), BaTiO <sub>3</sub> (4 equiv.)                      | 30Hz/90 min            | 52           |
| <b>10</b>                       | <b>1a</b> (1 equiv.), <b>2</b> (1.1 equiv.), <b>5b</b> (1.3 equiv.), <b>DABCO</b> (1.4 equiv.), <b>BaTiO<sub>3</sub></b> (4 equiv.)                | <b>30Hz/90 min</b>     | <b>64</b>    |
| <b>Reactions in solution</b>    |                                                                                                                                                    |                        |              |
| 11                              | <b>1a</b> (1 equiv.), <b>2</b> (1.1 equiv.), <b>5b</b> (1.3 equiv.), DABCO (1.4 equiv.), BaTiO <sub>3</sub> (4 equiv.), MeOH, reflux               | -----/24 h             | 0            |
| 12                              | <b>1a</b> (1 equiv.), <b>2</b> (1.1 equiv.), <b>5b</b> (1.3 equiv.), DABCO (1.4 equiv.), BaTiO <sub>3</sub> (4 equiv.), CH <sub>3</sub> CN, reflux | -----/24 h             | 0            |
| 13                              | <b>1a</b> (1 equiv.), <b>2</b> (1.1 equiv.), <b>5b</b> (1.3 equiv.), DABCO (1.4 equiv.), BaTiO <sub>3</sub> (4 equiv.), 1,4-dioxane, reflux        | -----/24 h             | 0            |
| 14                              | <b>1a</b> (1 equiv.), <b>2</b> (1.1 equiv.), <b>5b</b> (1.3 equiv.), DABCO (1.4 equiv.), BaTiO <sub>3</sub> (4 equiv.), THF, reflux                | -----/24 h             | 0            |
| 15                              | <b>1a</b> (1 equiv.), <b>2</b> (1.1 equiv.), <b>5b</b> (1.3 equiv.), DABCO (1.4 equiv.), BaTiO <sub>3</sub> (4 equiv.), DMF, 100 °C                | -----/24 h             | 0            |
| 16                              | <b>1a</b> (1 equiv.), <b>2</b> (1.1 equiv.), <b>5b</b> (1.3 equiv.), DABCO (1.4 equiv.), BaTiO <sub>3</sub> (4 equiv.), DMF, 130 °C                | -----/24 h             | 0            |

## Reaction procedure with optimised reaction conditions.

### General procedure for the in-solution attempts:

**With aryl boronic acids:** Inside a glovebox, starting amide (1 mmol, 1 equiv.), pyrylium tetrafluoroborate **2** (185 mg, 1.1 mmol, 1.1 equiv.), BaTiO<sub>3</sub> (933 mg, 4 mmol, 4 equiv) and an appropriate aryl boronic acid (1.3 mmol, 1.3 equiv.), freshly sublimated DABCO (157 mg, 1.4 mmol, 1.4 equiv.) were weighed and placed successively into an Ace Pressure Tube equipped with a magnetic stir bar. Finally, 12 mL of dry methanol (or other solvents)

were added inside the glovebox, then the reaction vessel was capped with a stopper. Subsequently, the Pressure Tube was taken out of the glovebox and heated at appropriate temperature. Upon completion, the reaction mixture was cooled to room temperature and analysed by TLC and GS MS. Finally, the reaction mixture was concentrated under vacuum, the formed crude was washed with water, filtrated and dried. The residue was subjected to preparative column chromatography on Silica gel using hexane/ethyl acetate mixtures.

**With aryl trialkoxysilanes:** Inside a glovebox, starting amide (1 mmol, 1 equiv.), pyrylium tetrafluoroborate **2** (1.1 mmol, 1.1 equiv., 185 mg), BaTiO<sub>3</sub> (4 mmol, 4 equiv., 933 mg) and an appropriate aryl trialkoxysilane (1.3 mmol, 1.3 equiv.), freshly sublimated DABCO (1.4 mmol, 1.4 equiv., 157 mg) were weighed and placed successively into an Ace Pressure Tube equipped with a magnetic stir bar. Finally, 12 mL of dry methanol (or other solvents) were added inside the glovebox, then the reaction vessel was capped with a stopper. Subsequently, the Pressure Tube was taken out of the glovebox and heated at appropriate temperature. Upon completion, the reaction mixture was cooled to room temperature and analysed by TLC and GS MS. Finally, the reaction mixture was concentrated under vacuum, the formed crude was washed with water, filtrated and dried. The residue was subjected to preparative column chromatography on Silica gel using hexane/ethyl acetate mixtures.

#### **General procedure for the solid-state synthesis:**

##### ***General procedure for the solid-state synthesis of ketones 3 starting from boronic acids 4.***

Inside a glovebox, a stainless steel 5 mL grinding vessel equipped with three balls (stainless steel,  $\Phi=5$  mm) was loaded consecutively with an appropriate amide (1 mmol, 1 equiv.), pyrylium tetrafluoroborate **2** (185 mg, 1.1 mmol, 1.1 equiv.), BaTiO<sub>3</sub> (933 mg, 4 mmol, 4 equiv.) and an appropriate aryl boronic acid (1.3 mmol, 1.3 equiv.), freshly sublimated DABCO (157 mg, 1.4 mmol, 1.4 equiv.). Lastly, freshly distilled 1,4-dioxane (0.25 mL) was added and the reaction vessel was properly sealed. The reaction vessel was installed on the ball mill outside the glovebox and the content was pulverized at 30Hz for 90 minutes. After completion of the reaction, the content of the vessel was directly subjected to flash column chromatography on silica gel to isolate the desired compound using gradient elution.

The gram scale synthesis was performed with 10 mmol of the starting amine in 25 mL grinding vessel using four balls  $\Phi=10$  mm balls.

##### ***General procedure for the solid-state synthesis of ketones 3 starting from aryl trialkoxysilane 5.***

Inside a glovebox, a stainless steel 5 mL grinding vessel equipped with three balls (stainless steel,  $\Phi=5$  mm) was loaded consecutively with an appropriate amide (1 mmol, 1 equiv.), pyrylium tetrafluoroborate **2** (185 mg, 1.1 mmol, 1.1 equiv.), BaTiO<sub>3</sub> (933 mg, 4 mmol, 4 equiv.) and an appropriate aryl trialkoxysilane (1.3 mmol, 1.3 equiv.), freshly sublimated DABCO (157 mg, 1.4 mmol, 1.4 equiv.). Lastly, freshly distilled 1,4-dioxane (0.25 mL) was added and the reaction vessel was properly sealed. The reaction vessel was installed on the ball mill outside the glovebox and the content was pulverized at 30Hz for 90 minutes. After completion of the reaction, the content of the vessel was directly subjected to flash column chromatography on silica gel to isolate the desired compound using gradient elution.

The gram scale synthesis was performed with 10 mmol of the starting amine in 25 mL grinding vessel four balls  $\Phi=10$  mm balls.

***General procedure for the solid-state synthesis of amides 7 starting from urea 6.***

Inside a glovebox, a stainless steel 5 mL grinding vessel equipped with three balls (stainless steel,  $\Phi=5$  mm) was loaded consecutively with an appropriate urea (1 mmol, 1 equiv.), pyrylium tetrafluoroborate **2** (185 mg, 1.1 mmol, 1.1 equiv.), BaTiO<sub>3</sub> (933 mg, 4 mmol, 4 equiv.) and an appropriate aryl boronic acid (1.3 mmol, 1.3 equiv.), freshly sublimated DABCO (157 mg, 1.4 mmol, 1.4 equiv.). Lastly, freshly distilled 1,4-dioxane (0.25 mL) was added and the reaction vessel was properly sealed. The reaction vessel was installed on the ball mill outside the glovebox and the content was pulverized at 30Hz for 90 minutes. After completion of the reaction, the content of the vessel was directly subjected to flash column chromatography on silica gel to isolate the desired compound using gradient elution.

The gram scale synthesis was performed with 10 mmol of the starting amine in 25 mL grinding vessel using four balls  $\Phi=10$  mm balls.

***General procedure for the solid-state synthesis of amide 3k starting from pyridinium salt 9 and boronic acid 4k.***

Inside a glovebox, a stainless steel 5 mL grinding vessel equipped with three balls (stainless steel,  $\Phi=5$  mm) was loaded consecutively with the freshly prepared pyridinium salt (1 mmol, 1 equiv.), pyrylium tetrafluoroborate **2** (185 mg, 1.1 mmol, 1.1 equiv.), BaTiO<sub>3</sub> (933 mg, 4 mmol, 4 equiv.) and aryl boronic acid **4k** (1.3 mmol, 1.3 equiv.) and freshly sublimated DABCO (157 mg, 1.4 mmol, 1.4 equiv.). Lastly, freshly distilled 1,4-dioxane (0.25 mL) was added and the reaction vessel was properly sealed. The reaction vessel was installed on the ball mill outside the glovebox and the content was pulverized at 30Hz for 90 minutes. After completion of the reaction, the content of the vessel was directly subjected to flash column chromatography on silica gel to isolate the desired compound using gradient elution.

***General procedure for the solid-state synthesis of amide 8 following one-pot two-step procedure starting from amide 1x and dibenzylamine.***

Inside a glovebox, a stainless steel 5 mL grinding vessel equipped with three balls (stainless steel,  $\Phi=5$  mm) was loaded consecutively with the freshly prepared pyridinium salt (1 mmol, 1 equiv.), pyrylium tetrafluoroborate **2** (185 mg, 1.1 mmol, 1.1 equiv.), BaTiO<sub>3</sub> (933 mg, 4 mmol, 4 equiv.) and freshly sublimated DABCO (157 mg, 1.4 mmol, 1.4 equiv.). Lastly, freshly distilled 1,4-dioxane (0.25 mL) was added and the reaction vessel was properly sealed. The reaction vessel was installed on the ball mill outside the glovebox and the content was pulverized at 30Hz for 35 minutes. Afterwards, dibenzylamine (296 mg, 1.5 mmol, 1.5 equiv.) was loaded inside the glovebox and the reaction vessel was pulverized at 30Hz for another 45 minutes. After completion of the reaction, the content of the vessel was directly subjected to flash column chromatography on silica gel to isolate the desired compound using gradient elution.



## (B) Characterization of products.

### phenyl(*p*-tolyl)methanone **3a**

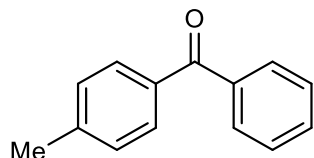

The title compound was prepared starting from an amide **1a** (121 mg, 1 mmol, 1 equiv.), pyrylium tetrafluoroborate **2** (185 mg, 1.1 mmol, 1.1 equiv.), BaTiO<sub>3</sub> (933 mg, 4 mmol, 4 equiv.), aryl boronic acid **4b** (177mg, 1.3 mmol, 1.3 equiv.), DABCO (157 mg, 1.4 mmol, 1.4 equiv.) and 1,4-dioxane (0.25 mL). The purification was accomplished by column chromatography on silica gel to provide the desired **3a** (176 mg, 0.90 mmol, 90%). The gram scale synthesis was performed on 10 mmol of starting amide **1a** and the product **3a** was prepared 85% in yield (1.66 g, 8.5 mmol).

Alternatively, the title compound was prepared starting from an amide **1b** (135 mg, 1 mmol, 1 equiv.), pyrylium tetrafluoroborate **2** (185 mg, 1.1 mmol, 1.1 equiv.), BaTiO<sub>3</sub> (933 mg, 4 mmol, 4 equiv.), aryl boronic acid **4a** (158 mg, 1.3 mmol, 1.3 equiv.), DABCO (157 mg, 1.4 mmol, 1.4 equiv.) and 1,4-dioxane (0.25 mL). The purification was accomplished by column chromatography on silica gel to provide the desired **3a** (180 mg, 0.92 mmol, 92%).

Alternatively, the title compound was prepared starting from an amide **1a** (121 mg, 1 mmol, 1 equiv.), pyrylium tetrafluoroborate **2** (185 mg, 1.1 mmol, 1.1 equiv.), BaTiO<sub>3</sub> (933 mg, 4 mmol, 4 equiv.), aryl trialkoxysilane **5b** (276 mg, 1.3 mmol, 1.3 equiv.), DABCO (157 mg, 1.4 mmol, 1.4 equiv.) and 1,4-dioxane (0.25 mL). The purification was accomplished by column chromatography on silica gel to provide the desired **3a** (125 mg, 0.64 mmol, 64%). The gram scale synthesis was performed on 10 mmol of starting amide **1a** and the product **3a** was prepared 53% in yield (1.04 g, 5.3 mmol).

Alternatively, the title compound was prepared starting from an amide **1b** (135 mg, 1 mmol, 1 equiv.), pyrylium tetrafluoroborate **2** (185 mg, 1.1 mmol, 1.1 equiv.), BaTiO<sub>3</sub> (933 mg, 4 mmol, 4 equiv.), aryl trialkoxysilane **5a** (257 mg, 1.3 mmol, 1.3 equiv.), DABCO (157 mg, 1.4 mmol, 1.4 equiv.) and 1,4-dioxane (0.25 mL). The purification was accomplished by column chromatography on silica gel to provide the desired **3a** (117 mg, 0.60 mmol, 60%).

Beige solid, mp 55-57 °C. <sup>1</sup>H NMR (400 MHz, CDCl<sub>3</sub>): δ 2.42 (s, 3H, Me), 7.26 (d, 2H, *J* = 7.2 Hz, CH<sub>Ar</sub>), 7.45 (t, 2H, *J* = 7.7 Hz, CH<sub>Ar</sub>), 7.55 (t, 1H, *J* = 7.8 Hz, CH<sub>Ar</sub>), 7.71 (d, 2H, *J* = 8.4 Hz, CH<sub>Ar</sub>), 7.77 (d, 2H, *J* = 7.7 Hz, CH<sub>Ar</sub>).

<sup>13</sup>C{<sup>1</sup>H} NMR (100 MHz, CDCl<sub>3</sub>): δ 21.6, 128.1, 128.9, 129.8, 130.2, 132.1, 134.8, 137.9, 143.1, 194.4.

Anal. calcd. for C<sub>14</sub>H<sub>12</sub>O: C, 85.68; H, 6.16. Found: C, 85.59; H, 6.13.

### phenyl(*o*-tolyl)methanone **3b**

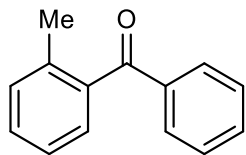

The title compound was prepared starting from an amide **1a** (121 mg, 1 mmol, 1 equiv.), pyrylium tetrafluoroborate **2** (185 mg, 1.1 mmol, 1.1 equiv.), BaTiO<sub>3</sub> (933 mg, 4 mmol, 4 equiv.), aryl boronic acid **4c** (177 mg, 1.3 mmol, 1.3 equiv.), DABCO (157 mg, 1.4 mmol, 1.4 equiv.) and 1,4-dioxane (0.25 mL). The purification was accomplished by column chromatography on silica gel to provide the desired **3b** (155 mg, 0.79 mmol, 79%).

Alternatively, the title compound was prepared starting from an amide **1c** (135 mg, 1 mmol, 1 equiv.), pyrylium tetrafluoroborate **2** (185 mg, 1.1 mmol, 1.1 equiv.), BaTiO<sub>3</sub> (933 mg, 4 mmol, 4 equiv.), aryl boronic acid **4a** (158 mg, 1.3 mmol, 1.3 equiv.), DABCO (157 mg, 1.4 mmol, 1.4 equiv.) and 1,4-dioxane (0.25 mL). The purification was accomplished by column chromatography on silica gel to provide the desired **3b** (178 mg, 0.91 mmol, 91%).

Alternatively, the title compound was prepared starting from an amide **1a** (121 mg, 1 mmol, 1 equiv.), pyrylium tetrafluoroborate **2** (185 mg, 1.1 mmol, 1.1 equiv.), BaTiO<sub>3</sub> (933 mg, 4 mmol, 4 equiv.), aryl trialkoxysilane **5c** (257 mg, 1.3 mmol, 1.3 equiv.), DABCO (157 mg, 1.4 mmol, 1.4 equiv.) and 1,4-dioxane (0.25 mL). The purification was accomplished by column chromatography on silica gel to provide the desired **3b** (100 mg, 0.51 mmol, 51%).

Alternatively, the title compound was prepared starting from an amide **1c** (135 mg, 1 mmol, 1 equiv.), pyrylium tetrafluoroborate **2** (185 mg, 1.1 mmol, 1.1 equiv.), BaTiO<sub>3</sub> (933 mg, 4 mmol, 4 equiv.), aryl trialkoxysilane **5a** (257 mg, 1.3 mmol, 1.3 equiv.), DABCO (157 mg, 1.4 mmol, 1.4 equiv.) and 1,4-dioxane (0.25 mL). The purification was accomplished by column chromatography on silica gel to provide the desired **3b** (114 mg, 0.58 mmol, 58%).

Colorless oil. <sup>1</sup>H NMR (400 MHz, CDCl<sub>3</sub>): δ 2.33 (s, 3H, Me), 7.23 – 7.32 (m, 3H, CH<sub>Ar</sub>), 7.38 (t, 1H, *J* = 7.5 Hz, CH<sub>Ar</sub>), 7.44 (t, 2H, *J* = 7.8 Hz, CH<sub>Ar</sub>), 7.57 (t, 1H, *J* = 7.8 Hz, CH<sub>Ar</sub>), 7.79 (d, 2H, *J* = 7.7 Hz, CH<sub>Ar</sub>).

<sup>13</sup>C{<sup>1</sup>H} NMR (100 MHz, CDCl<sub>3</sub>): δ 19.9, 125.1, 128.4, 130.1, 130.2, 130.9, 133.1, 136.7, 137.7, 138.6, 198.6.

MS (GC, 70eV): *m/z* (%) = 196 (M<sup>+</sup>, 62), 195 (100), 119 (25), 105 (20).

Anal. calcd. for C<sub>14</sub>H<sub>12</sub>O: C, 85.68; H, 6.16. Found: C, 85.81; H, 6.08.

### (2,5-difluorophenyl)(phenyl)methanone **3c**

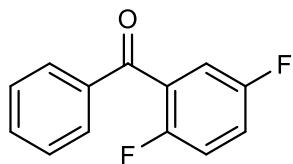

The title compound was prepared starting from an amide **1a** (121 mg, 1 mmol, 1 equiv.), pyrylium tetrafluoroborate **2** (185 mg, 1.1 mmol, 1.1 equiv.), BaTiO<sub>3</sub> (933 mg, 4 mmol, 4 equiv.), aryl boronic acid **4d** (1205 mg, 1.3 mmol, 1.3 equiv.), DABCO (157 mg, 1.4 mmol, 1.4 equiv.) and 1,4-dioxane (0.25 mL). The purification was accomplished by column chromatography on silica gel to provide the desired **3c** (183 mg, 0.84 mmol, 84%).

Alternatively, the title compound was prepared starting from an amide **1d** (157 mg, 1 mmol, 1 equiv.), pyrylium tetrafluoroborate **2** (185 mg, 1.1 mmol, 1.1 equiv.), BaTiO<sub>3</sub> (933 mg, 4 mmol, 4 equiv.), aryl boronic acid **4a** (158 mg, 1.3 mmol, 1.3 equiv.), DABCO (157 mg, 1.4 mmol, 1.4 equiv.) and 1,4-dioxane (0.25 mL). The purification was accomplished by column chromatography on silica gel to provide the desired **3c** (192 mg, 0.88 mmol, 88%).

Alternatively, the title compound was prepared starting from an amide **1a** (121 mg, 1 mmol, 1 equiv.), pyrylium tetrafluoroborate **2** (185 mg, 1.1 mmol, 1.1 equiv.), BaTiO<sub>3</sub> (933 mg, 4 mmol, 4 equiv.), aryl trialkoxysilane **5d** (304 mg, 1.3 mmol, 1.3 equiv.), DABCO (157 mg, 1.4 mmol, 1.4 equiv.) and 1,4-dioxane (0.25 mL). The purification was accomplished by column chromatography on silica gel to provide the desired **3c** (137 mg, 0.63 mmol, 63%).

Light yellow liquid. <sup>1</sup>H NMR (500 MHz, CDCl<sub>3</sub>): δ 6.87 – 6.91 (m, 1H, CH<sub>Ar</sub>), 6.97 – 7.01 (m, 1H, CH<sub>Ar</sub>), 7.45 – 7.48 (m, 2H, CH<sub>Ar</sub>), 7.58 – 7.61 (m, 2H, CH<sub>Ar</sub>), 7.79 – 7.81 (m, 2H, CH<sub>Ar</sub>).

<sup>13</sup>C{<sup>1</sup>H} NMR (125 MHz, CDCl<sub>3</sub>): δ 104.7 (t, *J*<sub>CF</sub> = 25.6 Hz), 111.9 (dd, *J*<sub>CF</sub> = 21.5 Hz, *J*<sub>CF</sub> = 3.5 Hz), 123.4 (dd, *J*<sub>CF</sub> = 14.5 Hz, *J*<sub>CF</sub> = 3.7 Hz), 128.5, 129.7, 132.6 (dd, *J*<sub>CF</sub> = 10.4 Hz, *J*<sub>CF</sub> = 4.3 Hz), 133.5, 137.4, 160.9 (dd, <sup>1</sup>*J*<sub>CF</sub> = 256 Hz, *J*<sub>CF</sub> = 12.2 Hz), 164.9 (dd, <sup>1</sup>*J*<sub>CF</sub> = 255 Hz, *J*<sub>CF</sub> = 11.7 Hz), 192.3.

MS (GC, 70eV): *m/z* (%) = 218 (M<sup>+</sup>, 65), 141 (68), 113 (34), 105 (100).

Anal. calcd. for C<sub>13</sub>H<sub>8</sub>F<sub>2</sub>O: C, 71.56; H, 3.70. Found: C, 71.63; H, 3.68.

### (3,5-difluorophenyl)(phenyl)methanone **3d**

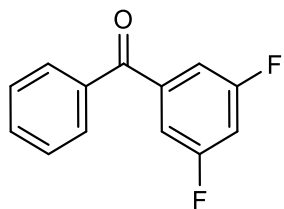

The title compound was prepared starting from an amide **1a** (121 mg, 1 mmol, 1 equiv.), pyrylium tetrafluoroborate **2** (185 mg, 1.1 mmol, 1.1 equiv.), BaTiO<sub>3</sub> (933 mg, 4 mmol, 4 equiv.), aryl boronic acid **4e** (205 mg, 1.3 mmol, 1.3 equiv.), DABCO (157 mg, 1.4 mmol, 1.4 equiv.) and 1,4-dioxane (0.25 mL). The purification was accomplished by column chromatography on silica gel to provide the desired **3d** (190 mg, 0.87 mmol, 87%).

Alternatively, the title compound was prepared starting from an amide **1e** (157 mg, 1 mmol, 1 equiv.), pyrylium tetrafluoroborate **2** (185 mg, 1.1 mmol, 1.1 equiv.), BaTiO<sub>3</sub> (933 mg, 4 mmol, 4 equiv.), aryl boronic acid **4a** (158 mg, 1.3 mmol, 1.3 equiv.), DABCO (157 mg, 1.4 mmol, 1.4 equiv.) and

1,4-dioxane (0.25 mL). The purification was accomplished by column chromatography on silica gel to provide the desired **3d** (203 mg, 0.93 mmol, 93%).

Alternatively, the title compound was prepared starting from an amide **1e** (157 mg, 1 mmol, 1 equiv.), pyrylium tetrafluoroborate **2** (185 mg, 1.1 mmol, 1.1 equiv.), BaTiO<sub>3</sub> (933 mg, 4 mmol, 4 equiv.), aryl trialkoxysilane **5a** (257 mg, 1.3 mmol, 1.3 equiv.), DABCO (157 mg, 1.4 mmol, 1.4 equiv.) and 1,4-dioxane (0.25 mL). The purification was accomplished by column chromatography on silica gel to provide the desired **3d** (142 mg, 0.65 mmol, 65%).

Yellow solid, mp 58-59 °C. <sup>1</sup>H NMR (500 MHz, DMSO-*d*<sub>6</sub>): δ 7.32 – 7.37 (m, 2H, CH<sub>Ar</sub>), 7.54 – 7.58 (m, 3H, CH<sub>Ar</sub>), 7.67 – 7.70 (m, 1H, CH<sub>Ar</sub>), 7.74 – 7.76 (m, 2H, CH<sub>Ar</sub>).

<sup>13</sup>C{<sup>1</sup>H} NMR (125 MHz, DMSO-*d*<sub>6</sub>): δ 117.8 (m), 122.6 (m), 136.7, 139.8, 143.4, 145.8, 150.4 (t, *J*<sub>CF</sub> = 8 Hz), 172.1 (dd, <sup>1</sup>*J*<sub>CF</sub> = 249 Hz, *J*<sub>CF</sub> = 12.2 Hz), 203.2.

Anal. calcd. for C<sub>13</sub>H<sub>8</sub>F<sub>2</sub>O: C, 71.56; H, 3.70. Found: C, 71.49; H, 3.79.

### bis(3-fluorophenyl)methanone **3e**

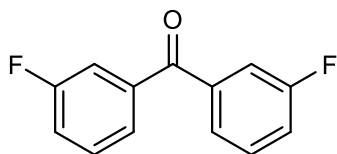

The title compound was prepared starting from an amide **1f** (139 mg, 1 mmol, 1 equiv.), pyrylium tetrafluoroborate **2** (185 mg, 1.1 mmol, 1.1 equiv.), BaTiO<sub>3</sub> (933 mg, 4 mmol, 4 equiv.), aryl boronic acid **4f** (182 mg, 1.3 mmol, 1.3 equiv.), DABCO (157 mg, 1.4 mmol, 1.4 equiv.) and 1,4-dioxane (0.25 mL). The purification was accomplished by column chromatography on silica gel to provide the desired **3e** (200 mg, 0.92 mmol, 92%). The gram scale synthesis was performed on 10 mmol of starting amide **1f** and the product **3e** was prepared 90% in yield (1.96 g, 9.0 mmol).

Alternatively, the title compound was prepared starting from an amide **1f** (139 mg, 1 mmol, 1 equiv.), pyrylium tetrafluoroborate **2** (185 mg, 1.1 mmol, 1.1 equiv.), BaTiO<sub>3</sub> (933 mg, 4 mmol, 4 equiv.), aryl trialkoxysilane **5e** (281 mg, 1.3 mmol, 1.3 equiv.), DABCO (157 mg, 1.4 mmol, 1.4 equiv.) and 1,4-dioxane (0.25 mL). The purification was accomplished by column chromatography on silica gel to provide the desired **3e** (124 mg, 0.57 mmol, 57%).

White solid, mp 60-61 °C. <sup>1</sup>H NMR (400 MHz, CDCl<sub>3</sub>): δ 7.28 – 7.33 (m, 2H, CH<sub>Ar</sub>), 7.45 – 7.47 (m, 1H, CH<sub>Ar</sub>), 7.48 – 7.52 (m, 3H, CH<sub>Ar</sub>), 7.55 – 7.58 (m, 2H, CH<sub>Ar</sub>).

<sup>19</sup>F NMR (376 MHz, CDCl<sub>3</sub>): δ -111.6 (td, *J* = 8.6 Hz, *J* = 5.6 Hz).

<sup>13</sup>C{<sup>1</sup>H} NMR (100 MHz, CDCl<sub>3</sub>): δ 116.7 (d, *J*<sub>CF</sub> = 22.6 Hz), 119.8 (d, *J*<sub>CF</sub> = 21.8 Hz), 125.8 (d, *J*<sub>CF</sub> = 3 Hz), 130.1 (d, *J*<sub>CF</sub> = 7.8 Hz), 139.1 (d, *J*<sub>CF</sub> = 6.5 Hz), 162.5 (d, <sup>1</sup>*J*<sub>CF</sub> = 248.5 Hz), 193.8 (t, <sup>4</sup>*J*<sub>CF</sub> = 2.2 Hz).

MS (GC, 70eV): *m/z* (%) = 218 (M<sup>+</sup>, 52), 123 (100).

Anal. calcd. for C<sub>13</sub>H<sub>8</sub>F<sub>2</sub>O: C, 71.56; H, 3.70. Found: C, 71.62; H, 3.83.

### phenyl(2-(trifluoromethyl)phenyl)methanone **3f**

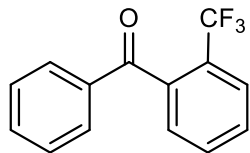

The title compound was prepared starting from an amide **1a** (121 mg, 1 mmol, 1 equiv.), pyrylium tetrafluoroborate **2** (185 mg, 1.1 mmol, 1.1 equiv.), BaTiO<sub>3</sub> (933 mg, 4 mmol, 4 equiv.), aryl boronic acid **4g** (247 mg, 1.3 mmol, 1.3 equiv.), DABCO (157 mg, 1.4 mmol, 1.4 equiv.) and 1,4-dioxane (0.25 mL). The purification was accomplished by column chromatography on silica gel to provide the desired **3f** (147 mg, 0.59 mmol, 59%).

White solid, mp 61-62 °C. <sup>1</sup>H NMR (400 MHz, CDCl<sub>3</sub>): δ 7.38 – 7.40 (m, 1H, CH<sub>Ar</sub>), 7.44 – 7.48 (m, 2H, CH<sub>Ar</sub>), 7.58 – 7.65 (m, 3H, CH<sub>Ar</sub>), 7.77 – 7.79 (m, 3H, CH<sub>Ar</sub>).

<sup>19</sup>F NMR (376 MHz, CDCl<sub>3</sub>): δ -58.04 (s, CF<sub>3</sub>).

<sup>13</sup>C{<sup>1</sup>H} NMR (100 MHz, CDCl<sub>3</sub>): δ 123.6 (q, <sup>1</sup>J<sub>CF</sub> = 273.9 Hz), 126.7 (q, J<sub>CF</sub> = 4.7 Hz), 128.1, 128.2 (q, J<sub>CF</sub> = 32.4 Hz), 128.5, 129.8, 130.2, 131.4, 133.9, 136.4, 138.3 (q, J<sub>CF</sub> = 2.1 Hz).

MS (GC, 70eV): m/z (%) = 250 (M<sup>+</sup>, 62), 173 (30), 105 (100).

Anal. calcd. for C<sub>14</sub>H<sub>9</sub>F<sub>3</sub>O: C, 67.20; H, 3.63. Found: C, 67.09; H, 3.72.

### (3,5-bis(trifluoromethyl)phenyl)(phenyl)methanone **3g**

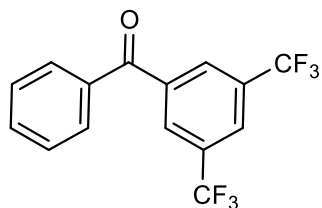

The title compound was prepared starting from an amide **1a** (121 mg, 1 mmol, 1 equiv.), pyrylium tetrafluoroborate **2** (185 mg, 1.1 mmol, 1.1 equiv.), BaTiO<sub>3</sub> (933 mg, 4 mmol, 4 equiv.), aryl boronic acid **4h** (335 mg, 1.3 mmol, 1.3 equiv.), DABCO (157 mg, 1.4 mmol, 1.4 equiv.) and 1,4-dioxane (0.25 mL). The purification was accomplished by column chromatography on silica gel to provide the desired **3g** (277 mg, 0.87 mmol, 87%). The gram scale synthesis was performed on 10 mmol of starting amide **1a** and the product **3g** was prepared 86% in yield (2.73 g, 8.6 mmol).

White viscous. <sup>1</sup>H NMR (500 MHz, CDCl<sub>3</sub>): δ 7.54 – 7.57 (m, 2H, CH<sub>Ar</sub>), 7.66 – 7.69 (m, 1H, CH<sub>Ar</sub>), 7.78 – 7.81 (m, 2H, CH<sub>Ar</sub>), 8.10 (s, 1H, CH<sub>Ar</sub>), 8.24 (s, 2H, CH<sub>Ar</sub>).

$^{13}\text{C}\{^1\text{H}\}$  NMR (125 MHz,  $\text{CDCl}_3$ ):  $\delta$  122.9 (q,  $^1J_{\text{CF}} = 273$  Hz), 125.6 (sep,  $^3J_{\text{CF}} = 3.6$  Hz), 128.8, 129.8 (m), 130, 132 (q,  $J_{\text{CF}} = 34$  Hz), 133.6, 135.9, 139.4, 193.5.

MS (GC, 70eV):  $m/z$  (%) = 318 ( $\text{M}^+$ , 24), 213 (14), 105 (100).

Anal. calcd. for  $\text{C}_{15}\text{H}_8\text{F}_6\text{O}$ : C, 56.62; H, 2.53. Found: C, 56.55; H, 2.63.

### (3-fluoro-4-(trifluoromethyl)phenyl)(phenyl)methanone **3h**

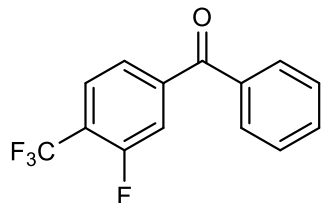

The title compound was prepared starting from an amide **1a** (121 mg, 1 mmol, 1 equiv.), pyrylium tetrafluoroborate **2** (185 mg, 1.1 mmol, 1.1 equiv.),  $\text{BaTiO}_3$  (933 mg, 4 mmol, 4 equiv.), aryl boronic acid **4i** (270 mg, 1.3 mmol, 1.3 equiv.), DABCO (157 mg, 1.4 mmol, 1.4 equiv.) and 1,4-dioxane (0.25 mL). The purification was accomplished by column chromatography on silica gel to provide the desired **3h** (241 mg, 0.90 mmol, 90%).

White solid, mp 65-66 °C.  $^1\text{H}$  NMR (400 MHz,  $\text{CDCl}_3$ ):  $\delta$  7.52 (t, 2H,  $J = 7.6$  Hz,  $\text{CH}_{\text{Ar}}$ ), 7.60 – 7.67 (m, 3H,  $\text{CH}_{\text{Ar}}$ ), 7.75 (t, 1H,  $J = 7.3$  Hz,  $\text{CH}_{\text{Ar}}$ ), 7.79 – 7.81 (m, 2H,  $\text{CH}_{\text{Ar}}$ ).

$^{13}\text{C}\{^1\text{H}\}$  NMR (100 MHz,  $\text{CDCl}_3$ ):  $\delta$  118.0 (d,  $J_{\text{CF}} = 21.1$  Hz), 121.5 (dq,  $J_{\text{CF}} = 33.1$  Hz  $J_{\text{CF}} = 14.0$  Hz), 122.2 (q,  $^1J_{\text{CF}} = 272.8$  Hz), 125.3 (d,  $J_{\text{CF}} = 4.3$  Hz), 127.4 (m), 128.7, 130.1, 133.4, 136.2, 143.1 (d,  $J_{\text{CF}} = 6.8$  Hz), 159.5 (dq,  $^1J_{\text{CF}} = 258.1$  Hz,  $J_{\text{CF}} = 2.0$  Hz), 194.0 (d,  $J_{\text{CF}} = 1.0$  Hz).

MS (GC, 70eV):  $m/z$  (%) = 268 ( $\text{M}^+$ , 41), 191 (16), 163 (22), 105 (100).

Anal. calcd. for  $\text{C}_{14}\text{H}_8\text{F}_4\text{O}$ : C, 62.69; H, 3.01. Found: C, 62.79; H, 2.96.

### bis(3-(trifluoromethyl)phenyl)methanone **3i**

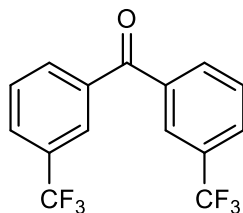

The title compound was prepared starting from an amide **1g** (189 mg, 1 mmol, 1 equiv.), pyrylium tetrafluoroborate **2** (185 mg, 1.1 mmol, 1.1 equiv.),  $\text{BaTiO}_3$  (933 mg, 4 mmol, 4 equiv.), aryl boronic acid **4j** (247 mg, 1.3 mmol, 1.3 equiv.), DABCO (157 mg, 1.4 mmol, 1.4 equiv.) and 1,4-dioxane (0.25 mL). The purification was accomplished by column chromatography on silica gel to provide the desired **3i** (277 mg, 0.87 mmol, 87%).

Alternatively, the title compound was prepared starting from an amide **1g** (189 mg, 1 mmol, 1 equiv.), pyrylium tetrafluoroborate **2** (185 mg, 1.1 mmol, 1.1 equiv.), BaTiO<sub>3</sub> (933 mg, 4 mmol, 4 equiv.), aryl trialkoxysilane **5f** (345 mg, 1.3 mmol, 1.3 equiv.), DABCO (157 mg, 1.4 mmol, 1.4 equiv.) and 1,4-dioxane (0.25 mL). The purification was accomplished by column chromatography on silica gel to provide the desired **3i** (197 mg, 0.62 mmol, 62%).

White solid, mp 100-101 °C. <sup>1</sup>H NMR (400 MHz, CDCl<sub>3</sub>): δ 7.82 (t, 2H, *J* = 7.6 Hz, CH<sub>Ar</sub>), 8.02 – 8.03 (m, 4H, CH<sub>Ar</sub>), 8.07 (d, 2H, *J* = 7.8 Hz, CH<sub>Ar</sub>).

<sup>13</sup>C{<sup>1</sup>H} NMR (100 MHz, CDCl<sub>3</sub>): δ 123.7 (q, <sup>1</sup>*J*<sub>CF</sub> = 273 Hz), 125.9 (q, *J*<sub>CF</sub> = 3.6 Hz), 129.4 (q, *J*<sub>CF</sub> = 2.7 Hz), 129.5 (q, *J*<sub>CF</sub> = 33.1 Hz), 130.0, 133.7, 137.2, 193.3.

MS (GC, 70eV): *m/z* (%) = 316 (M<sup>+</sup>, 31), 301 (100), 183 (25).

Anal. calcd. for C<sub>17</sub>H<sub>17</sub>BrO: C, 64.37; H, 5.40. Found: C, 64.42; H, 5.33.

### (2-chlorophenyl)(4-chlorophenyl)methanone **3j**

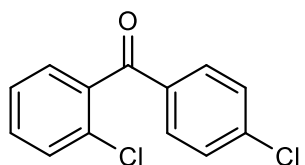

The title compound was prepared starting from an amide **1h** (156 mg, 1 mmol, 1 equiv.), pyrylium tetrafluoroborate **2** (185 mg, 1.1 mmol, 1.1 equiv.), BaTiO<sub>3</sub> (933 mg, 4 mmol, 4 equiv.), aryl boronic acid **4k** (203 mg, 1.3 mmol, 1.3 equiv.), DABCO (157 mg, 1.4 mmol, 1.4 equiv.) and 1,4-dioxane (0.25 mL). The purification was accomplished by column chromatography on silica gel to provide the desired **3j** (236 mg, 0.94 mmol, 94%).

Alternatively, the title compound was prepared starting from an amide **1i** (156 mg, 1 mmol, 1 equiv.), pyrylium tetrafluoroborate **2** (185 mg, 1.1 mmol, 1.1 equiv.), BaTiO<sub>3</sub> (933 mg, 4 mmol, 4 equiv.), aryl boronic acid **4l** (203 mg, 1.3 mmol, 1.3 equiv.), DABCO (157 mg, 1.4 mmol, 1.4 equiv.) and 1,4-dioxane (0.25 mL). The purification was accomplished by column chromatography on silica gel to provide the desired **3j** (208 mg, 0.83 mmol, 83%).

Alternatively, the title compound was prepared starting from an amide **1h** (156 mg, 1 mmol, 1 equiv.), pyrylium tetrafluoroborate **2** (185 mg, 1.1 mmol, 1.1 equiv.), BaTiO<sub>3</sub> (933 mg, 4 mmol, 4 equiv.), aryl trialkoxysilane **5g** (279 mg, 1.3 mmol, 1.3 equiv.), DABCO (157 mg, 1.4 mmol, 1.4 equiv.) and 1,4-dioxane (0.25 mL). The purification was accomplished by column chromatography on silica gel to provide the desired **3j** (206 mg, 0.82 mmol, 82%).

White solid, mp 64-65 °C. <sup>1</sup>H NMR (400 MHz, CDCl<sub>3</sub>): δ 7.37 – 7.38 (m, 2H, CH<sub>Ar</sub>), 7.44 (dt, 2H, *J* = 8.7 Hz, *J* = 2.0 Hz, CH<sub>Ar</sub>), 7.45 – 7.46 (m, 2H, CH<sub>Ar</sub>), 7.74 (dt, 2H, *J* = 8.7 Hz, *J* = 2.0 Hz, CH<sub>Ar</sub>).

<sup>13</sup>C{<sup>1</sup>H} NMR (100 MHz, CDCl<sub>3</sub>): δ 126.8, 129.0, 129.1, 130.1, 131.3, 131.4, 134.9, 138.1, 140.3, 194.0.

MS (GC, 70eV): *m/z* (%) = 252 (18), 250 (M<sup>+</sup>, 28), 139 (100), 111 (27).

Anal. calcd. for C<sub>13</sub>H<sub>8</sub>Cl<sub>2</sub>O: C, 62.18; H, 3.21. Found: C, 62.29; H, 3.27.

### (3-chlorophenyl)(4-chlorophenyl)methanone **3k**

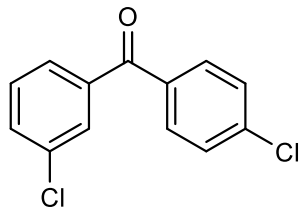

The title compound was prepared starting from an amide **1j** (156 mg, 1 mmol, 1 equiv.), pyrylium tetrafluoroborate **2** (185 mg, 1.1 mmol, 1.1 equiv.), BaTiO<sub>3</sub> (933 mg, 4 mmol, 4 equiv.), aryl boronic acid **4k** (203 mg, 1.3 mmol, 1.3 equiv.), DABCO (157 mg, 1.4 mmol, 1.4 equiv.) and 1,4-dioxane (0.25 mL). The purification was accomplished by column chromatography on silica gel to provide the desired **3k** (213 mg, 0.85 mmol, 85%).

Alternatively, the title compound was prepared starting from an amide **1j** (156 mg, 1 mmol, 1 equiv.), pyrylium tetrafluoroborate **2** (185 mg, 1.1 mmol, 1.1 equiv.), BaTiO<sub>3</sub> (933 mg, 4 mmol, 4 equiv.), aryl trialkoxysilane **5g** (279 mg, 1.3 mmol, 1.3 equiv.), DABCO (157 mg, 1.4 mmol, 1.4 equiv.) and 1,4-dioxane (0.25 mL). The purification was accomplished by column chromatography on silica gel to provide the desired **3k** (123 mg, 0.49 mmol, 49%).

Alternatively, the title compound was prepared starting from freshly prepared pyridinium salt (254 mg, 1 mmol, 1 equiv.), pyrylium tetrafluoroborate **2** (185 mg, 1.1 mmol, 1.1 equiv.), BaTiO<sub>3</sub> (933 mg, 4 mmol, 4 equiv.) and aryl boronic acid **4k** (203 mg, 1.3 mmol, 1.3 equiv.), DABCO (157 mg, 1.4 mmol, 1.4 equiv.) and freshly distilled 1,4-dioxane (0.25 mL). The purification was accomplished by column chromatography on silica gel to provide the desired **3k** (176 mg, 0.70 mmol, 70%).

Yellowish, mp 112-113 °C. <sup>1</sup>H NMR (400 MHz, CDCl<sub>3</sub>): δ 7.42 (t, 1H, *J* = 7.8 Hz, CH<sub>Ar</sub>), 7.45 – 7.48 (m, 2H, CH<sub>Ar</sub>), 7.56 (ddd, 1H, *J* = 8 Hz, *J* = 2.2 Hz, *J* = 1.2 Hz, CH<sub>Ar</sub>), 7.61 – 7.64 (m, 1H, CH<sub>Ar</sub>), 7.71 – 7.75 (m, 3H, CH<sub>Ar</sub>).

<sup>13</sup>C{<sup>1</sup>H} NMR (100 MHz, CDCl<sub>3</sub>): δ 128, 128.6, 129.8, 131.4, 132.6, 134.7, 135.2, 138.9, 139.4, 193.9.

MS (GC, 70eV): *m/z* (%) = 252 (18), 250 (M<sup>+</sup>, 28), 139 (100), 111 (35).

Anal. calcd. for C<sub>13</sub>H<sub>8</sub>Cl<sub>2</sub>O: C, 62.18; H, 3.21. Found: C, 62.29; H, 3.27.

### bis(4-bromophenyl)methanone **3l**

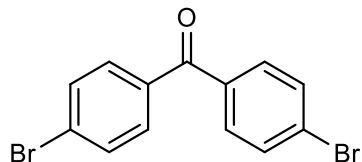



The title compound was prepared starting from an amide **1k** (200 mg, 1 mmol, 1 equiv.), pyrylium tetrafluoroborate **2** (185 mg, 1.1 mmol, 1.1 equiv.), BaTiO<sub>3</sub> (933 mg, 4 mmol, 4 equiv.), aryl boronic acid **4m** (260 mg, 1.3 mmol, 1.3 equiv.), DABCO (157 mg, 1.4 mmol, 1.4 equiv.) and 1,4-dioxane (0.25 mL). The purification was accomplished by column chromatography on silica gel to provide the desired **3l** (275 mg, 0.81 mmol, 81%).

Light brown solid, mp 173-174 °C. <sup>1</sup>H NMR (400 MHz, CDCl<sub>3</sub>): δ 7.62 (d, 4H, *J* = 8.8 Hz, CH<sub>Ar</sub>), 7.65 (d, 4H, *J* = 8.8 Hz, CH<sub>Ar</sub>).

<sup>13</sup>C{<sup>1</sup>H} NMR (100 MHz, CDCl<sub>3</sub>): δ 127.8, 131.4, 131.8, 135.9, 194.5.

Anal. calcd. for C<sub>13</sub>H<sub>8</sub>Br<sub>2</sub>O: C, 45.92; H, 2.37. Found: C, 45.83; H, 2.42.

### bis(4-(diethylamino)phenyl)methanone **3m**

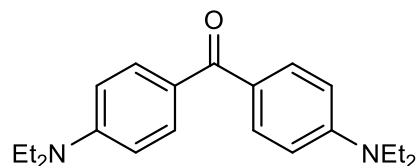

The title compound was prepared starting from an amide **1l** (164 mg, 1 mmol, 1 equiv.), pyrylium tetrafluoroborate **2** (185 mg, 1.1 mmol, 1.1 equiv.), BaTiO<sub>3</sub> (933 mg, 4 mmol, 4 equiv.), aryl boronic acid **4n** (215 mg, 1.3 mmol, 1.3 equiv.), DABCO (157 mg, 1.4 mmol, 1.4 equiv.) and 1,4-dioxane (0.25 mL). The purification was accomplished by column chromatography on silica gel to provide the desired **3m** (240 mg, 0.74 mmol, 74%).

Yellow solid, mp 90-91 °C. <sup>1</sup>H NMR (400 MHz, CDCl<sub>3</sub>): δ 1.22 (s, 12H, 4xCH<sub>3</sub>), 3.43 (m, 8H, 4xCH<sub>2</sub>), 7.65 (d, 4H, <sup>3</sup>*J* = 8.1 Hz, CH), 7.75 (d, 4H, *J* = 8.1 Hz, CH<sub>Ar</sub>).

<sup>13</sup>C{<sup>1</sup>H} NMR (100 MHz, CDCl<sub>3</sub>): δ 12.8, 44.5, 110.0, 125.6, 132.5, 150.3, 193.8.

MS (GC, 70eV): *m/z* (%) = 342 (38), 309 (100), 265 (15).

Anal. calcd. for C<sub>21</sub>H<sub>28</sub>N<sub>2</sub>O: C, 77.74; H, 8.70; N, 8.63. Found: C, 77.69; H, 8.73; N, 8.55.

### (4-hydroxyphenyl)(phenyl)methanone **3n**

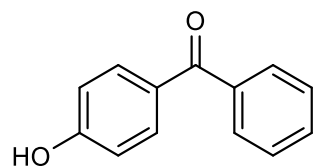

The title compound was prepared starting from an amide **1a** (121 mg, 1 mmol, 1 equiv.), pyrylium tetrafluoroborate **2** (185 mg, 1.1 mmol, 1.1 equiv.), BaTiO<sub>3</sub> (933 mg, 4 mmol, 4 equiv.), aryl boronic acid **4o** (179 mg, 1.3 mmol, 1.3 equiv.), DABCO (157 mg, 1.4 mmol, 1.4 equiv.) and 1,4-dioxane (0.25 mL). The purification was accomplished by column chromatography on silica gel to provide the desired **3n** (158 mg, 0.80 mmol, 80%).

White solid, mp 132-133 °C. <sup>1</sup>H NMR (400 MHz, CDCl<sub>3</sub>): δ 6.95 (d, 2H, *J* = 8.2 Hz, CH<sub>Ar</sub>), 7.47 (t, 2H, *J* = 7.4 Hz, CH<sub>Ar</sub>), 7.55 – 7.58 (m, 1H, CH<sub>Ar</sub>), 7.75 – 7.79 (m, 5H, OH, CH<sub>Ar</sub>).

$^{13}\text{C}\{^1\text{H}\}$  NMR (100 MHz,  $\text{CDCl}_3$ ):  $\delta$  115.4, 128.3, 129.4, 129.9, 132.3, 133.2, 138.0, 161.0, 197.1.

Anal. calcd. for  $\text{C}_{13}\text{H}_{10}\text{O}_2$ : C, 78.77; H, 5.09. Found: C, 78.82; H, 5.16.

### bis(4-bromophenyl)methanone **3o**

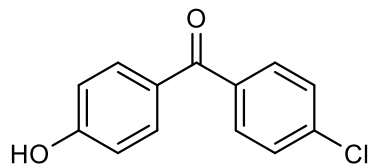

The title compound was prepared starting from an amide **1m** (137 mg, 1 mmol, 1 equiv.), pyrylium tetrafluoroborate **2** (185 mg, 1.1 mmol, 1.1 equiv.),  $\text{BaTiO}_3$  (933 mg, 4 mmol, 4 equiv.), aryl boronic acid **4k** (203 mg, 1.3 mmol, 1.3 equiv.), DABCO (157 mg, 1.4 mmol, 1.4 equiv.) and 1,4-dioxane (0.25 mL). The purification was accomplished by column chromatography on silica gel to provide the desired **3o** (183 mg, 0.79 mmol, 79%).

Beige solid, mp 177-178 °C.  $^1\text{H}$  NMR (400 MHz,  $\text{DMSO-d}_6$ ):  $\delta$  6.90 (d, 2H,  $J = 9.2$  Hz,  $\text{CH}_{\text{Ar}}$ ), 7.56 (d, 2H,  $J = 8.5$  Hz,  $\text{CH}_{\text{Ar}}$ ), 7.66 (t, 4H,  $J = 7.3$  Hz,  $\text{CH}_{\text{Ar}}$ ).

$^{13}\text{C}\{^1\text{H}\}$  NMR (100 MHz,  $\text{DMSO-d}_6$ ):  $\delta$  115.4, 127.6, 128.5, 131.1, 132.6, 136.8, 162.2, 193.2.

MS (GC, 70eV):  $m/z$  (%) = 232 ( $\text{M}^+$ , 54), 139 (21), 21 (100), 111 (14).

Anal. calcd. for  $\text{C}_{13}\text{H}_9\text{ClO}_2$ : C, 67.11; H, 3.90. Found: C, 67.13; H, 3.99.

### bis(4-hydroxyphenyl)methanone **3p**

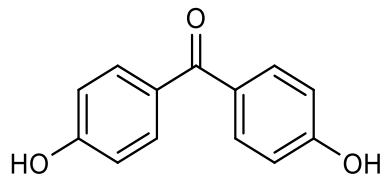

The title compound was prepared starting from an amide **1m** (137 mg, 1 mmol, 1 equiv.), pyrylium tetrafluoroborate **2** (185 mg, 1.1 mmol, 1.1 equiv.),  $\text{BaTiO}_3$  (933 mg, 4 mmol, 4 equiv.), aryl boronic acid **4o** (165 mg, 1.3 mmol, 1.3 equiv.), DABCO (157 mg, 1.4 mmol, 1.4 equiv.) and 1,4-dioxane (0.25 mL). The purification was accomplished by column chromatography on silica gel to provide the desired **3p** (162 mg, 0.76 mmol, 76%).

Beige solid, mp 212-213 °C.  $^1\text{H}$  NMR (400 MHz,  $\text{CDCl}_3$ ):  $\delta$  6.88 (d, 4H,  $J = 8.5$  Hz,  $\text{CH}_{\text{Ar}}$ ), 7.61 (d, 4H,  $J = 8.0$  Hz,  $\text{CH}_{\text{Ar}}$ ), 10.29 (s, 2H, OH).

$^{13}\text{C}\{^1\text{H}\}$  NMR (100 MHz,  $\text{CDCl}_3$ ):  $\delta$  115.2, 129.0, 132.2, 161.4, 193.3.

Anal. calcd. for  $\text{C}_{13}\text{H}_{10}\text{O}_3$ : C, 72.89; H, 4.71. Found: C, 72.80; H, 4.69.

### phenyl(2,3,4-trihydroxyphenyl)methanone **3q**

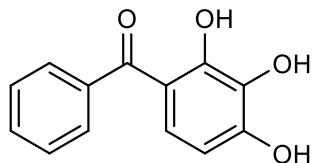

The title compound was prepared starting from an amide **1a** (121 mg, 1 mmol, 1 equiv.), pyrylium tetrafluoroborate **2** (185 mg, 1.1 mmol, 1.1 equiv.), BaTiO<sub>3</sub> (933 mg, 4 mmol, 4 equiv.), aryl boronic acid **4p** (221 mg, 1.3 mmol, 1.3 equiv.), DABCO (157 mg, 1.4 mmol, 1.4 equiv.) and 1,4-dioxane (0.25 mL). The purification was accomplished by column chromatography on silica gel to provide the desired **3q** (165 mg, 0.72 mmol, 72%).

Yelloish solid, mp 139-140 °C. <sup>1</sup>H NMR (400 MHz, CDCl<sub>3</sub>): δ 5.94 (br. s, 2H, 2xOH), 6.50 (d, 1H, *J* = 9.1 Hz, CH<sub>Ar</sub>), 7.15 (d, 1H, *J* = 9.1 Hz, CH<sub>Ar</sub>), 7.47 – 7.51 (m, 2H, CH<sub>Ar</sub>), 7.55 – 7.59 (m, 1H, CH<sub>Ar</sub>), 7.67 (d, 2H, *J* = 7.4 Hz, CH<sub>Ar</sub>), 10.68 (s, 1H, OH).

<sup>13</sup>C{<sup>1</sup>H} NMR (100 MHz, CDCl<sub>3</sub>): δ 107.1, 113.2, 126.6, 128.3, 129.0, 131.2, 131.7, 137.9, 150.0, 151.5, 200.6.

Anal. calcd. for C<sub>13</sub>H<sub>10</sub>O<sub>4</sub>: C, 67.82; H, 4.38. Found: C, 67.90; H, 4.31.

### phenyl(pyridin-4-yl)methanone **3r**

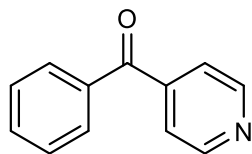

The title compound was prepared starting from an amide **1a** (121 mg, 1 mmol, 1 equiv.), pyrylium tetrafluoroborate **2** (185 mg, 1.1 mmol, 1.1 equiv.), BaTiO<sub>3</sub> (933 mg, 4 mmol, 4 equiv.), aryl boronic acid **4q** (160 mg, 1.3 mmol, 1.3 equiv.), DABCO (157 mg, 1.4 mmol, 1.4 equiv.) and 1,4-dioxane (0.25 mL). Yellowish solid, mp 69-71 °C. <sup>1</sup>H NMR (400 MHz, CDCl<sub>3</sub>): δ 7.51 (t, 2H, *J* = 7.6 Hz, CH<sub>Ar</sub>), 7.56 (d, 2H, *J* = 5.8 Hz, CH<sub>Ar</sub>), 7.64 (t, 1H, *J* = 7.5 Hz, CH<sub>Ar</sub>), 7.81 (d, 2H, *J* = 7.1 Hz, CH<sub>Ar</sub>), 8.80 (d, 2H, *J* = 5.8 Hz, CH<sub>Ar</sub>).

<sup>13</sup>C{<sup>1</sup>H} NMR (100 MHz, CDCl<sub>3</sub>): δ 122.8, 128.6, 130.1, 133.5, 135.9, 144.6, 150.6, 195.1.

Anal. calcd. for C<sub>12</sub>H<sub>9</sub>ON: C, 78.67; H, 4.95; N, 7.65. Found: C, 78.77; H, 5.02; N, 7.58.

### (4-bromophenyl)(4-(tert-butyl)phenyl)methanone **3s**

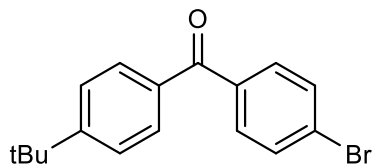

The title compound was prepared starting from an amide **1n** (177 mg, 1 mmol, 1 equiv.), pyrylium tetrafluoroborate **2** (185 mg, 1.1 mmol, 1.1 equiv.), BaTiO<sub>3</sub> (933 mg, 4 mmol, 4 equiv.), aryl boronic acid **4m** (260 mg, 1.3 mmol, 1.3 equiv.), DABCO (157 mg, 1.4 mmol, 1.4 equiv.) and 1,4-dioxane (0.25 mL). The purification was accomplished by column chromatography on silica gel to provide the desired **3s** (272 mg, 0.86 mmol, 86%).

Yellowish solid, mp 126-127 °C. <sup>1</sup>H NMR (400 MHz, CDCl<sub>3</sub>): δ 1.37 (s, 9H, C(CH<sub>3</sub>)<sub>3</sub>), 7.51 (d, 2H, *J* = 7.8 Hz, CH<sub>Ar</sub>), 7.62 (d, 2H, *J* = 7.8 Hz, CH<sub>Ar</sub>), 7.69 (d, 2H, *J* = 8.2 Hz, CH<sub>Ar</sub>), 7.74 (d, 2H, *J* = 8.2 Hz, CH<sub>Ar</sub>).

<sup>13</sup>C{<sup>1</sup>H} NMR (100 MHz, CDCl<sub>3</sub>): δ 31.1, 35.2, 125.4, 127.2, 130, 131.5, 134.4, 136.7, 156.5, 195.3.

MS (GC, 70eV): *m/z* (%) = 318 (30), 316 (M<sup>+</sup>, 31), 300 (100), 183 (26).

Anal. calcd. for C<sub>17</sub>H<sub>17</sub>BrO: C, 64.37; H, 5.40. Found: C, 64.425; H, 5.29.

### (E)-3-(2-nitrophenyl)-1-phenylprop-2-en-1-one **3t**

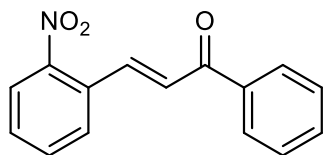

The title compound was prepared starting from an amide **1o** (192 mg, 1 mmol, 1 equiv.), pyrylium tetrafluoroborate **2** (185 mg, 1.1 mmol, 1.1 equiv.), BaTiO<sub>3</sub> (933 mg, 4 mmol, 4 equiv.), aryl boronic acid **4a** (158 mg, 1.3 mmol, 1.3 equiv.), DABCO (157 mg, 1.4 mmol, 1.4 equiv.) and 1,4-dioxane (0.25 mL). The purification was accomplished by column chromatography on silica gel to provide the desired **3t** (195 mg, 0.77 mmol, 77%).

Alternatively, the title compound was prepared starting from an amide **1o** (192 mg, 1 mmol, 1 equiv.), pyrylium tetrafluoroborate **2** (185 mg, 1.1 mmol, 1.1 equiv.), BaTiO<sub>3</sub> (933 mg, 4 mmol, 4 equiv.), aryl trialkoxysilane **5a** (257 mg, 1.3 mmol, 1.3 equiv.), DABCO (157 mg, 1.4 mmol, 1.4 equiv.) and 1,4-dioxane (0.25 mL). The purification was accomplished by column chromatography on silica gel to provide the desired **3t** (157 mg, 0.62 mmol, 62%).

Light yellow solid, mp 126-127 °C. <sup>1</sup>H NMR (500 MHz, CDCl<sub>3</sub>): δ 7.33 (d, 1H, <sup>3</sup>*J* = 15.6 Hz, CH), 7.49 – 7.52 (m, 2H, CH<sub>Ar</sub>), 7.54 – 7.61 (m, 2H, CH<sub>Ar</sub>), 7.67 – 7.70 (m, 1H, CH<sub>Ar</sub>), 7.73 – 7.76 (m, 1H, CH<sub>Ar</sub>), 8.00 – 8.02 (m, 2H, CH<sub>Ar</sub>), 8.05 (d, 1H, *J* = 8.3 Hz, CH<sub>Ar</sub>), 8.13 (d, 1H, <sup>3</sup>*J* = 15.6 Hz, CH).

<sup>13</sup>C{<sup>1</sup>H} NMR (125 MHz, CDCl<sub>3</sub>): δ 125, 127.3, 128.7, 128.8, 129.3, 130.4, 131.3, 133.2, 133.7, 137.4, 140.2, 148.6, 190.5.

Anal. calcd. for C<sub>15</sub>H<sub>11</sub>NO<sub>3</sub>: C, 71.14; H, 4.38; N, 5.53. Found: C, 71.22; H, 4.31; N, 5.49.

### 1,3-phenylenebis((4-fluorophenyl)methanone) **3u**

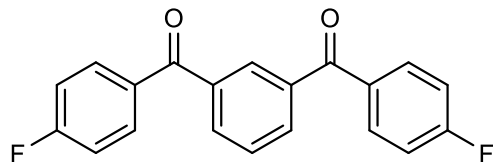

The title compound was prepared starting from an amide **1q** (164 mg, 1 mmol, 1 equiv.), pyrylium tetrafluoroborate **2** (370 mg, 2.2 mmol, 2.2 equiv.), BaTiO<sub>3</sub> (1.86 g, 8 mmol, 8 equiv.), aryl boronic acid **4r** (360 mg, 2.6 mmol, 2.6 equiv.), DABCO (314 mg, 2.8 mmol, 2.84 equiv.) and 1,4-dioxane (0.4 mL). The purification was accomplished by column chromatography on silica gel to provide the desired **3u** (267 mg, 0.83 mmol, 83%).

Alternatively, the title compound was prepared starting from an amide **1q** (164 mg, 1 mmol, 1 equiv.), pyrylium tetrafluoroborate **2** (370 mg, 2.2 mmol, 2.2 equiv.), BaTiO<sub>3</sub> (1.86 g, 8 mmol, 8 equiv.), aryl trialkoxysilane **5h** (518 mg, 2.6 mmol, 2.6 equiv.), DABCO (314 mg, 2.8 mmol, 2.84 equiv.) and 1,4-dioxane (0.4 mL). The purification was accomplished by column chromatography on silica gel to provide the desired **3u** (180 mg, 0.56 mmol, 56%).

Yellow solid, mp 181-182 °C. <sup>1</sup>H NMR (400 MHz, CDCl<sub>3</sub>): δ 7.17 (t, 4H, *J* = 8.8 Hz, CH<sub>Ar</sub>), 7.64 (t, 1H, *J* = 7.7 Hz, CH<sub>Ar</sub>), 7.84 – 7.88 (m, 4H, CH<sub>Ar</sub>), 7.99 (dd, 2H, *J* = 7.7 Hz, *J* = 1.5 Hz, CH<sub>Ar</sub>), 8.12 (s, 1H, CH<sub>Ar</sub>).

<sup>13</sup>C{<sup>1</sup>H} NMR (100 MHz, CDCl<sub>3</sub>): δ 115.6, 115.8, 128.6, 130.8, 132.6, 132.7, 133.1, 133.2, 133.3, 164.4, 166.69, 194.2.

MS (GC, 70eV): *m/z* (%) = 322 (M<sup>+</sup>, 40), 227 (23), 123 (100).

Anal. calcd. for C<sub>20</sub>H<sub>12</sub>F<sub>2</sub>O<sub>2</sub>: C, 74.53; H, 3.75. Found: C, 74.61; H, 3.88.

### cyclopropyl(4-methoxyphenyl)methanone **3v**

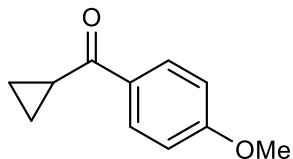

The title compound was prepared starting from an amide **1r** (85 mg, 1 mmol, 1 equiv.), pyrylium tetrafluoroborate **2** (185 mg, 1.1 mmol, 1.1 equiv.), BaTiO<sub>3</sub> (933 mg, 4 mmol, 4 equiv.), aryl boronic acid **4s** (197 mg, 1.3 mmol, 1.3 equiv.), DABCO (157 mg, 1.4 mmol, 1.4 equiv.) and 1,4-dioxane (0.25 mL). The purification was accomplished by column chromatography on silica gel to provide the desired **3v** (148 mg, 0.84 mmol, 84%).

Alternatively, the title compound was prepared starting from an amide **1r** (85 mg, 1 mmol, 1 equiv.), pyrylium tetrafluoroborate **2** (185 mg, 1.1 mmol, 1.1 equiv.), BaTiO<sub>3</sub> (933 mg, 4 mmol, 4 equiv.), aryl trialkoxysilane **5i** (296 mg, 1.3 mmol, 1.3 equiv.), DABCO (157 mg, 1.4 mmol, 1.4 equiv.) and 1,4-dioxane (0.25 mL). The purification was accomplished by column chromatography on silica gel to provide the desired **3v** (91 mg, 0.52 mmol, 52%).

White solid, mp 40-41 °C. <sup>1</sup>H NMR (400 MHz, CDCl<sub>3</sub>): δ 0.97 – 1.00 (m, 2H, CH<sub>2</sub>-Cyclopropyl), 1.19 – 1.21 (m, 2H, CH<sub>2</sub>-Cyclopropyl), 2.61 – 2.63 (m, 1H, CH-Cyclopropyl), 3.86 (s, 3H, Ome), 6.94 (d, 2H, *J* = 8.0 Hz, CH<sub>Ar</sub>), 8.00 (d, 2H, *J* = 9.1 Hz, CH<sub>Ar</sub>).

<sup>13</sup>C{<sup>1</sup>H} NMR (100 MHz, CDCl<sub>3</sub>): δ 11.2, 16.6, 55.4, 113.6, 130.2, 131.0, 163.2, 199.0.

MS (GC, 70eV): *m/z* (%) = 176 (M<sup>+</sup>, 35), 135 (100).

Anal. calcd. for C<sub>14</sub>H<sub>12</sub>O<sub>2</sub>: C, 74.98; H, 6.86. Found: C, 75.06; H, 6.73.

### 1-(4-methoxy-3-(trifluoromethyl)phenyl)ethan-1-one **3w**

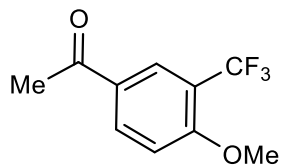

The title compound was prepared starting from an amide **1s** (59 mg, 1 mmol, 1 equiv.), pyrylium tetrafluoroborate **2** (185 mg, 1.1 mmol, 1.1 equiv.), BaTiO<sub>3</sub> (933 mg, 4 mmol, 4 equiv.), aryl boronic acid **4t** (286 mg, 1.3 mmol, 1.3 equiv.), DABCO (157 mg, 1.4 mmol, 1.4 equiv.) and 1,4-dioxane (0.25 mL). The purification was accomplished by column chromatography on silica gel to provide the desired **3w** (192 mg, 0.88 mmol, 88%).

Colourless liquid <sup>1</sup>H NMR (400 MHz, CDCl<sub>3</sub>): δ 2.58 (s, 3H, C(O)CH<sub>3</sub>), 3.98 (s, 3H, OCH<sub>3</sub>), 7.06 (d, 1H, *J* = 8.7 Hz, CH<sub>Ar</sub>), 8.13 (dd, 1H, *J* = 8.7 Hz, *J* = 2.1 Hz, CH<sub>Ar</sub>), 8.19 (d, 1H, *J* = 2.1 Hz, CH<sub>Ar</sub>).

<sup>19</sup>F NMR (376 MHz, CDCl<sub>3</sub>): δ -62.9 (s, CF<sub>3</sub>).

<sup>13</sup>C{<sup>1</sup>H} NMR (100 MHz, CDCl<sub>3</sub>): δ 26.3, 56.3, 111.6, 118.8 (q, *J*<sub>CF</sub> = 32 Hz), 123.1 (q, <sup>1</sup>*J*<sub>CF</sub> = 273 Hz), 127.9 (q, *J*<sub>CF</sub> = 5.2 Hz), 129.5, 133.9, 161 (q, *J*<sub>CF</sub> = 1.5 Hz), 195.6.

MS (GC, 70eV): *m/z* (%) = 218 (M<sup>+</sup>, 24), 203 (100), 127 (19).

Anal. calcd. for C<sub>10</sub>H<sub>9</sub>F<sub>3</sub>O<sub>2</sub>: C, 55.05; H, 4.16. Found: C, 55.19; H, 4.03.

### 1-(4-hydroxyphenyl)butan-1-one **3x**

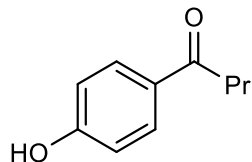

The title compound was prepared starting from an amide **1t** (87 mg, 1 mmol, 1 equiv.), pyrylium tetrafluoroborate **2** (185 mg, 1.1 mmol, 1.1 equiv.), BaTiO<sub>3</sub> (933 mg, 4 mmol, 4 equiv.), aryl boronic acid **4o** (179 mg, 1.3 mmol, 1.3 equiv.), DABCO (157 mg, 1.4 mmol, 1.4 equiv.) and 1,4-dioxane (0.25 mL). The purification was accomplished by column chromatography on silica gel to provide the desired **3x** (149 mg, 0.91 mmol, 91%). The gram scale synthesis was performed on 10 mmol of starting amide **1t** and the product **3x** was prepared 88% in yield (1.44 g, 8.8 mmol).

Alternatively, the title compound was prepared starting from an amide **1t** (87 mg, 1 mmol, 1 equiv.), pyrylium tetrafluoroborate **2** (185 mg, 1.1 mmol, 1.1 equiv.), BaTiO<sub>3</sub> (933 mg, 4 mmol, 4 equiv.), aryl trialkoxysilane **5j** (278 mg, 1.3 mmol, 1.3 equiv.), DABCO (157 mg, 1.4 mmol, 1.4 equiv.) and 1,4-dioxane (0.25 mL). The purification was accomplished by column chromatography on silica gel to provide the desired **3x** (98 mg, 0.60 mmol, 60%).

Pale yellow solid, mp 90-91 °C. <sup>1</sup>H NMR (400 MHz, CDCl<sub>3</sub>): δ 0.99 (t, 3H, *J* = 7.2 Hz, Me), 1.76 (m, 2H, CH<sub>2</sub>), 2.93 (t, 2H, *J* = 7.2 Hz, CH<sub>2</sub>), 6.99 (d, 2H, *J* = 8.9 Hz, CH<sub>Ar</sub>), 7.92 (d, 2H, *J* = 8.9 Hz, CH<sub>Ar</sub>), 8.71 (s, 1H, OH).

$^{13}\text{C}\{\text{1H}\}$  NMR (100 MHz,  $\text{CDCl}_3$ ):  $\delta$  13.8, 18.3, 40.2, 115.6, 129.0, 131.0, 161.6, 201.7.

MS (GC, 70eV):  $m/z$  (%) = 164 ( $\text{M}^+$ , 14), 121 (100).

Anal. calcd. for  $\text{C}_{10}\text{H}_{12}\text{O}_2$ : C, 73.15; H, 7.37. Found: C, 73.19; H, 7.42.

### 3-(3,5-bis(trifluoromethyl)benzoyl)-6-methyl-4H-chromen-4-one **3y**

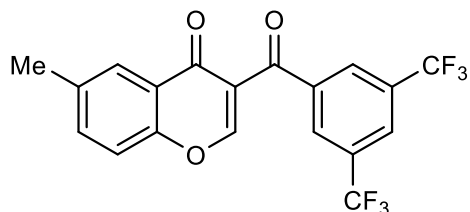

The title compound was prepared starting from an amide **1u** (203 mg, 1 mmol, 1 equiv.), pyrylium tetrafluoroborate **2** (185 mg, 1.1 mmol, 1.1 equiv.),  $\text{BaTiO}_3$  (933 mg, 4 mmol, 4 equiv.), aryl boronic acid **4h** (335 mg, 1.3 mmol, 1.3 equiv.), DABCO (157 mg, 1.4 mmol, 1.4 equiv.) and 1,4-dioxane (0.25 mL). The purification was accomplished by column chromatography on silica gel to provide the desired **3y** (312 mg, 0.78 mmol, 78%).

Yellowish solid, mp 168-169 °C.  $^1\text{H}$  NMR (500 MHz,  $\text{CDCl}_3$ ):  $\delta$  2.49 (s, 3H, Me), 7.48 (d, 1H,  $J = 8.3$  Hz,  $\text{CH}_{\text{Ar}}$ ), 7.58 (dd, 1H,  $J = 8.5$  Hz,  $J = 1.9$  Hz,  $\text{CH}_{\text{Ar}}$ ), 8.01 (br.s, 1H,  $\text{CH}_{\text{Ar}}$ ), 8.07 (s, 1H,  $\text{CH}_{\text{Ar}}$ ), 8.22 (s, 2H,  $\text{CH}_{\text{Ar}}$ ), 8.46 (s, 1H,  $\text{CH}_{\text{Ar}}$ ).

$^{13}\text{C}\{\text{1H}\}$  NMR (125 MHz,  $\text{CDCl}_3$ ):  $\delta$  21.0, 118.2, 122.9 (p,  $^1J_{\text{CF}} = 270.1$  Hz), 123.4, 124.5, 125.8, 126.2 (m), 129.4, 131.8 (q,  $J_{\text{CF}} = 33.8$  Hz), 136.1, 136.9, 139.1, 154.3, 160.6, 174.5, 190.0.

MS (GC, 70eV):  $m/z$  (%) = 400 ( $\text{M}^+$ , 54), 371 (100), 303 (28), 213 (27), 187 (25), 135 (43).

Anal. calcd. for  $\text{C}_{19}\text{H}_{10}\text{F}_6\text{O}_3$ : C, 57.01; H, 2.52. Found: C, 57.12; H, 2.46.

### 6-fluoro-3-(thiophene-2-carbonyl)-4H-chromen-4-one **3z**

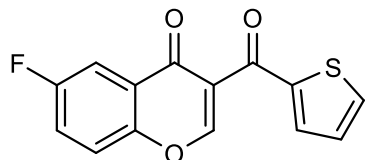

The title compound was prepared starting from an amide **1v** (207 mg, 1 mmol, 1 equiv.), pyrylium tetrafluoroborate **2** (185 mg, 1.1 mmol, 1.1 equiv.),  $\text{BaTiO}_3$  (933 mg, 4 mmol, 4 equiv.), aryl boronic acid **4v** (166 mg, 1.2 mmol, 1.2 equiv.), DABCO (157 mg, 1.4 mmol, 1.4 equiv.) and 1,4-dioxane (0.25 mL). The purification was accomplished by column chromatography on silica gel to provide the desired **3z** (224 mg, 0.82 mmol, 82%).

Yellowish solid, mp 133-134 °C.  $^1\text{H}$  NMR (500 MHz,  $\text{CDCl}_3$ ):  $\delta$  7.14 (br.s, 1H,  $\text{CH}_{\text{Ar}}$ ), 7.46 (br.s, 1H,  $\text{CH}_{\text{Ar}}$ ), 7.55 (br.s, 1H,  $\text{CH}_{\text{Ar}}$ ), 7.72 (m, 2H,  $\text{CH}_{\text{Ar}}$ ), 7.19 (s, 2H,  $\text{CH}_{\text{Ar}}$ ), 8.31 (s, 1H,  $\text{CH}_{\text{Ar}}$ ).

**<sup>13</sup>C{<sup>1</sup>H} NMR** (125 MHz, CDCl<sub>3</sub>): δ 111.5 (d, *J*<sub>CF</sub> = 24.2 Hz), 120.6 (d, *J*<sub>CF</sub> = 8.2 Hz), 122.7 (d, *J*<sub>CF</sub> = 25.5 Hz), 124.6, 126.3 (d, *J*<sub>CF</sub> = 7.9 Hz), 128.3, 135.4, 135.5, 143.6, 152.2, 158.3, 160.1 (d, <sup>1</sup>*J*<sub>CF</sub> = 249 Hz), 173.6, 182.4.

MS (GC, 70eV): *m/z* (%) = 274 (M<sup>+</sup>, 54), 246 (100), 191 (28), 138 (27), 111 (25).

Anal. calcd. for C<sub>14</sub>H<sub>7</sub>FO<sub>3</sub>S: C, 61.31; H, 2.57. Found: C, 61.39; H, 2.63.

### 3-(2,4-difluorobenzoyl)-4H-chromen-4-one 3aa

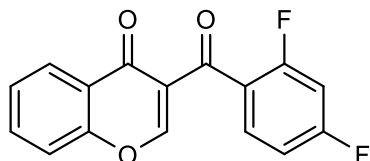

The title compound was prepared starting from an amide **1w** (189 mg, 1 mmol, 1 equiv.), pyrylium tetrafluoroborate **2** (185 mg, 1.1 mmol, 1.1 equiv.), BaTiO<sub>3</sub> (933 mg, 4 mmol, 4 equiv.), aryl boronic acid **4u** (205mg, 1.3 mmol, 1.3 equiv.), DABCO (157 mg, 1.4 mmol, 1.4 equiv.) and 1,4-dioxane (0.25 mL). The purification was accomplished by column chromatography on silica gel to provide the desired **3aa** (234 mg, 0.82 mmol, 82%).

Alternatively, the title compound was prepared starting from an amide **1p** (157 mg, 1 mmol, 1 equiv.), pyrylium tetrafluoroborate **2** (185 mg, 1.1 mmol, 1.1 equiv.), BaTiO<sub>3</sub> (933 mg, 4 mmol, 4 equiv.), aryl boronic acid **4w** (247 mg, 1.3 mmol, 1.3 equiv.), DABCO (157 mg, 1.4 mmol, 1.4 equiv.) and 1,4-dioxane (0.25 mL). The purification was accomplished by column chromatography on silica gel to provide the desired **3aa** (203 mg, 0.71 mmol, 71%).

Yellowish solid, mp 127-128 °C. **<sup>1</sup>H NMR** (500 MHz, CDCl<sub>3</sub>): δ 6.82 (ddd, 1H, *J* = 10.6 Hz, *J* = 8.5 Hz, *J* = 2.3 Hz, CH<sub>Ar</sub>), 6.97 – 7.01 (m, 1H, CH<sub>Ar</sub>), 7.44 – 7.47 (m, 1H, CH<sub>Ar</sub>), 7.52 – 7.54 (m, 1H, CH<sub>Ar</sub>), 7.71 – 7.74 (m, 1H, CH<sub>Ar</sub>), 7.76 – 7.80 (m, 1H, CH<sub>Ar</sub>), 8.21 (dd, 1H, *J* = 8 Hz, *J* = 1.7 Hz, CH<sub>Ar</sub>), 8.43 (s, 1H, CH<sub>Ar</sub>).

**<sup>13</sup>C{<sup>1</sup>H} NMR** (125 MHz, CDCl<sub>3</sub>): δ 104.4 (t, *J*<sub>CF</sub> = 26 Hz), 112 (dd, *J*<sub>CF</sub> = 22 Hz, *J*<sub>CF</sub> = 3.2 Hz), 118.4, 124 (dd, *J*<sub>CF</sub> = 12.5 Hz, *J*<sub>CF</sub> = 3.5 Hz), 124.9, 125.7, 126.3, 126.4, 132.3 (dd, *J*<sub>CF</sub> = 10.6 Hz, *J*<sub>CF</sub> = 3.5 Hz), 134.5, 156, 159.6, 162.1 (dd, <sup>1</sup>*J*<sub>CF</sub> = 256 Hz, *J*<sub>CF</sub> = 12.1 Hz), 165.8 (dd, <sup>1</sup>*J*<sub>CF</sub> = 256 Hz, *J*<sub>CF</sub> = 12.1 Hz), 174.5 (d, *J*<sub>CF</sub> = 2 Hz), 187.4.

MS (GC, 70eV): *m/z* (%) = 286 (M<sup>+</sup>, 95), 267 (49), 257 (100), 239 (60), 173 (44), 141 (72), 113 (59).

Anal. calcd. for C<sub>16</sub>H<sub>8</sub>F<sub>2</sub>O<sub>3</sub>: C, 67.14; H, 2.82. Found: C, 67.31; H, 2.93.

### N-cyclohexyl-3,5-difluorobenzamide 7a IVA



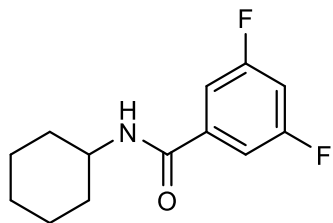

The title compound was prepared starting from a urea **6a** (189 mg, 1 mmol, 1 equiv.), pyrylium tetrafluoroborate **2** (185 mg, 1.1 mmol, 1.1 equiv.), BaTiO<sub>3</sub> (933 mg, 4 mmol, 4 equiv.), aryl boronic acid **4e** (205 mg, 1.3 mmol, 1.3 equiv.), DABCO (157 mg, 1.4 mmol, 1.4 equiv.) and 1,4-dioxane (0.25 mL). The purification was accomplished by column chromatography on silica gel to provide the desired **7a** (181 mg, 0.76 mmol, 76%). The gram scale synthesis was performed on 10 mmol of starting urea **6a** and the product **7a** was prepared 71% in yield (1.70 g, 7.1 mmol).

White solid, mp 138-139 °C. <sup>1</sup>H NMR (500 MHz, CDCl<sub>3</sub>): δ 1.12 (m, 1H, Cyclohexyl), 1.26 – 1.31 (m, 4H, cyclohexyl), 1.58 (m, 1H, Cyclohexyl), 1.71 – 1.81 (m, 4H, Cyclohexyl), 3.73 (m, 1H, CH-Cyclohexyl), 7.40 (tt, 1H, *J* = 9.0 Hz, *J* = 2.4 Hz, CH<sub>Ar</sub>), 7.54 (dq, 2H, *J* = 8.4 Hz, *J* = 2.1 Hz, CH<sub>Ar</sub>), 8.35 (d, 1H, *J* = 8.4 Hz, NH).

<sup>13</sup>C{<sup>1</sup>H} NMR (125 MHz, CDCl<sub>3</sub>): δ 24.5, 25.2, 32.3, 48.7, 106.4 (t, *J*<sub>CF</sub> = 26.6 Hz), 110.5 (t, *J*<sub>CF</sub> = 6.1 Hz), 110.7 (t, *J*<sub>CF</sub> = 6.4 Hz), 138.3 (t, *J*<sub>CF</sub> = 8.1 Hz), 162.2 (dd, <sup>1</sup>*J*<sub>CF</sub> = 246.8 Hz, *J*<sub>CF</sub> = 11.5 Hz),

MS (GC, 70eV): *m/z* (%) = 239 (M<sup>+</sup>, 30), 158 (88), 141 (100), 113 (41).

Anal. calcd. for C<sub>13</sub>H<sub>15</sub>F<sub>2</sub>ON: C, 65.36; H, 6.32; N, 5.85. Found: C, 65.29; H, 6.19; N, 5.93.

### N-benzyl-[1,1'-biphenyl]-4-carboxamide **7b**

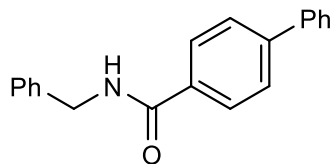

The title compound was prepared starting from a urea **6b** (150 mg, 1 mmol, 1 equiv.), pyrylium tetrafluoroborate **2** (185 mg, 1.1 mmol, 1.1 equiv.), BaTiO<sub>3</sub> (933 mg, 4 mmol, 4 equiv.), aryl boronic acid **4x** (257 mg, 1.3 mmol, 1.3 equiv.), DABCO (157 mg, 1.4 mmol, 1.4 equiv.) and 1,4-dioxane (0.25 mL). The purification was accomplished by column chromatography on silica gel to provide the desired **7b** (227 mg, 0.79 mmol, 79%).

White solid, mp 181-182 °C. <sup>1</sup>H NMR (500 MHz, DMSO-*d*<sub>6</sub>): δ 4.53 (d, 2H, *J* = 6.0 Hz, CH<sub>2</sub>), 7.25 (m, 1H, CH<sub>Ar</sub>), 7.32 – 7.36 (m, 4H, CH<sub>Ar</sub>), 7.40 (t, 1H, *J* = 7.5 Hz, CH<sub>Ar</sub>), 7.49 (t, 2H, *J* = 7.5 Hz, CH<sub>Ar</sub>), 7.72 (d, 2H, *J* = 7.4 Hz, CH<sub>Ar</sub>), 7.79 (d, 2H, *J* = 8.5 Hz, CH<sub>Ar</sub>), 8.05 (d, 2H, *J* = 8.3 Hz, CH<sub>Ar</sub>), 9.15 (t, 1H, *J* = 6.0 Hz, NH).

<sup>13</sup>C{<sup>1</sup>H} NMR (125 MHz, DMSO-*d*<sub>6</sub>): δ 42.6, 126.6, 126.7, 126.9, 127.2, 128.0, 128.1, 128.3, 129.0, 133.1, 139.2, 139.2, 139.7, 142.8.

MS (GC, 70eV): *m/z* (%) = 287 (M<sup>+</sup>, 71), 181 (100), 152 (51).

Anal. calcd. for C<sub>20</sub>H<sub>17</sub>ON: C, 83.59; H, 5.96; N, 4.87. Found: C, 83.62; H, 6.02; N, 4.77.

### N-(4-iodophenyl)-2-methoxybenzamide **7c**

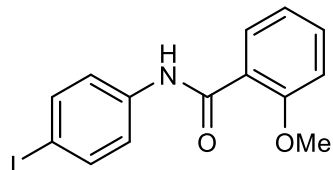

The title compound was prepared starting from a urea **6c** (262 mg, 1 mmol, 1 equiv.), pyrylium tetrafluoroborate **2** (185 mg, 1.1 mmol, 1.1 equiv.), BaTiO<sub>3</sub> (933 mg, 4 mmol, 4 equiv.), aryl boronic acid **4y** (197 mg, 1.3 mmol, 1.3 equiv.), DABCO (157 mg, 1.4 mmol, 1.4 equiv.) and 1,4-dioxane (0.25 mL). The purification was accomplished by column chromatography on silica gel to provide the desired **7c** (261 mg, 0.74 mmol, 74%).

White solid, mp 125-126 °C. <sup>1</sup>H NMR (500 MHz, CDCl<sub>3</sub>): δ 4.01 (s, 3H, OMe), 6.98 (d, 1H, *J* = 8.4 Hz, CH<sub>Ar</sub>), 7.10 (t, 1H, *J* = 7.6 Hz, CH<sub>Ar</sub>), 7.44-7.49 (m, 3H, CH<sub>Ar</sub>), 7.61 (d, 2H, *J* = 8.4 Hz, CH<sub>Ar</sub>), 8.22 (dd, 1H, *J* = 7.8 Hz, *J* = 1.5 Hz, CH<sub>Ar</sub>), 9.80 (s, 1H, NH).

<sup>13</sup>C{<sup>1</sup>H} NMR (125 MHz, CDCl<sub>3</sub>): δ 56.2, 87.1, 114.4, 121.2, 121.6, 122.1, 132.3, 133.4, 137.7, 138.1, 157.0, 163.2.

MS (GC, 70eV): *m/z* (%) = 353 (M<sup>+</sup>, 44), 135 (100).

Anal. calcd. for C<sub>16</sub>H<sub>12</sub>O<sub>2</sub>NI: C, 47.61; H, 3.43; N, 3.97. Found: C, 47.52; H, 3.35; N, 4.01.

### N-(3,5-dimethoxyphenyl)-3,4-difluorobenzamide **7d**

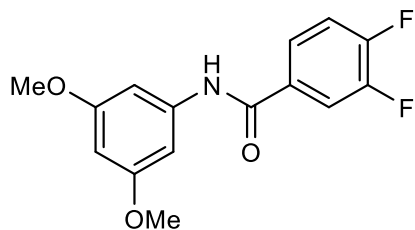

The title compound was prepared starting from a urea **6d** (196 mg, 1 mmol, 1 equiv.), pyrylium tetrafluoroborate **2** (185 mg, 1.1 mmol, 1.1 equiv.), BaTiO<sub>3</sub> (933 mg, 4 mmol, 4 equiv.), aryl boronic acid **4z** (205 mg, 1.3 mmol, 1.3 equiv.), DABCO (157 mg, 1.4 mmol, 1.4 equiv.) and 1,4-dioxane (0.25 mL). The purification was accomplished by column chromatography on silica gel to provide the desired **7d** (231 mg, 0.79 mmol, 79%). The gram scale synthesis was performed on 10 mmol of starting urea **6d** and the product **7d** was prepared 72% in yield (2.11 g, 7.2 mmol).

Yellowish solid, mp 112-113 °C. <sup>1</sup>H NMR (500 MHz, DMSO-*d*<sub>6</sub>): δ 3.70 (s, 6H, 2xOMe), 6.24 (t, 1H, *J* = 2.1 Hz, CH<sub>Ar</sub>), 7.02 (d, 2H, *J* = 2.1 Hz, CH<sub>Ar</sub>), 7.52-7.58 (m, 1H, CH<sub>Ar</sub>), 7.81 (m, 1H, CH<sub>Ar</sub>), 7.95 – 8.00 (m, 1H, CH<sub>Ar</sub>), 10.17 (s, 1H, NH).

<sup>13</sup>C{<sup>1</sup>H} NMR (125 MHz, CDCl<sub>3</sub>): δ 55.1, 96.0, 98.6, 117.4 (dd, *J*<sub>CF</sub> = 54.1 Hz, *J*<sub>CF</sub> = 18.6 Hz), 125.2 (m), 132.2 (m), 140.5, 149.2 (dd, <sup>1</sup>*J*<sub>CF</sub> = 245.6 Hz, *J*<sub>CF</sub> = 14.5 Hz), 151.4 (dd, <sup>1</sup>*J*<sub>CF</sub> = 253.5 Hz, *J*<sub>CF</sub> = 10.5 Hz), 160.4, 163.2.

MS (GC, 70eV):  $m/z$  (%) = 293 ( $M^+$ , 48), 141 (100), 113 (39).

Anal. calcd. for  $C_{15}H_{13}O_3NF$ : C, 61.43; H, 4.47; N, 4.78. Found: C, 61.53; H, 4.41; N, 4.89.

### (3-hydroxyphenyl)(piperidin-1-yl)methanone **7e**

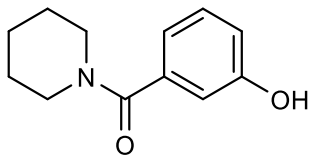

The title compound was prepared starting from a urea **6e** (128 mg, 1 mmol, 1 equiv.), pyrylium tetrafluoroborate **2** (185 mg, 1.1 mmol, 1.1 equiv.),  $BaTiO_3$  (933 mg, 4 mmol, 4 equiv.), aryl boronic acid **4aa** (179 mg, 1.3 mmol, 1.3 equiv.), DABCO (157 mg, 1.4 mmol, 1.4 equiv.) and 1,4-dioxane (0.25 mL). The purification was accomplished by column chromatography on silica gel to provide the desired **7e** (147 mg, 0.72 mmol, 72%).

Yellowish solid, mp 120-122 °C.  $^1H$  NMR (400 MHz,  $DMSO-d_6$ ):  $\delta$  1.49 (s, 2H, piperidyl), 1.66 (s, 2H, piperidyl), 3.34 (s, 2H, piperidyl), 3.70 (s, 2H, piperidyl), 6.79 (t, 2H,  $J = 6.6$  Hz,  $CH_{Ar}$ ), 6.95 (s, 1H,  $CH_{Ar}$ ), 7.14-7.18 (m, 1H,  $CH_{Ar}$ ), 8.22 (s, 1H, OH).

$^{13}C\{^1H\}$  NMR (100 MHz,  $CDCl_3$ ):  $\delta$  24.5, 26.6, 26.5, 43.3, 48.9, 114.6, 117.2, 117.5, 129.4, 136.6, 157.1, 170.8.

MS (GC, 70eV):  $m/z$  (%) = 205 ( $M^+$ , 39), 204 (100), 121 (76).

Anal. calcd. for  $C_{12}H_{15}O_2N$ : C, 70.22; H, 7.37; N, 6.82. Found: C, 70.28; H, 7.31; N, 6.78.

### N,N-dibenzyl-4-fluorobenzamide **8**

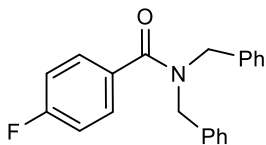

The title compound was prepared starting from the freshly prepared pyridinium salt (289 mg, 1 mmol, 1 equiv.), pyrylium tetrafluoroborate **2** (185 mg, 1.1 mmol, 1.1 equiv.),  $BaTiO_3$  (933 mg, 4 mmol, 4 equiv.), freshly sublimated DABCO (157 mg, 1.4 mmol, 1.4 equiv.) and freshly distilled 1,4-dioxane (0.25 mL). Afterwards, dibenzylamine (296 mg, 1.5 mmol, 1.5 equiv.) The purification was accomplished by column chromatography on silica gel to provide the desired **8** (258 mg, 0.81 mmol, 81%).

Yellowish solid, mp 86-87 °C.  $^1H$  NMR (500 MHz,  $DMSO-d_6$ ):  $\delta$  4.40 (s, 2H,  $CH_2$ ), 4.58 (s, 2H,  $CH_2$ ), 7.15 – 7.36 (m, 12H,  $CH_{Ar}$ ), 7.52 – 7.55 (m, 2H,  $CH_{Ar}$ ).

$^{13}C\{^1H\}$  NMR (125 MHz,  $DMSO-d_6$ ):  $\delta$  47.1, 51.6, 115.5 (d,  $J_{CF} = 21.7$  Hz), 126.8 (m), 127.3 (m), 127.6 (m), 128.7 (m), 129.0 (d,  $J_{CF} = 8.3$  Hz), 132.5 (m), 136.5 (m), 137.0 (m), 162.5 (d,  $^1J_{CF} = 247.1$  Hz), 170.3.

MS (GC, 70eV):  $m/z$  (%) = 319 ( $M^+$ , 3), 228 (39), 123 (100).

Anal. calcd. for  $C_{21}H_{18}ONF$ : C, 78.98; H, 5.68; N, 4.39. Found: C, 79.11; H, 5.79; N, 4.23.

**(C) Copies  $^1\text{H}$  and  $^{13}\text{C}$  NMR spectra**

# Compound 3a

SpinWorks 4: SVS 381 1H CDCI3

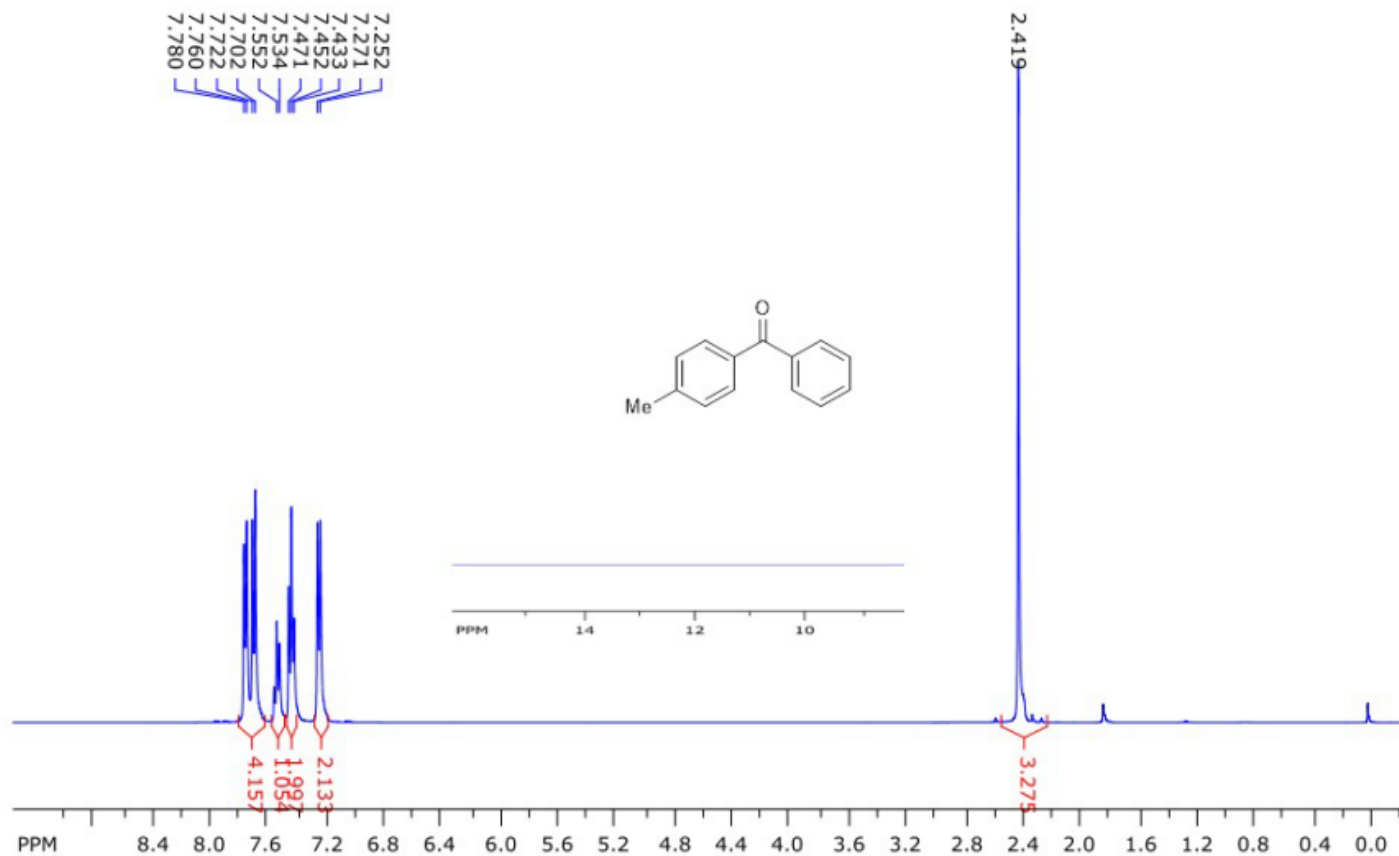

file: D:\NAPO\NMR\JELA\nmr\jn-381\2\fid expt: <zg30>  
transmitter freq.: 400.132471 MHz  
time domain size: 65536 points  
width: 8196.72 Hz = 20.4850 ppm = 0.125072 Hz/pt  
number of scans: 16

freq. of 0 ppm: 400.130014 MHz  
processed size: 65536 complex points  
LB: 0.300 GF: 0.0000  
Hz/cm: 154.867 ppm/cm: 0.38704

# Compound 3a

SpinWorks 4:

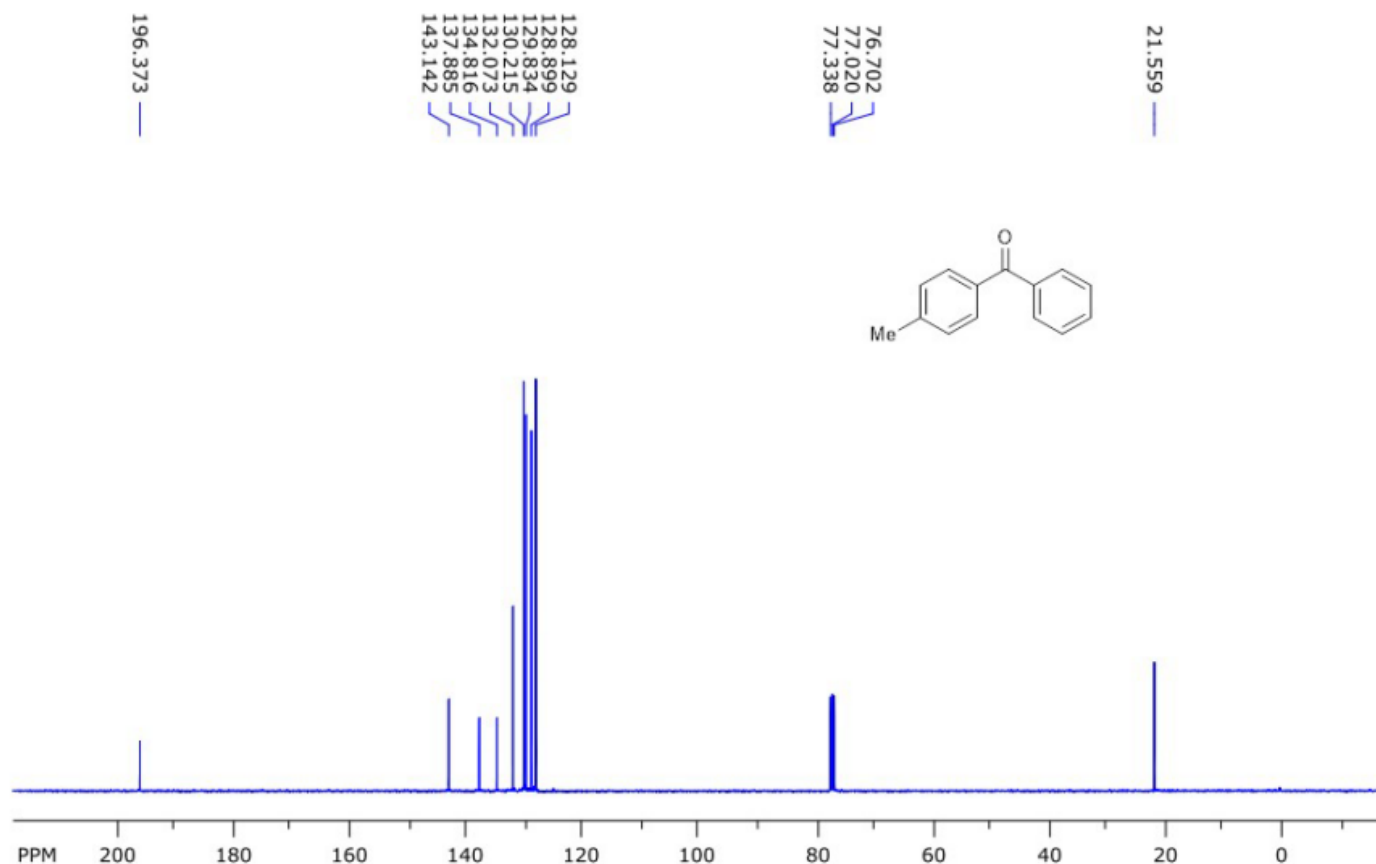

file: D:\NAPO\NMR\JELA\nmr\jn-381\1\fid expt: <zgpg30>  
transmitter freq.: 100.622830 MHz  
time domain size: 65536 points  
width: 23809.52 Hz = 236.6215 ppm = 0.363305 Hz/pt  
number of scans: 1100

freq. of 0 ppm: 100.612778 MHz  
processed size: 32768 complex points  
LB: 1.000 GF: 0.0000  
Hz/cm: 952.381 ppm/cm: 9.46486

# Compound 3b

SpinWorks 4: SVS 380 1H CDCl3

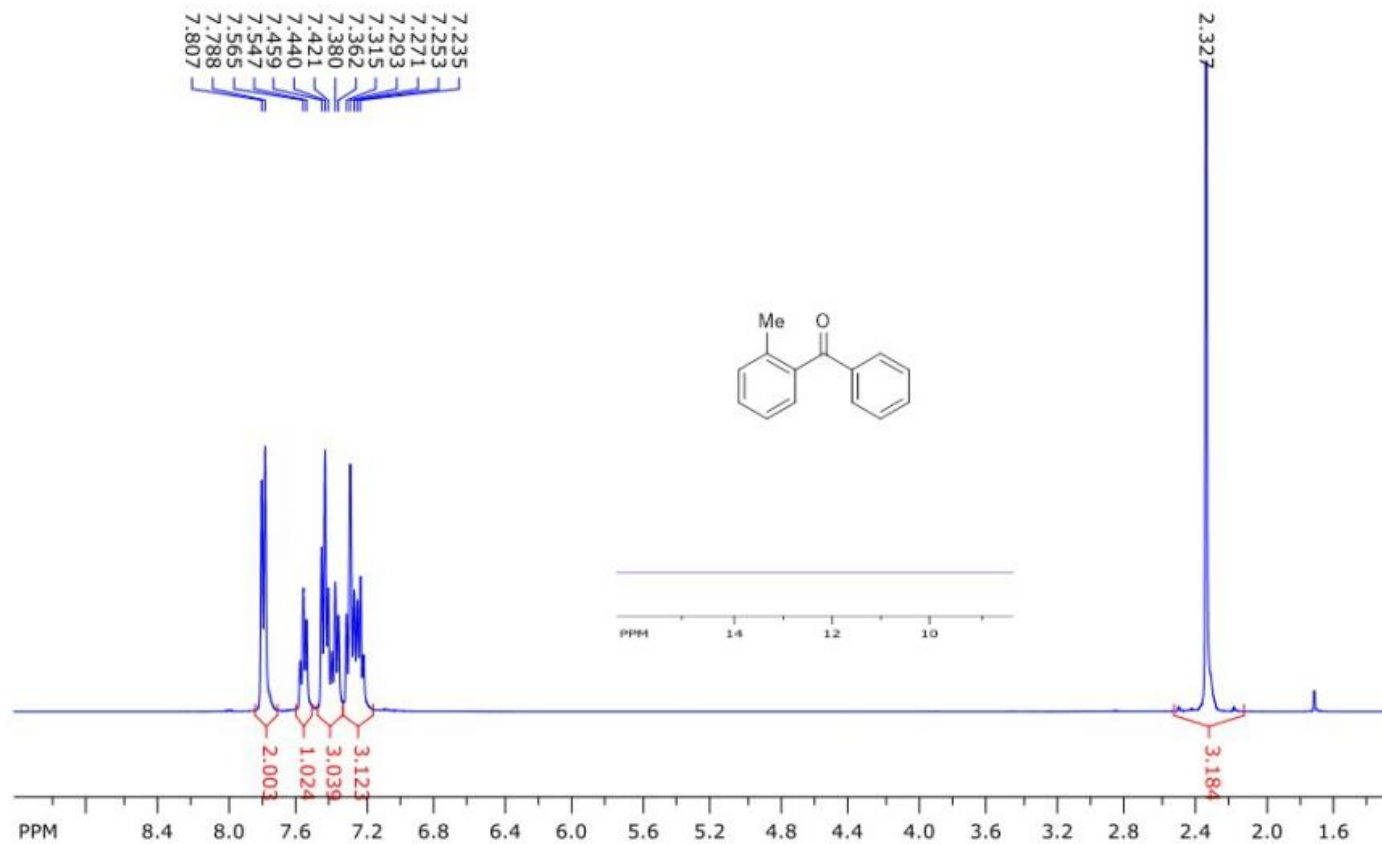

file: D:\NAPO\NMR\JELA\nmr\jn-380\3\fid expt: <zg30>  
transmitter freq.: 400.132471 MHz  
time domain size: 65536 points  
width: 8196.72 Hz = 20.4850 ppm = 0.125072 Hz/pt  
number of scans: 16

freq. of 0 ppm: 400.130014 MHz  
processed size: 65536 complex points  
LB: 0.300 GF: 0.0000  
Hz/cm: 127.666 ppm/cm: 0.31906

# Compound 3b

SpinWorks 4:

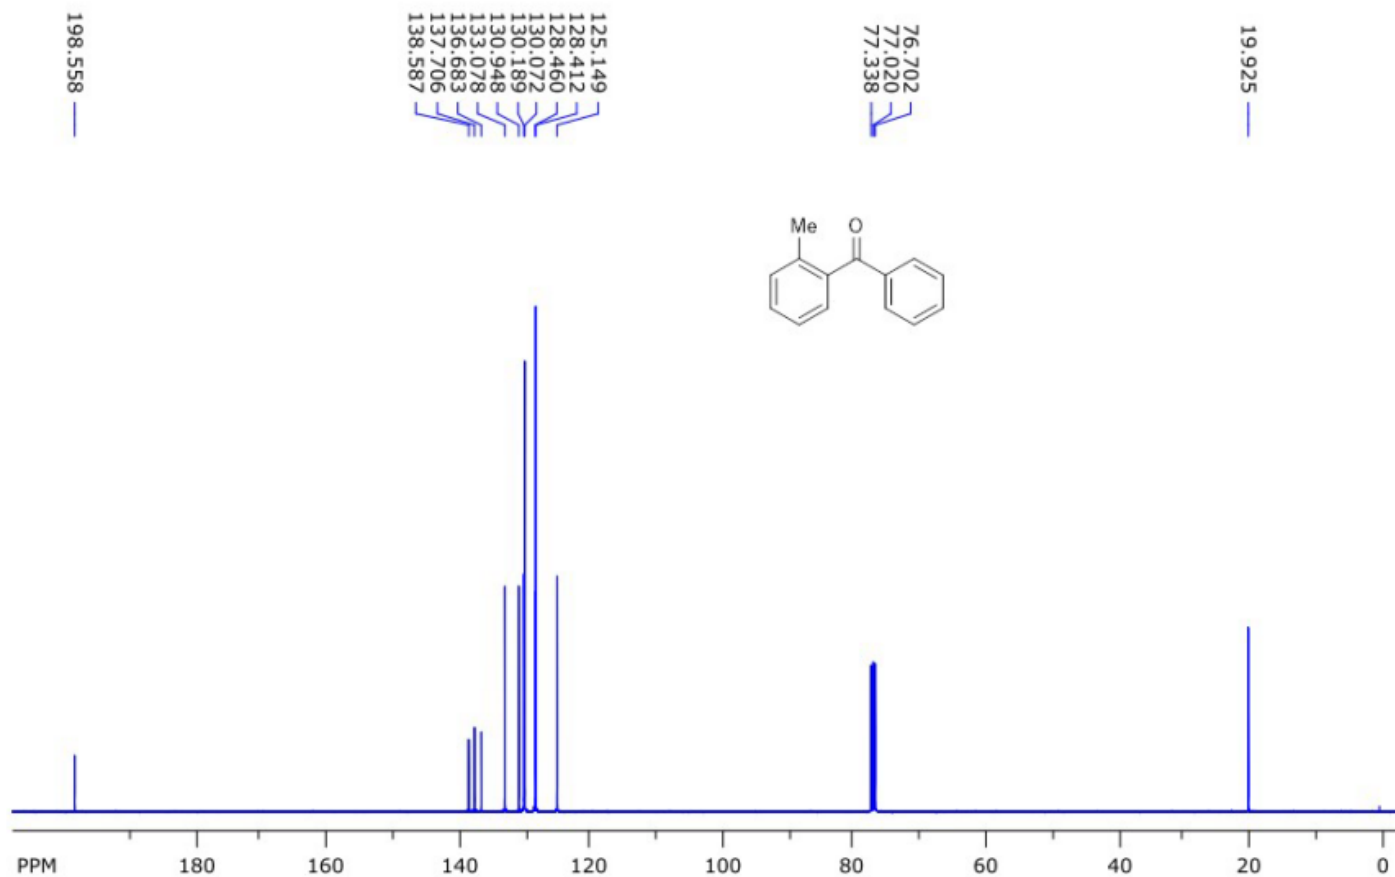

file: D:\NAPO\NMR\JELA\nmr\jn-380\1\fid expt: <zpgg30>  
transmitter freq.: 100.622830 MHz  
time domain size: 65536 points  
width: 23809.52 Hz = 236.6215 ppm = 0.363305 Hz/pt  
number of scans: 1024

freq. of 0 ppm: 100.612774 MHz  
processed size: 32768 complex points  
LB: 1.000 GF: 0.0000  
Hz/cm: 853.350 ppm/cm: 8.48068



# Compound 3c

SpinWorks 4: IVA 1951 1H CDCI3

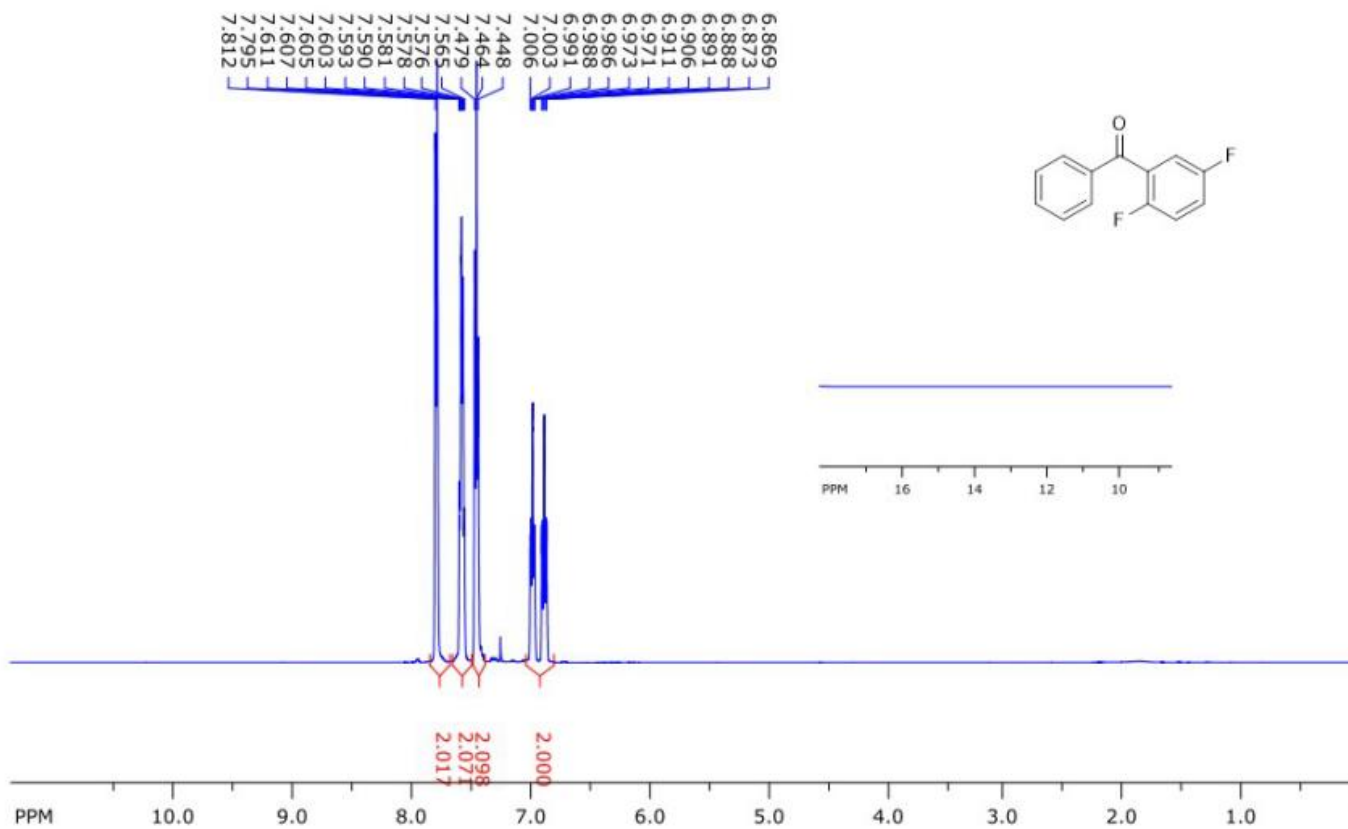

file: D:\NAPO\NMR\500-2\mkr10603\11\fid exp: <zg30>  
transmitter freq.: 500.133001 MHz  
time domain size: 65536 points  
width: 12335.53 Hz = 24.6645 ppm = 0.188225 Hz/pt  
number of scans: 24

freq. of 0 ppm: 500.130022 MHz  
processed size: 65536 complex points  
LB: 0.300 GF: 0.0000  
Hz/cm: 228.698 ppm/cm: 0.45728

# Compound 3c

SpinWorks 4: IVA 1951 13C CDCL3

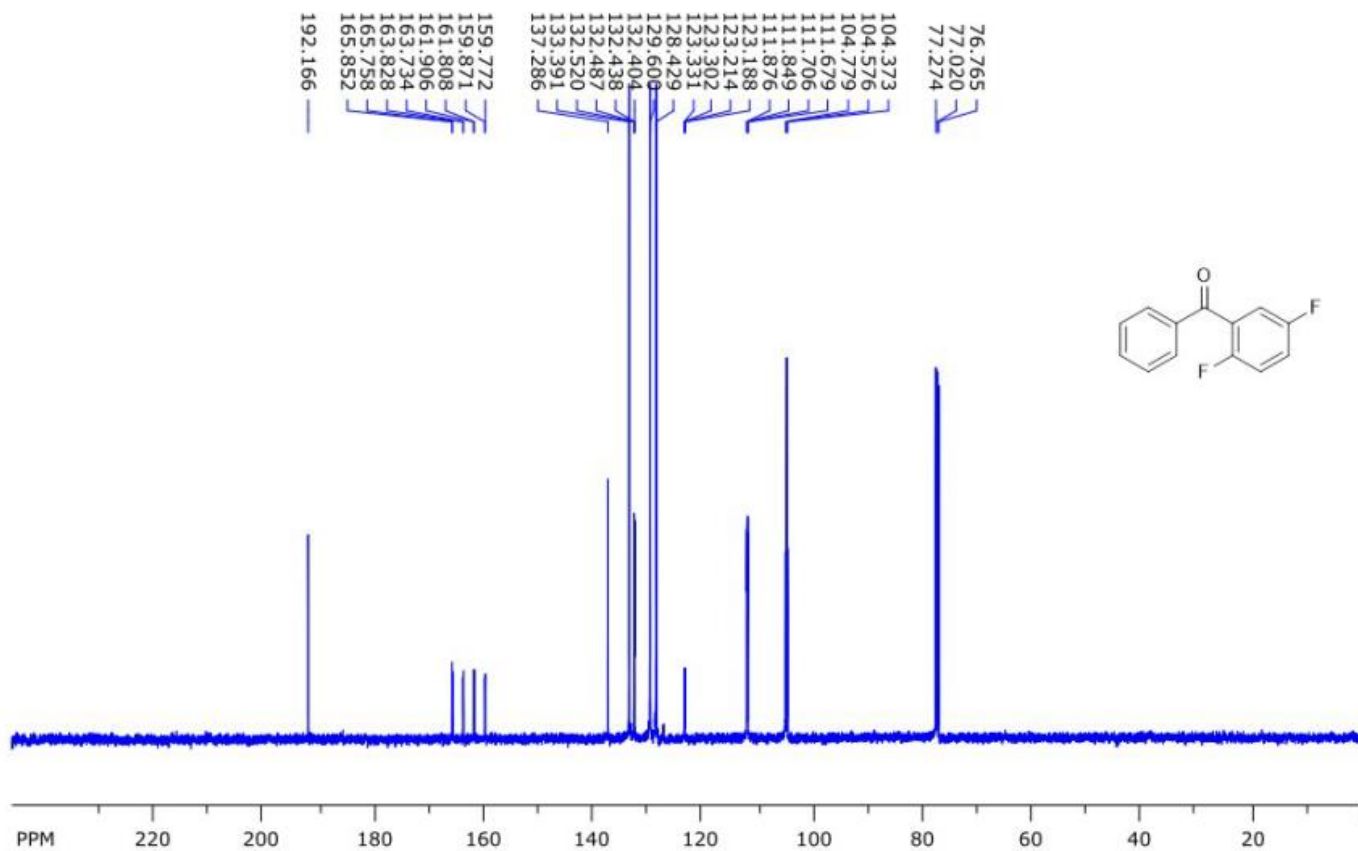

file: D:\NAPO\NMR\500-2\mkr10603\12\fid expt: <zgpg30>  
transmitter freq.: 125.772879 MHz  
time domain size: 65536 points  
width: 36057.69 Hz = 286.6889 ppm = 0.550197 Hz/pt  
number of scans: 512

freq. of 0 ppm: 125.757802 MHz  
processed size: 32768 complex points  
LB: 2.000 GF: 0.0000  
Hz/cm: 1242.874 ppm/cm: 9.88189

# Compound 3d

SpinWorks 4: IVA 1595 1H DMSO

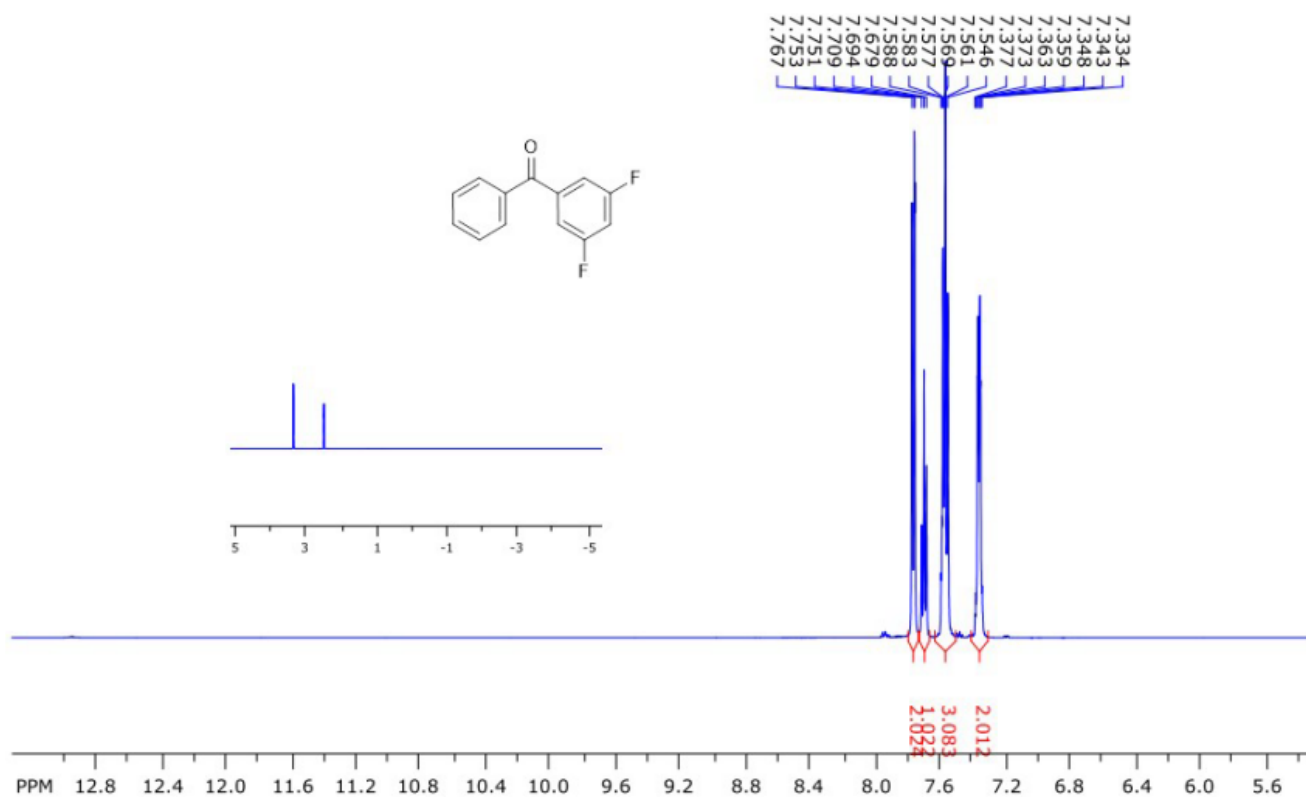

file: ...APO\NMR\500-2\mkr11607\23 1595\fid expt: <zg30>  
transmitter freq.: 500.133001 MHz  
time domain size: 65536 points  
width: 12335.53 Hz = 24.6645 ppm = 0.188225 Hz/pt  
number of scans: 24

freq. of 0 ppm: 500.132390 MHz  
processed size: 65536 complex points  
LB: 0.300 GF: 0.0000  
Hz/cm: 160.471 ppm/cm: 0.32086

# Compound 3d

SpinWorks 4: IVA 1595 13C DMSO

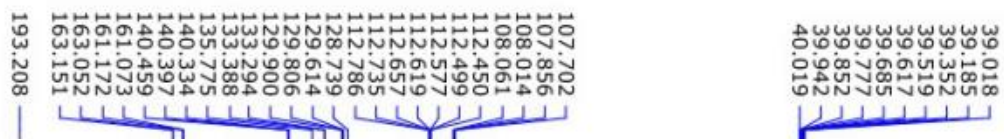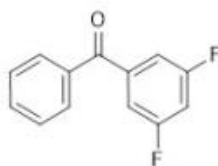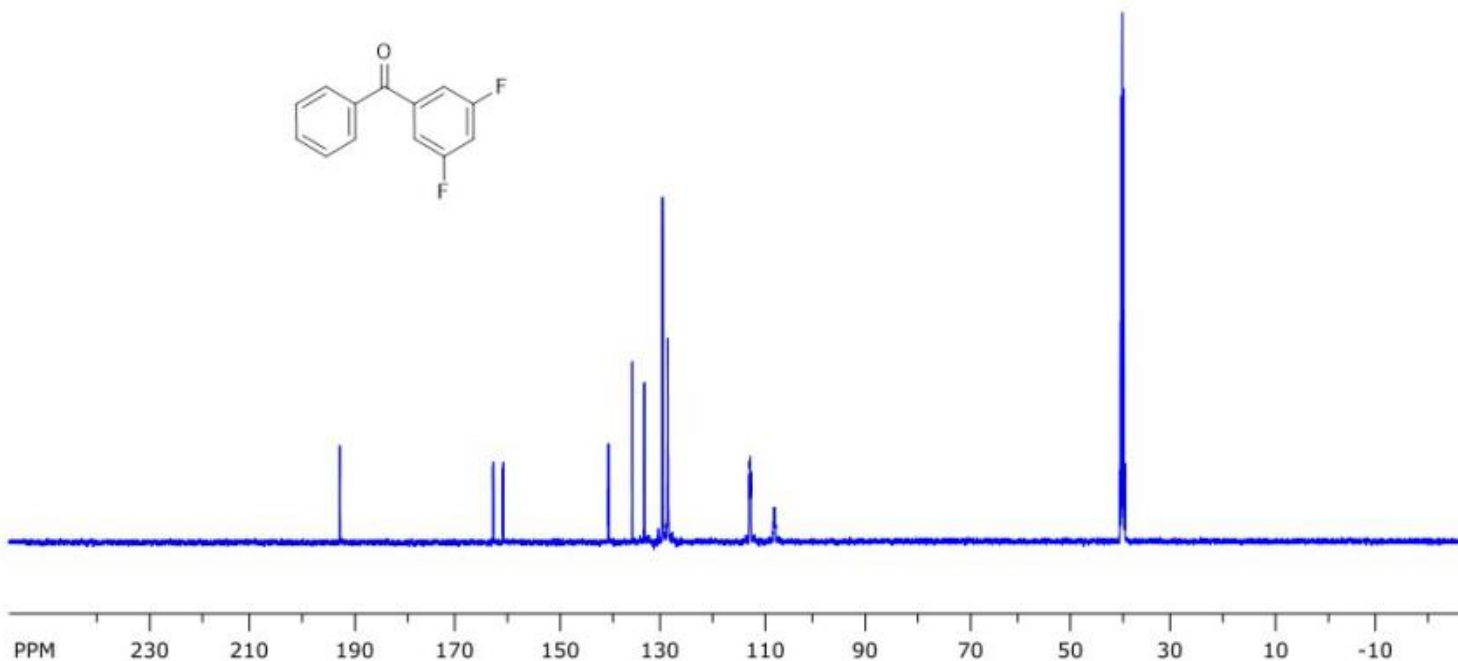

file: D:\NAPO\NMR\500-2\mkr11607\24\fid expt: <zgpg30>  
transmitter freq.: 125.772879 MHz  
time domain size: 65536 points  
width: 36057.69 Hz = 286.6889 ppm = 0.550197 Hz/ppm  
number of scans: 512

freq. of 0 ppm: 125.758442 MHz  
processed size: 32768 complex points  
LB: 2.000 GF: 0.0000  
Hz/cm: 1442.308 ppm/cm: 11.46756

# Compound 3e

SpinWorks 4: SVS 215 1H CDCl3

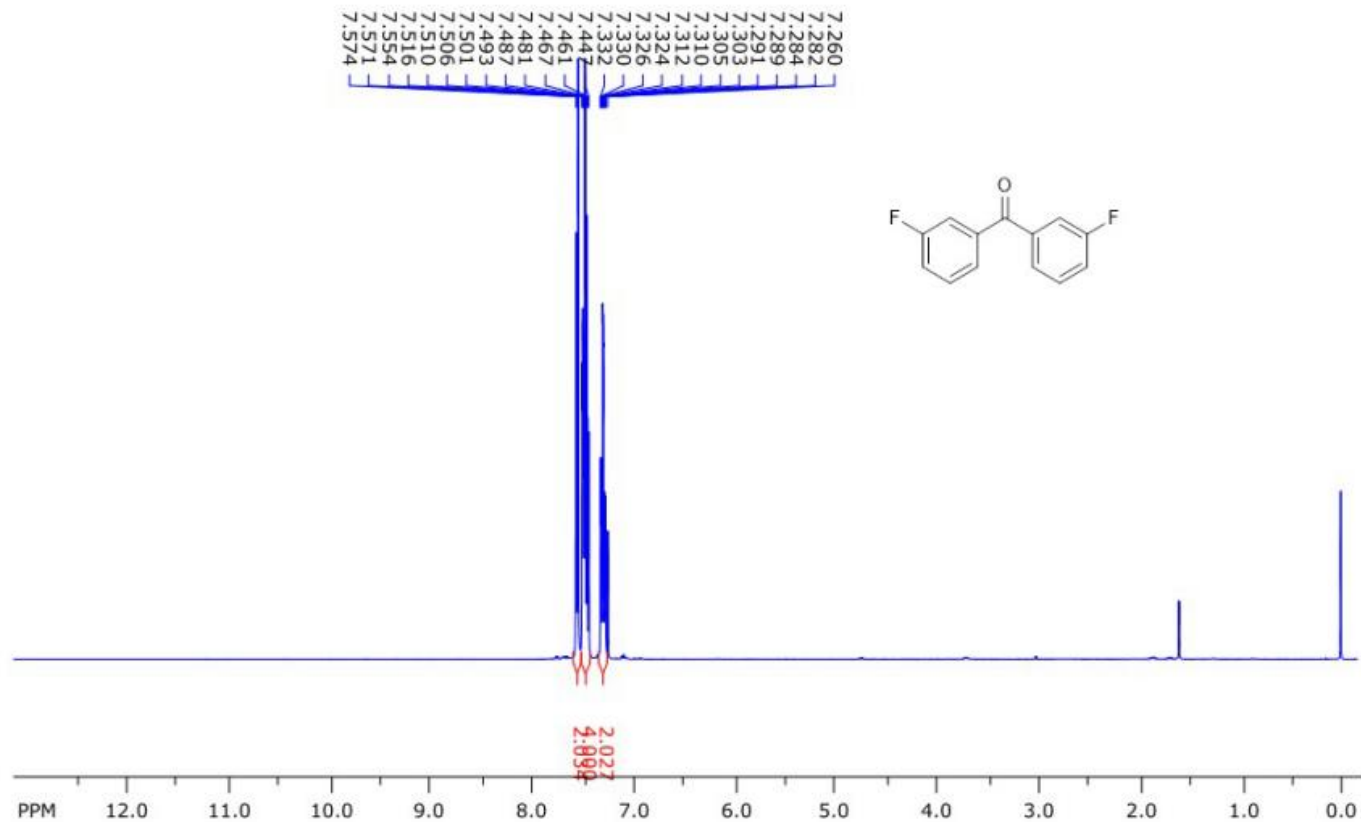

file: D:\NAPO\NMR\JELA\nmr\jn-215\1\fid expt: <zg30>  
transmitter freq.: 400.132471 MHz  
time domain size: 65536 points  
width: 8196.72 Hz = 20.4850 ppm = 0.125072 Hz/pt  
number of scans: 16

freq. of 0 ppm: 400.130009 MHz  
processed size: 65536 complex points  
LB: 0.300 GF: 0.0000  
Hz/cm: 213.213 ppm/cm: 0.53286

# Compound 3e

SpinWorks 4: SVS 215 13C CDCl3

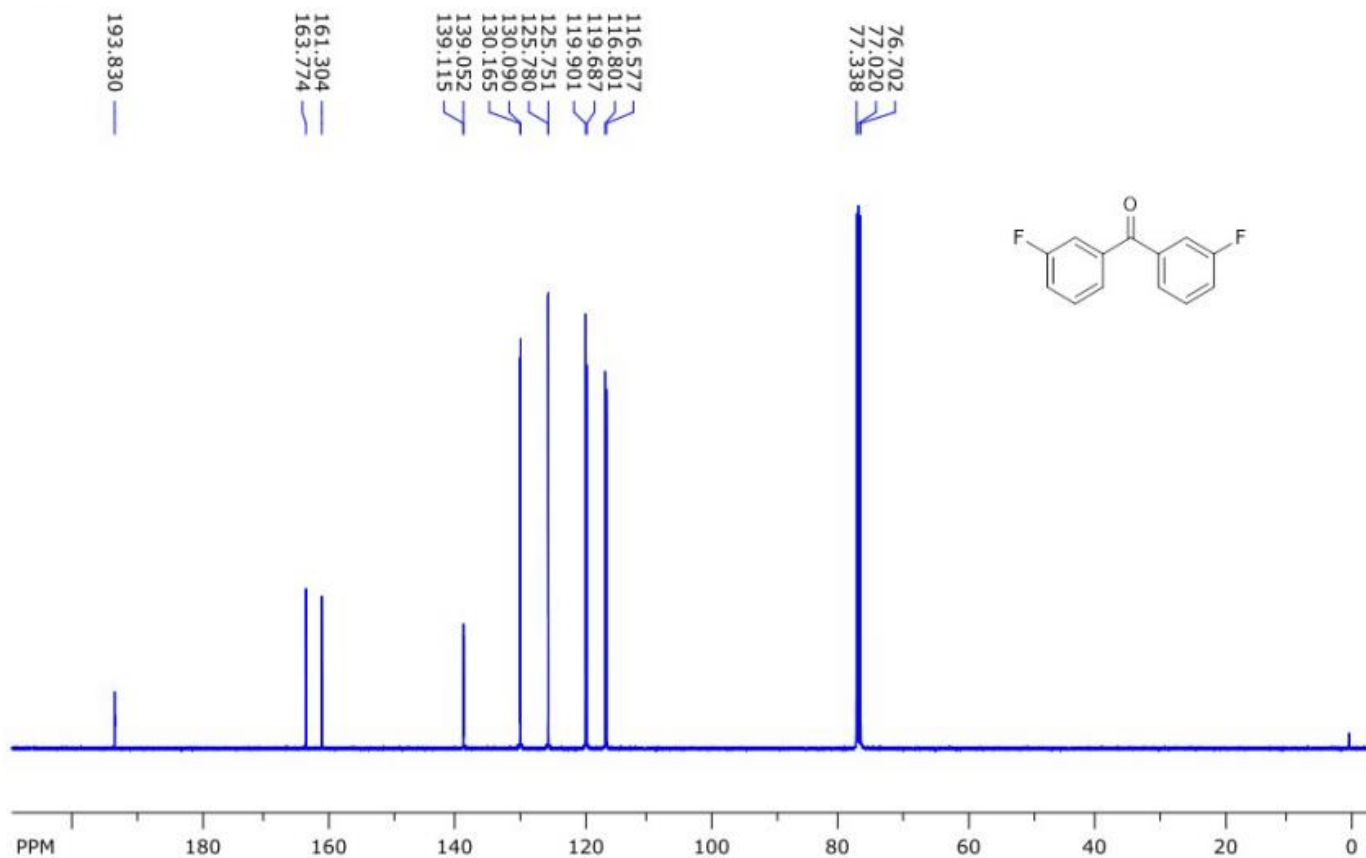

file: D:\NAPO\NMR\JELA\nmr\jn-215\2\fid expt: <zpgg30>  
transmitter freq.: 100.622830 MHz  
time domain size: 65536 points  
width: 23809.52 Hz = 236.6215 ppm = 0.363305 Hz/pt  
number of scans: 3000

freq. of 0 ppm: 100.612768 MHz  
processed size: 32768 complex points  
LB: 1.000 GF: 0.0000  
Hz/cm: 860.769 ppm/cm: 8.55441

# Compound 3f

SpinWorks 4: SVS 306 1H CDCl3

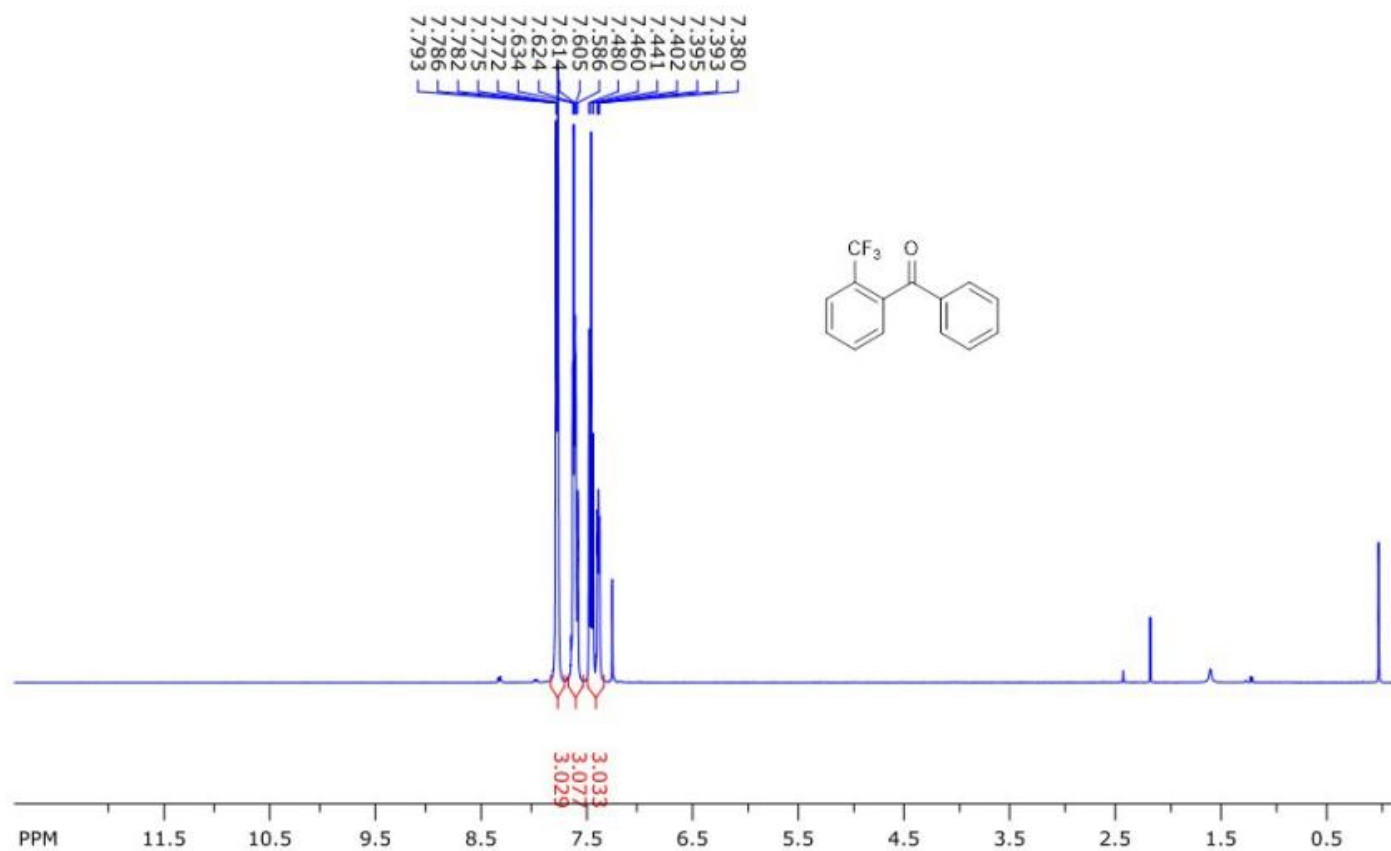

file: D:\NAPO\NMR\JELA\nmr\jn-306\1\fid expt: <zg30>  
transmitter freq.: 400.132471 MHz  
time domain size: 65536 points  
width: 8196.72 Hz = 20.4850 ppm = 0.125072 Hz/pt  
number of scans: 16

freq. of 0 ppm: 400.130009 MHz  
processed size: 65536 complex points  
LB: 0.300 GF: 0.0000  
Hz/cm: 209.928 ppm/cm: 0.52465

# Compound 3f

SpinWorks 4: SVS 306 13C CDCl3

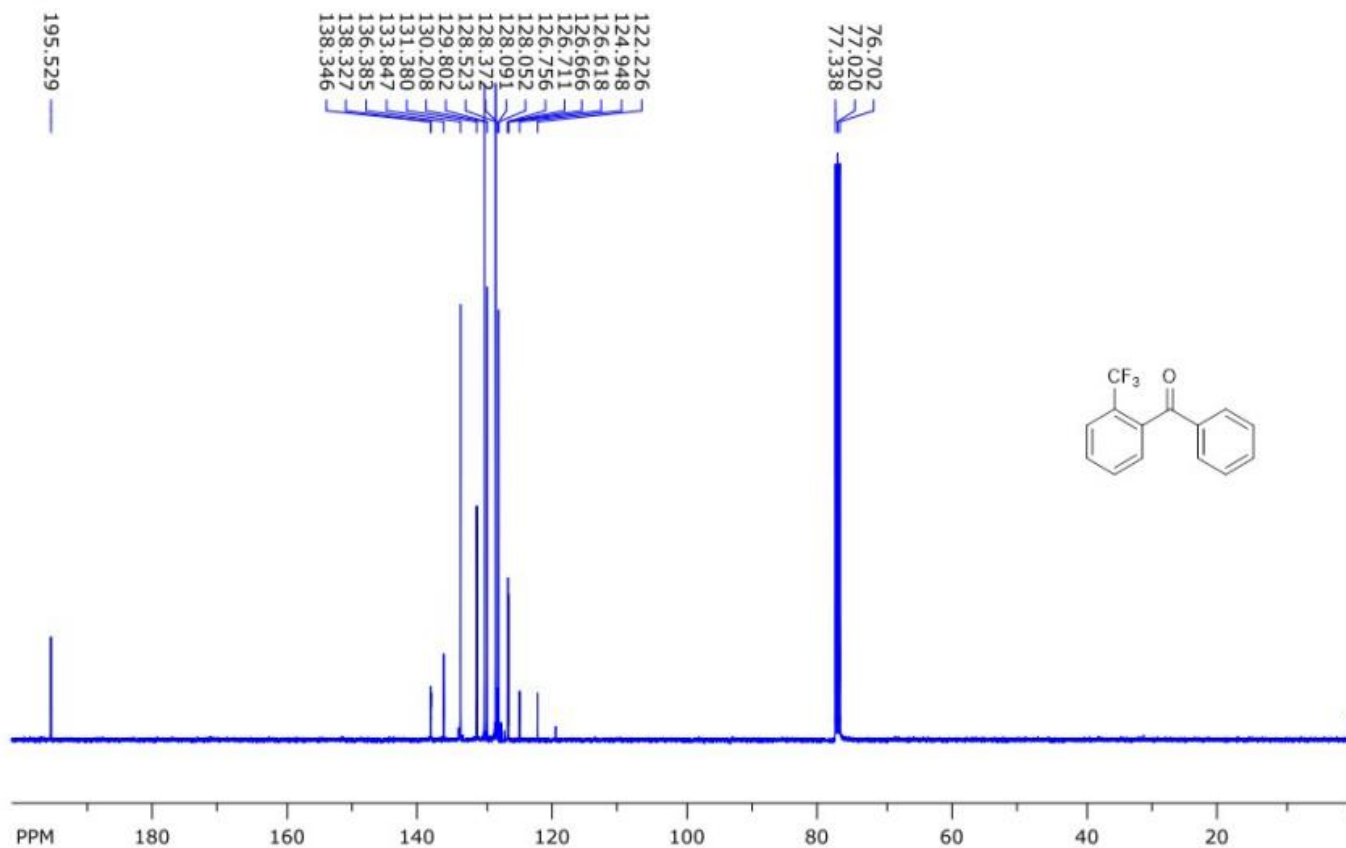

file: D:\NAPO\NMR\JELA\nmr\j-n-306\2\fid exp: <zpgg30>  
transmitter freq.: 100.622830 MHz  
time domain size: 65536 points  
width: 23809.52 Hz = 236.6215 ppm = 0.363305 Hz/pt  
number of scans: 2000

freq. of 0 ppm: 100.612769 MHz  
processed size: 32768 complex points  
LB: 1.000 GF: 0.0000  
Hz/cm: 815.918 ppm/cm: 8.10867



# Compound 3g

SpinWorks 4: IVA 1880 1H CDCl3

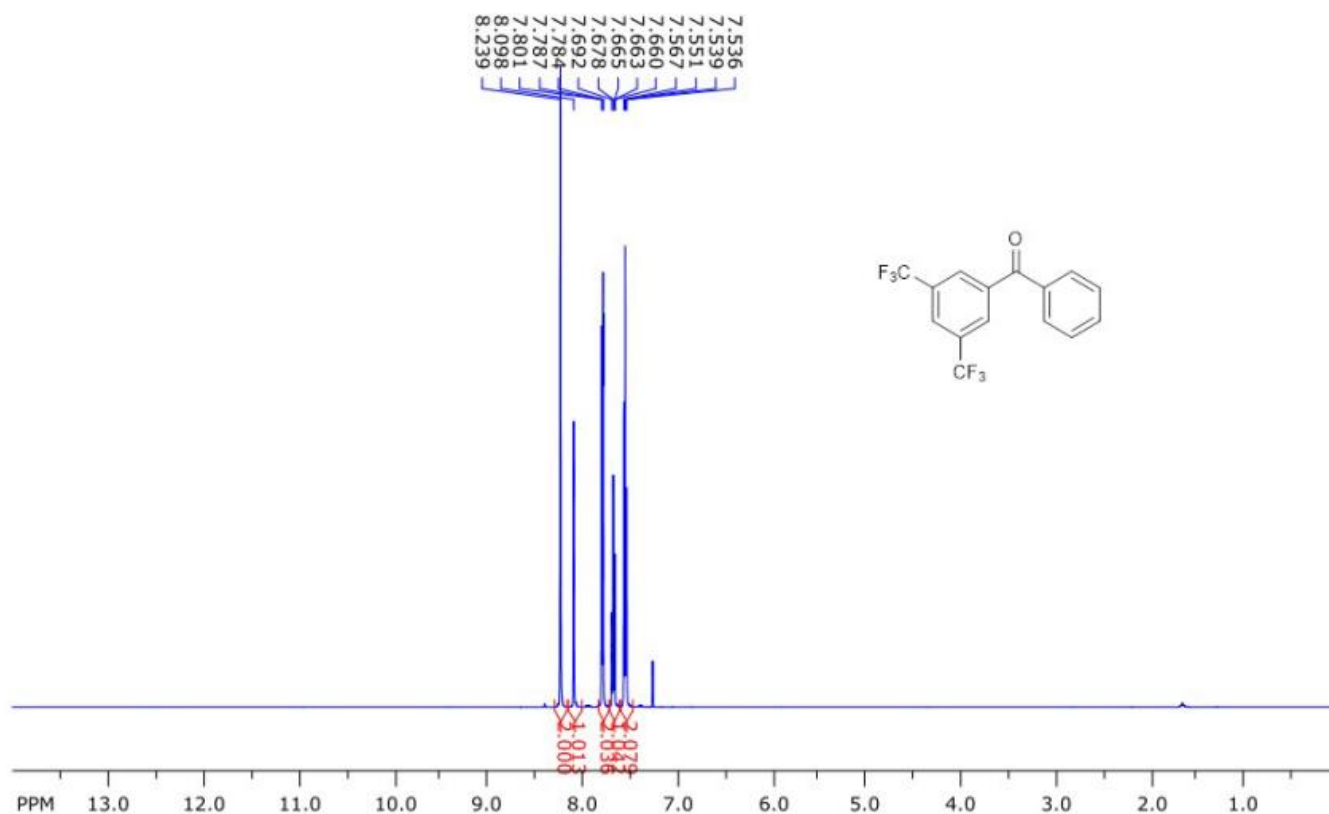

file: ...ketones\Fids part 1\IVA 1880\5\fid expt: <zg30>  
transmitter freq.: 500.133001 MHz  
time domain size: 65536 points  
width: 12335.53 Hz = 24.6645 ppm = 0.188225 Hz/pt  
number of scans: 24

freq. of 0 ppm: 500.127638 MHz  
processed size: 65536 complex points  
LB: 0.300 GF: 0.0000  
Hz/cm: 281.814 ppm/cm: 0.56348

# Compound 3g

SpinWorks 4: IVA 1880 13C CDCL3

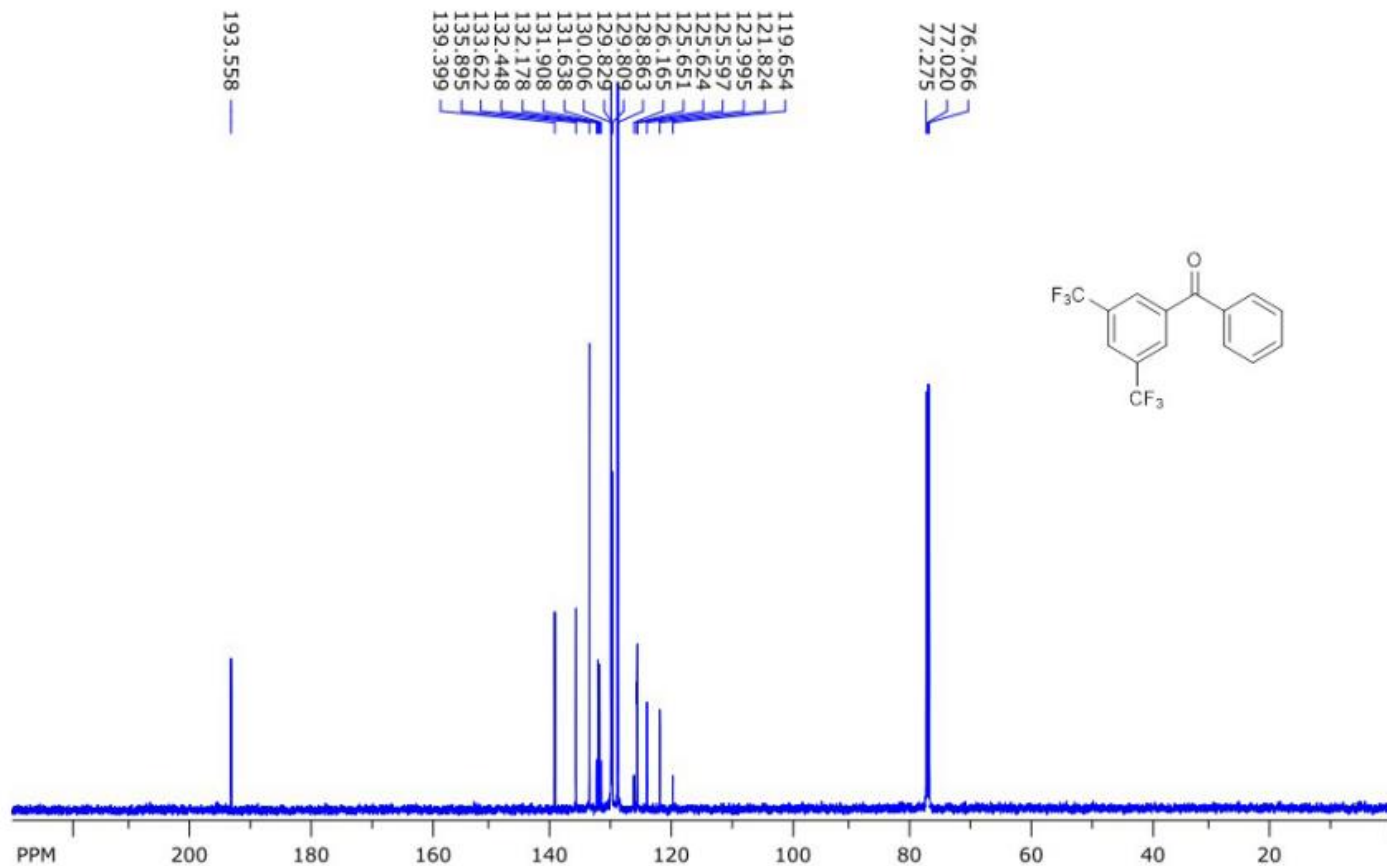

file: ...ketones\Fids part 1\IVA 1880\6\fid expt: <zgpg30>  
transmitter freq.: 125.772879 MHz  
time domain size: 65536 points  
width: 36057.69 Hz = 286.6889 ppm = 0.550197 Hz/pt  
number of scans: 512

freq. of 0 ppm: 125.757190 MHz  
processed size: 32768 complex points  
LB: 2.000 GF: 0.0000  
Hz/cm: 1160.494 ppm/cm: 9.22690

# Compound 3h

SpinWorks 4: SVS 218 1H CDCl3

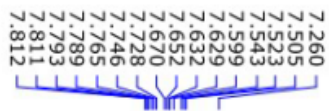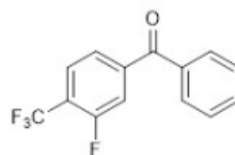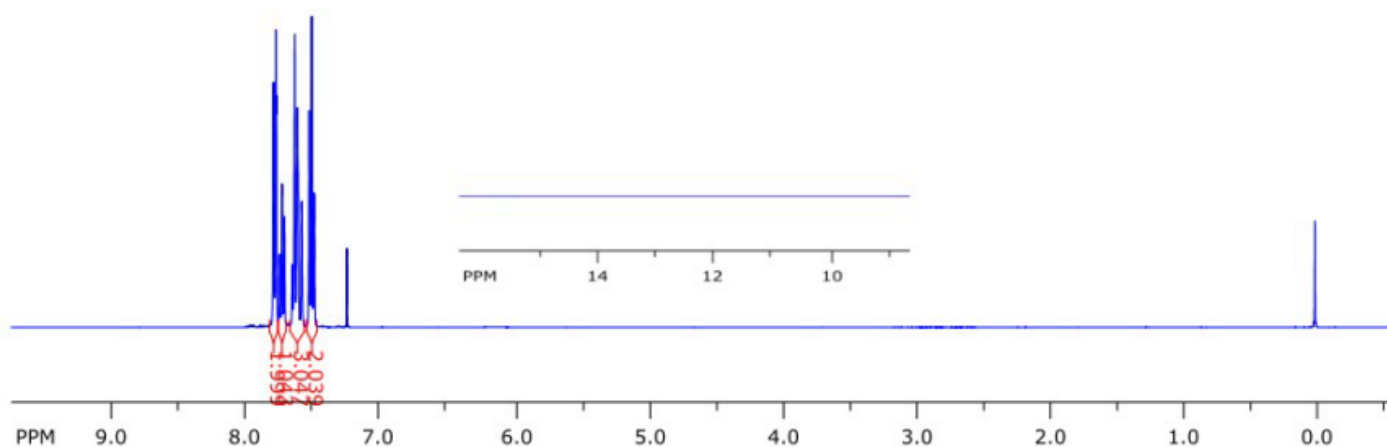

file: D:\NAPO\NMR\JELA\nmr\jn-218\1\fid expt: <zg30>  
transmitter freq.: 400.132471 MHz  
time domain size: 65536 points  
width: 8196.72 Hz = 20.4850 ppm = 0.125072 Hz/pt  
number of scans: 16

freq. of 0 ppm: 400.130009 MHz  
processed size: 65536 complex points  
LB: 0.300 GF: 0.0000  
Hz/cm: 166.111 ppm/cm: 0.41514

# Compound 3h

SpinWorks 4: SVS 218 13C CDCL3

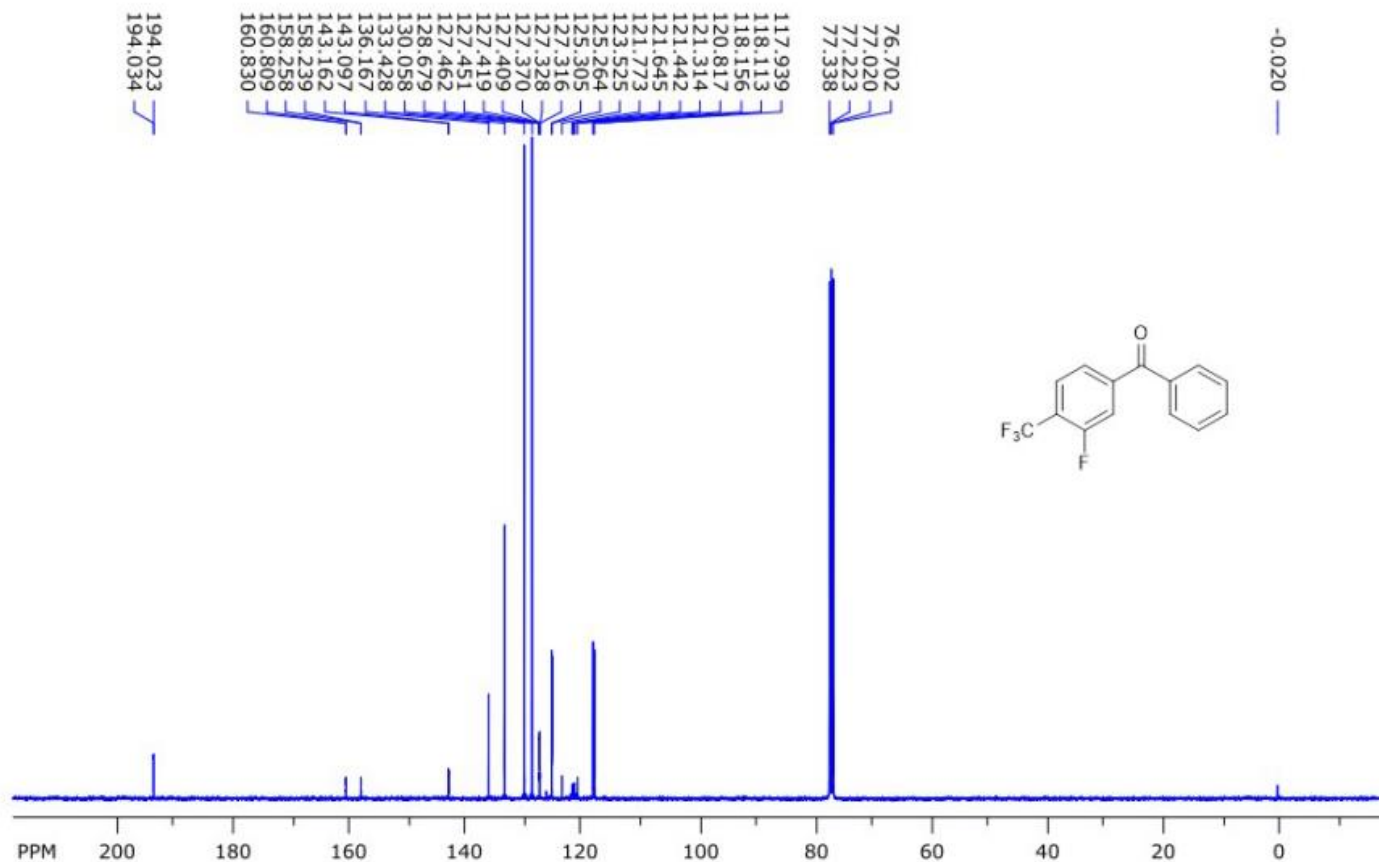

file: D:\NAPO\NMR\JELA\nmr\jn-218\2\fid expt: <zggp30>  
transmitter freq.: 100.622830 MHz  
time domain size: 65536 points  
width: 23809.52 Hz = 236.6215 ppm = 0.363305 Hz/pt  
number of scans: 3500

freq. of 0 ppm: 100.612767 MHz  
processed size: 32768 complex points  
LB: 1.000 GF: 0.0000  
Hz/cm: 952.381 ppm/cm: 9.46486

# Compound 3i

SpinWorks 4: IVA 1597 1H DMSO

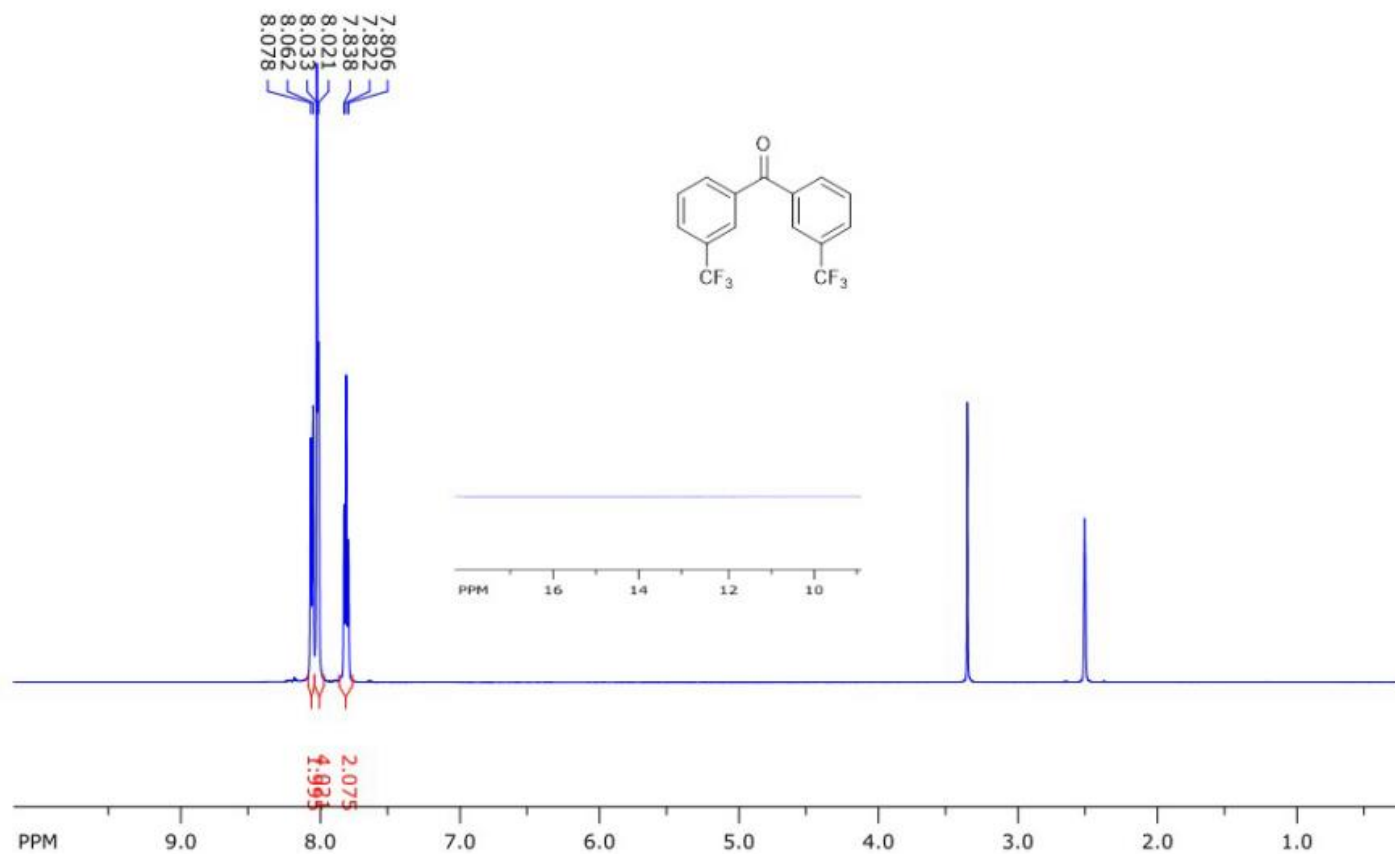

file: ...APO\NMR\500-2\mkr11207\23 1597\fid expt: <zg30>  
transmitter freq.: 500.133001 MHz  
time domain size: 65536 points  
width: 12335.53 Hz = 24.6645 ppm = 0.188225 Hz/pt  
number of scans: 24

freq. of 0 ppm: 500.130005 MHz  
processed size: 65536 complex points  
LB: 0.300 GF: 0.0000  
Hz/cm: 200.316 ppm/cm: 0.40053

# Compound 3i

SpinWorks 4: IVA 1597 13c DMSO

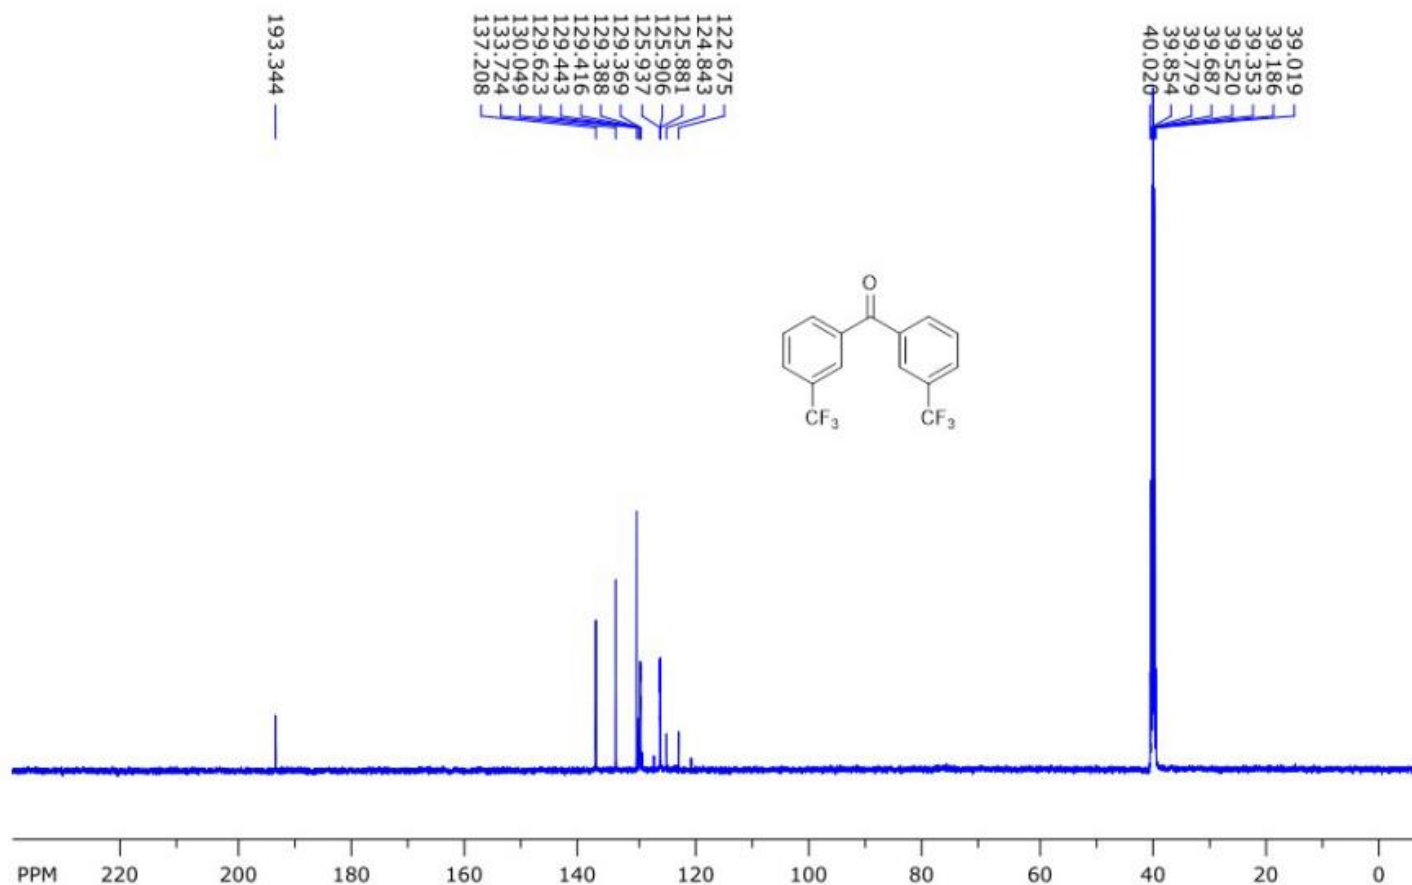

file: D:\NAPO\NMR\500-2\mkr11207\24\fid expt: <zgpg30>  
transmitter freq.: 125.772879 MHz  
time domain size: 65536 points  
width: 36057.69 Hz = 286.6889 ppm = 0.550197 Hz/pt  
number of scans: 512

freq. of 0 ppm: 125.757842 MHz  
processed size: 32768 complex points  
LB: 2.000 GF: 0.0000  
Hz/cm: 1239.683 ppm/cm: 9.85652

# Compound 3j

SpinWorks 4: SVS 226 1H CDCl3

7.367  
7.372  
7.378  
7.384  
7.426  
7.431  
7.444  
7.448  
7.454  
7.458  
7.463  
7.736  
7.741  
7.753  
7.758

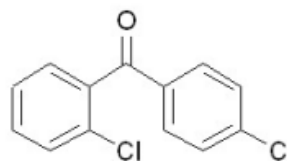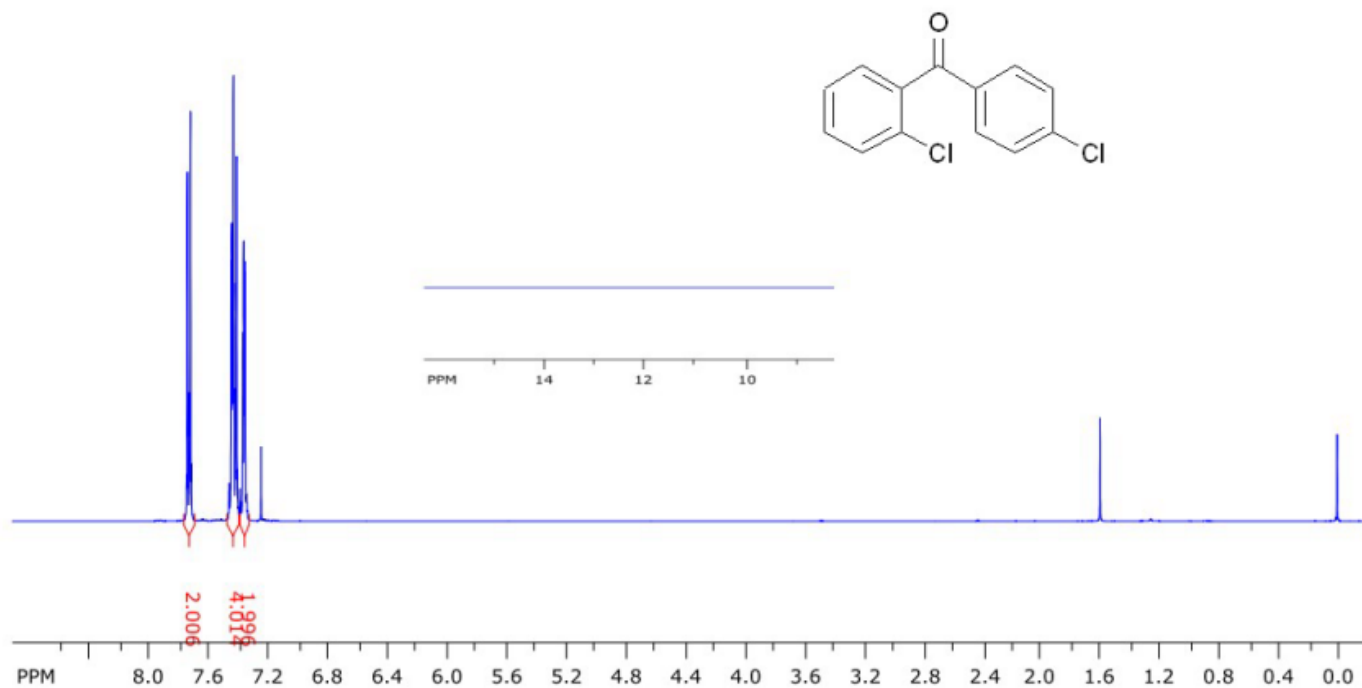

file: D:\NAPO\NMR\JELA\nmr\jn-226\1\fid expt: <zg30>  
transmitter freq.: 400.132471 MHz  
time domain size: 65536 points  
width: 8196.72 Hz = 20.4850 ppm = 0.125072 Hz/pt  
number of scans: 16

freq. of 0 ppm: 400.130009 MHz  
processed size: 65536 complex points  
LB: 0.300 GF: 0.0000  
Hz/cm: 146.163 ppm/cm: 0.36529

# Compound 3j

SpinWorks 4: SVS 226 13C CDCl3

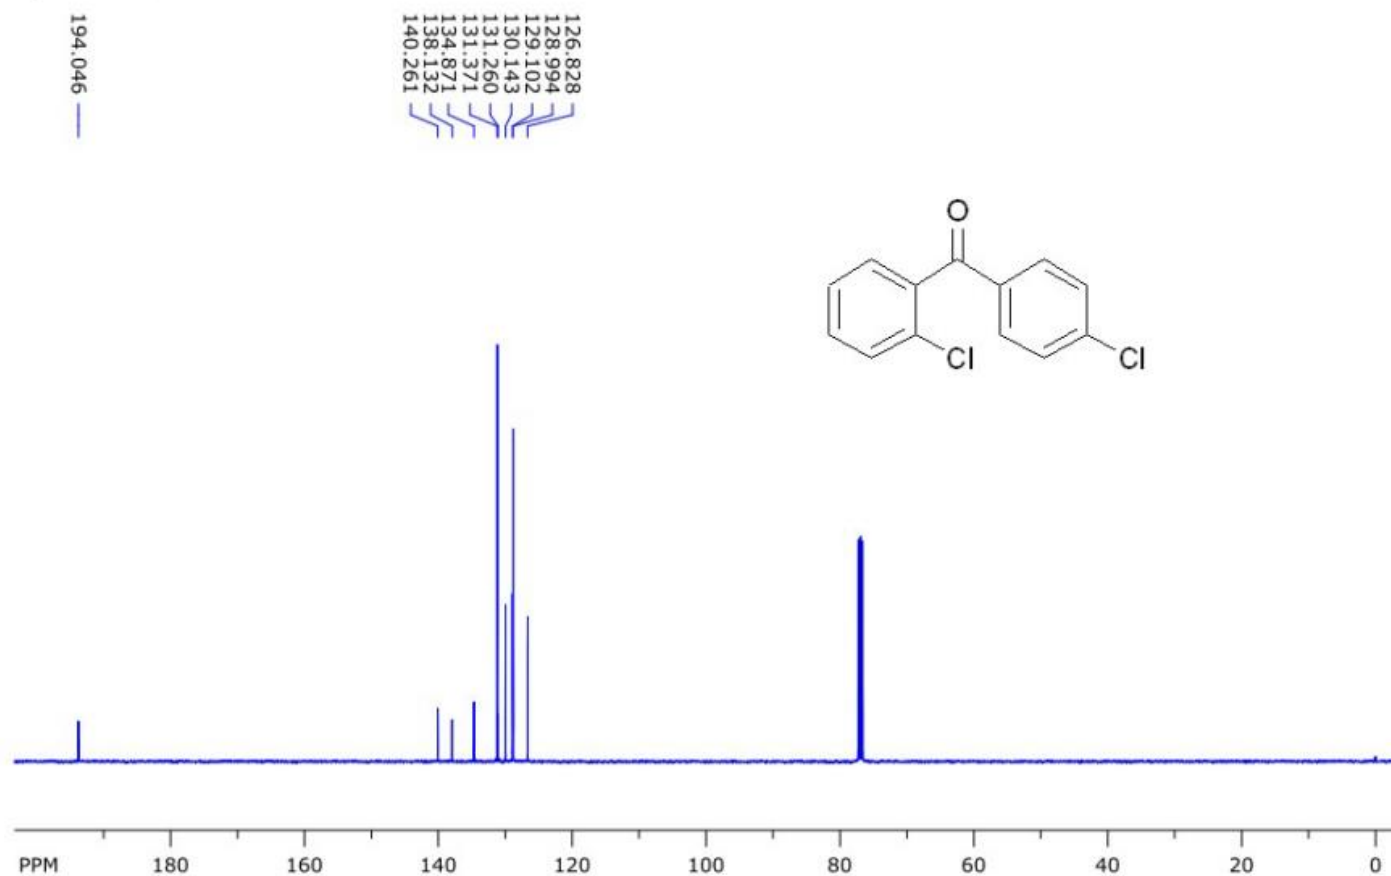

file: D:\NAPO\NMR\JELA\nmr\jn-226\2\fid expt: <zpgp30>  
transmitter freq.: 100.622830 MHz  
time domain size: 65536 points  
width: 23809.52 Hz = 236.6215 ppm = 0.363305 Hz/pt  
number of scans: 2000

freq. of 0 ppm: 100.612770 MHz  
processed size: 32768 complex points  
LB: 1.000 GF: 0.0000  
Hz/cm: 836.494 ppm/cm: 8.31316



# Compound 3k

SpinWorks 4: IVAB 3684 1H CDCl3

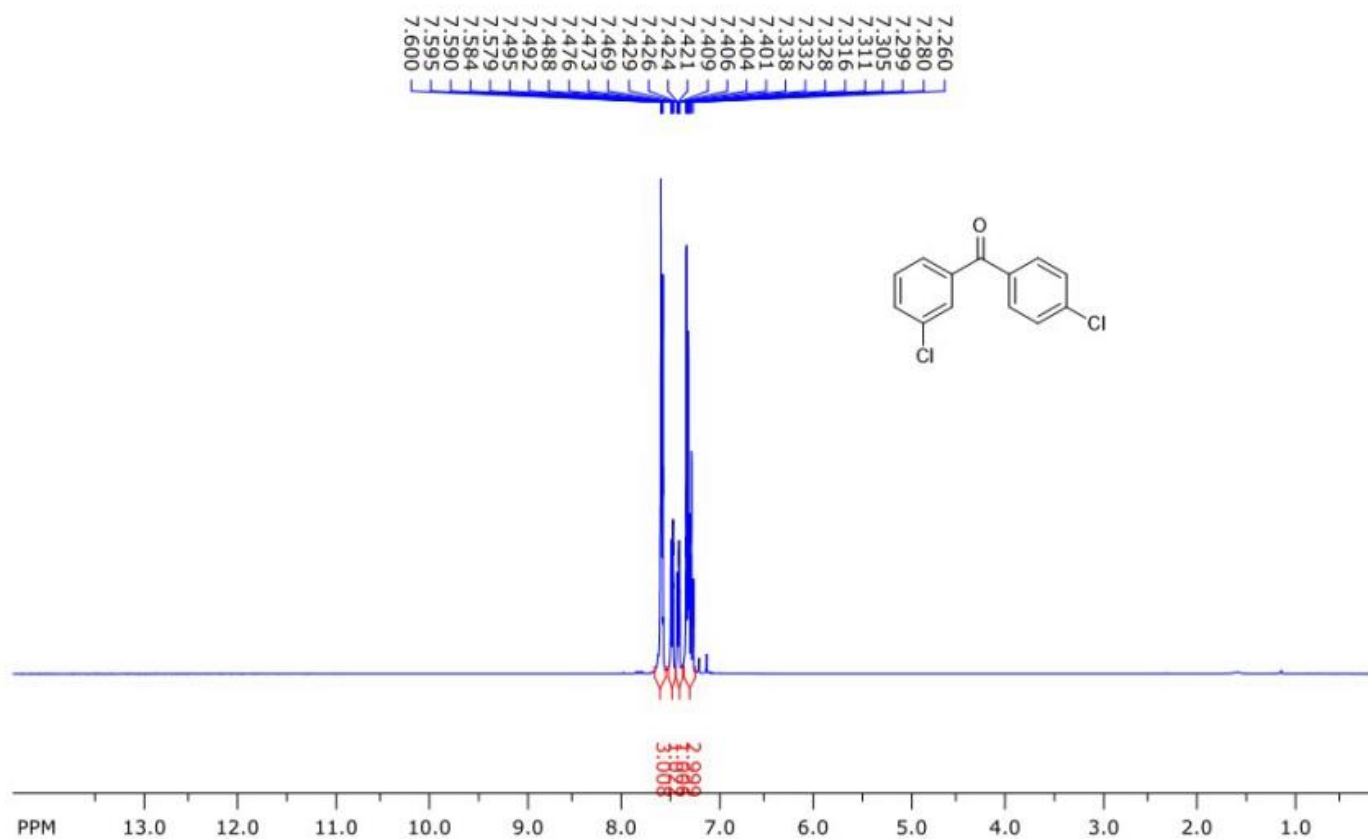

file: ...tones\Fids part 1\Ivab-3684\19\fid expt: <zg30>  
transmitter freq.: 400.133001 MHz  
time domain size: 65536 points  
width: 6393.86 Hz = 15.9793 ppm = 0.097563 Hz/pt  
number of scans: 64

freq. of 0 ppm: 400.130066 MHz  
processed size: 65536 complex points  
LB: 0.300 GF: 0.0000  
Hz/cm: 228.590 ppm/cm: 0.57129

# Compound 3k

SpinWorks 4: IVAB 3684 13C DMSO

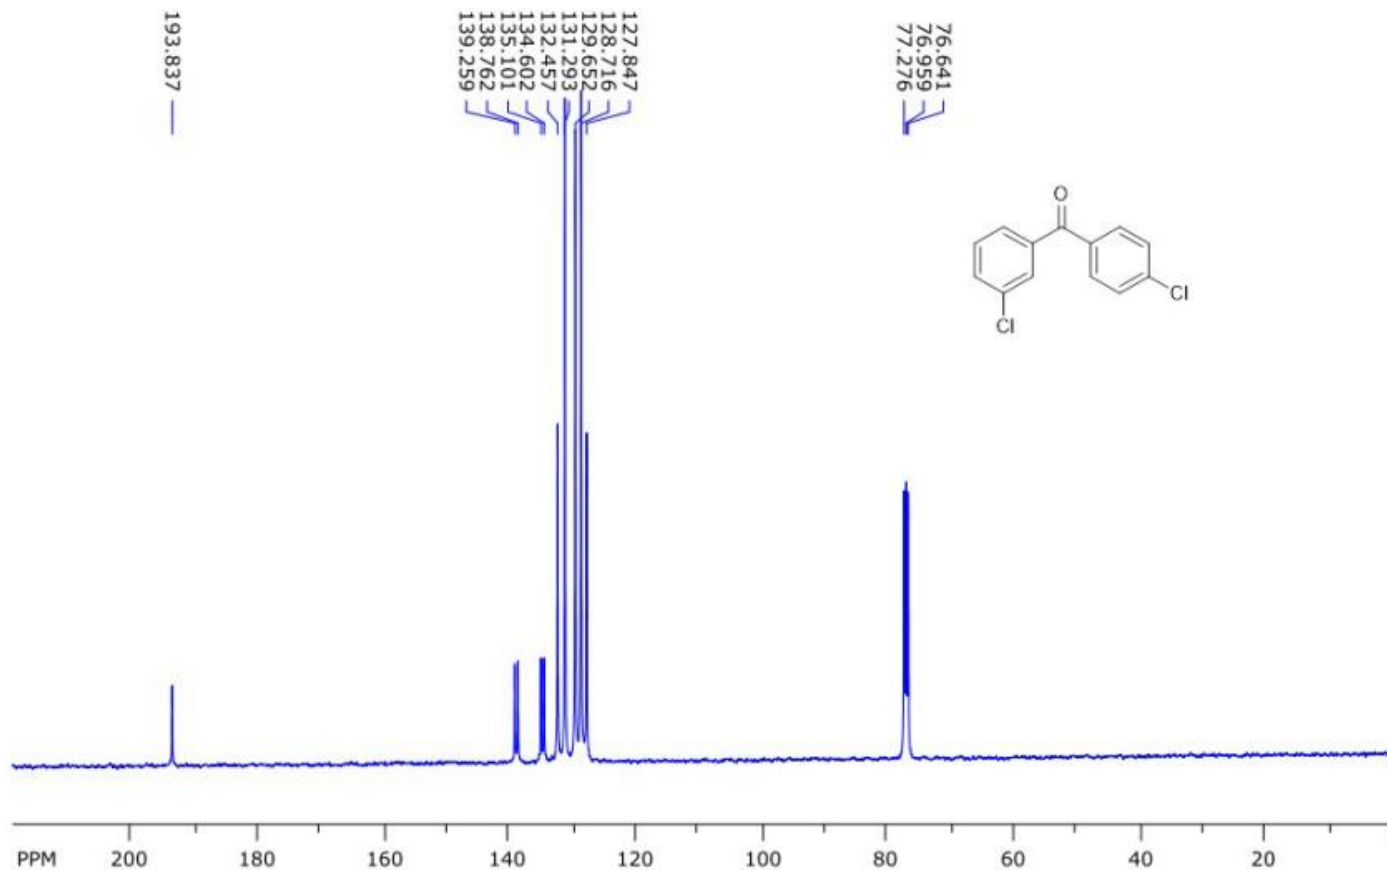

file: ...tones\Fids part 1\Ivab-3684\20\fid expt: <zgpg30>  
transmitter freq.: 100.623836 MHz  
time domain size: 65536 points  
width: 24038.46 Hz = 238.8943 ppm = 0.366798 Hz/pt  
number of scans: 1335

freq. of 0 ppm: 100.612780 MHz  
processed size: 32768 complex points  
LB: 10.000 GF: 0.0000  
Hz/cm: 887.352 ppm/cm: 8.81850

# Compound 3I

SpinWorks 4: IVAB 3680 1H CDCl3

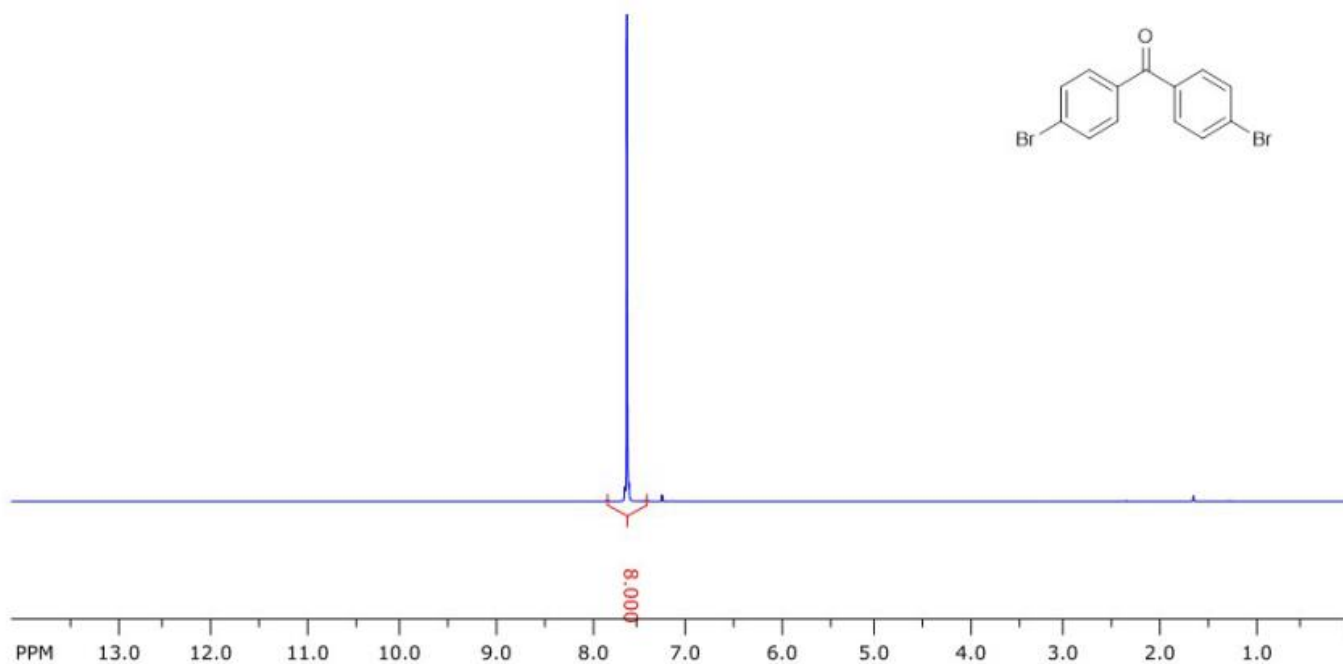

file: ...tones\Fids part 1\Ivab-3680\15\fid expt: <zg30>  
transmitter freq.: 400.133001 MHz  
time domain size: 65536 points  
width: 6393.86 Hz = 15.9793 ppm = 0.097563 Hz/pt  
number of scans: 64

freq. of 0 ppm: 400.130013 MHz  
processed size: 65536 complex points  
LB: 0.300 GF: 0.0000  
Hz/cm: 227.565 ppm/cm: 0.56872

# Compound 3I

SpinWorks 4: IVAB 3680 13C CDCL3

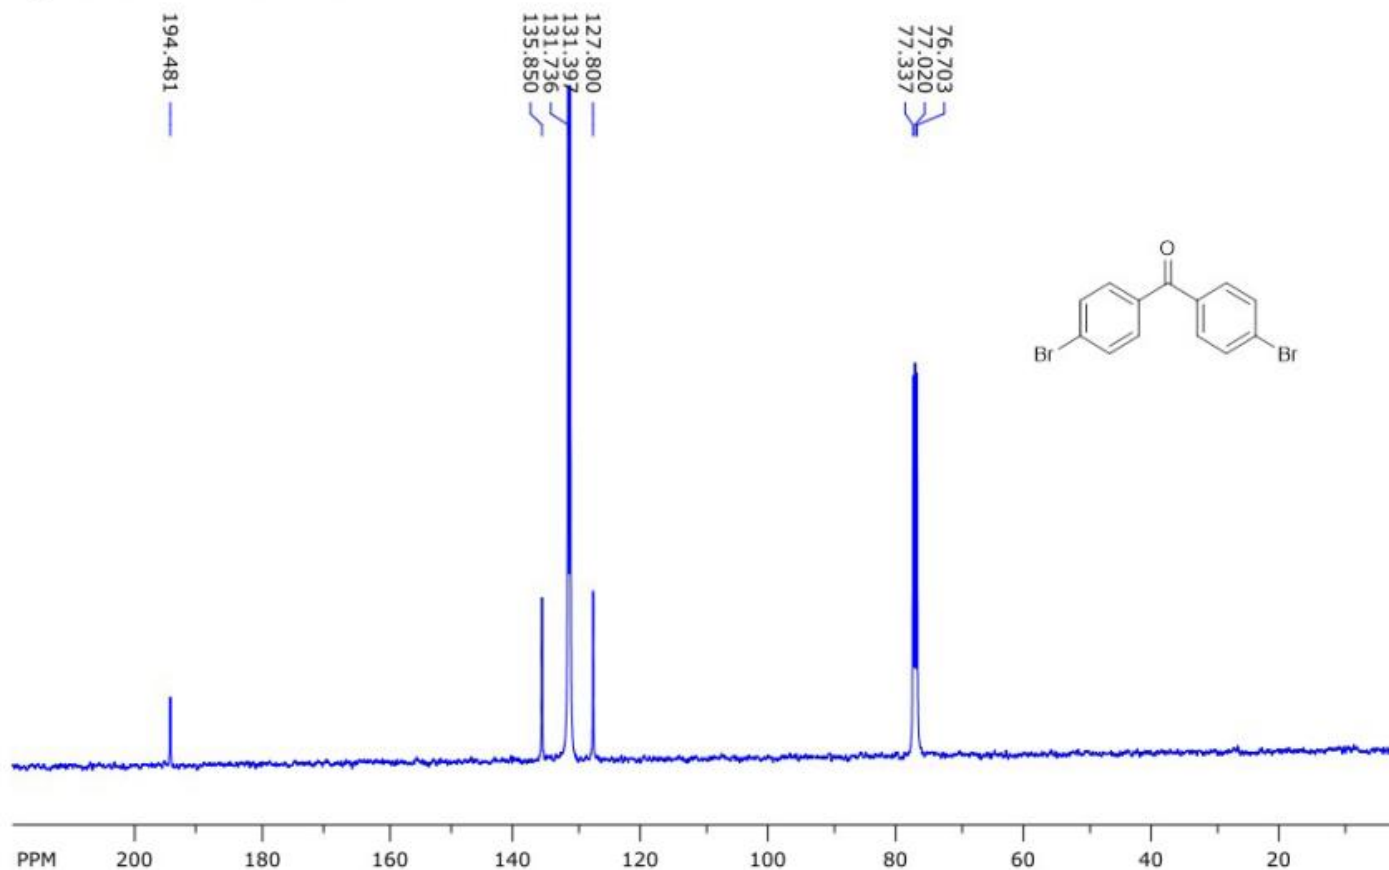

file: ...tones\Fids part 1\Ivab-3680\16\fid expt: <zpgg30>  
transmitter freq.: 100.623836 MHz  
time domain size: 65536 points  
width: 24038.46 Hz = 238.8943 ppm = 0.366798 Hz/pt  
number of scans: 768

freq. of 0 ppm: 100.612771 MHz  
processed size: 32768 complex points  
LB: 10.000 GF: 0.0000  
Hz/cm: 877.717 ppm/cm: 8.72275

# Compound 3m

SpinWorks 4: IVAB 3677 1H CDCL3

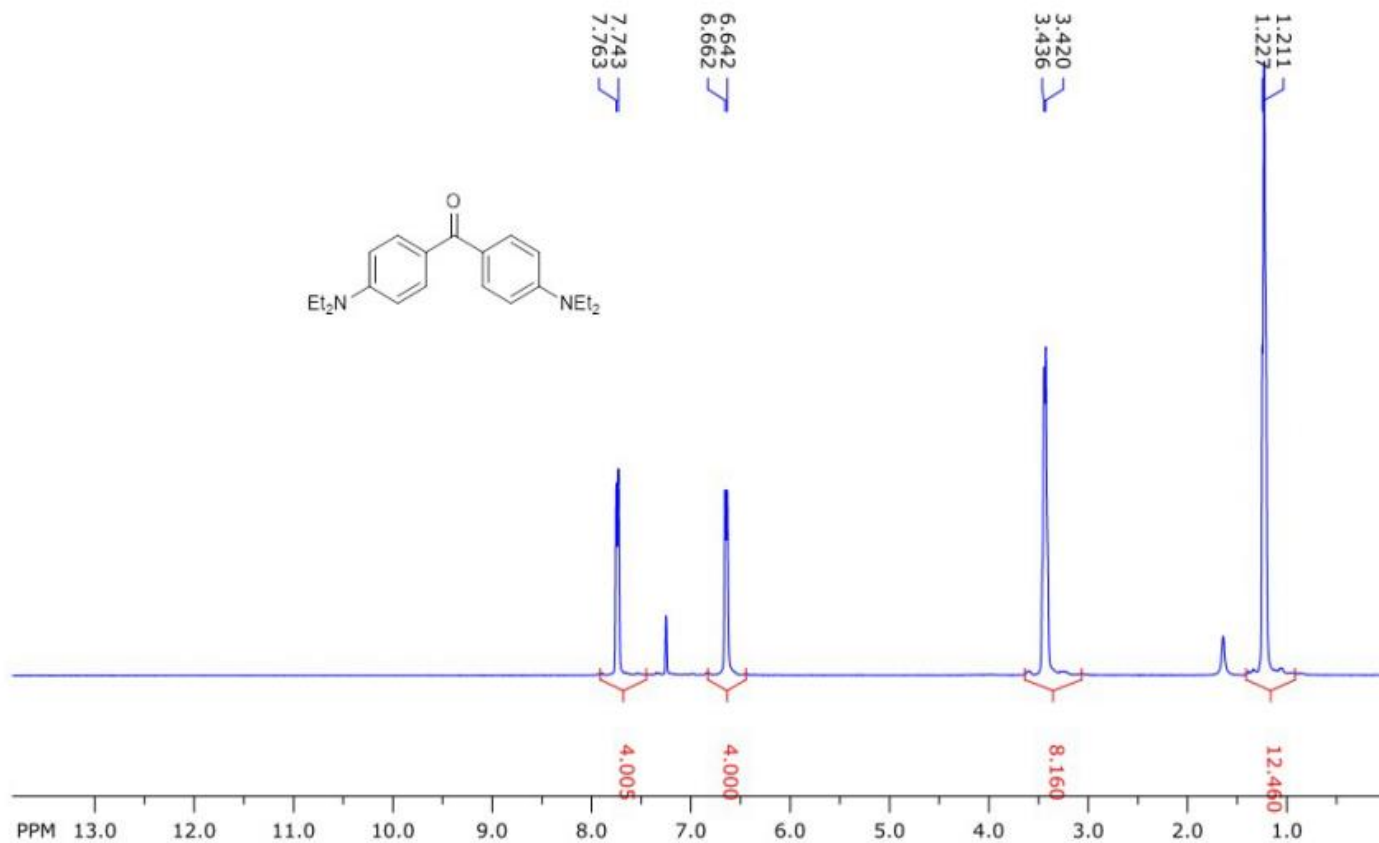

file: ...tones\Fids part 1\Ivab-3677\13\fid exp: <zg30>  
transmitter freq.: 400.133001 MHz  
time domain size: 65536 points  
width: 6393.86 Hz = 15.9793 ppm = 0.097563 Hz/pt  
number of scans: 64

freq. of 0 ppm: 400.130012 MHz  
processed size: 65536 complex points  
LB: 0.300 GF: 0.0000  
Hz/cm: 222.440 ppm/cm: 0.55591

# Compound 3m

SpinWorks 4: IVAB 3677 13C CDCl3

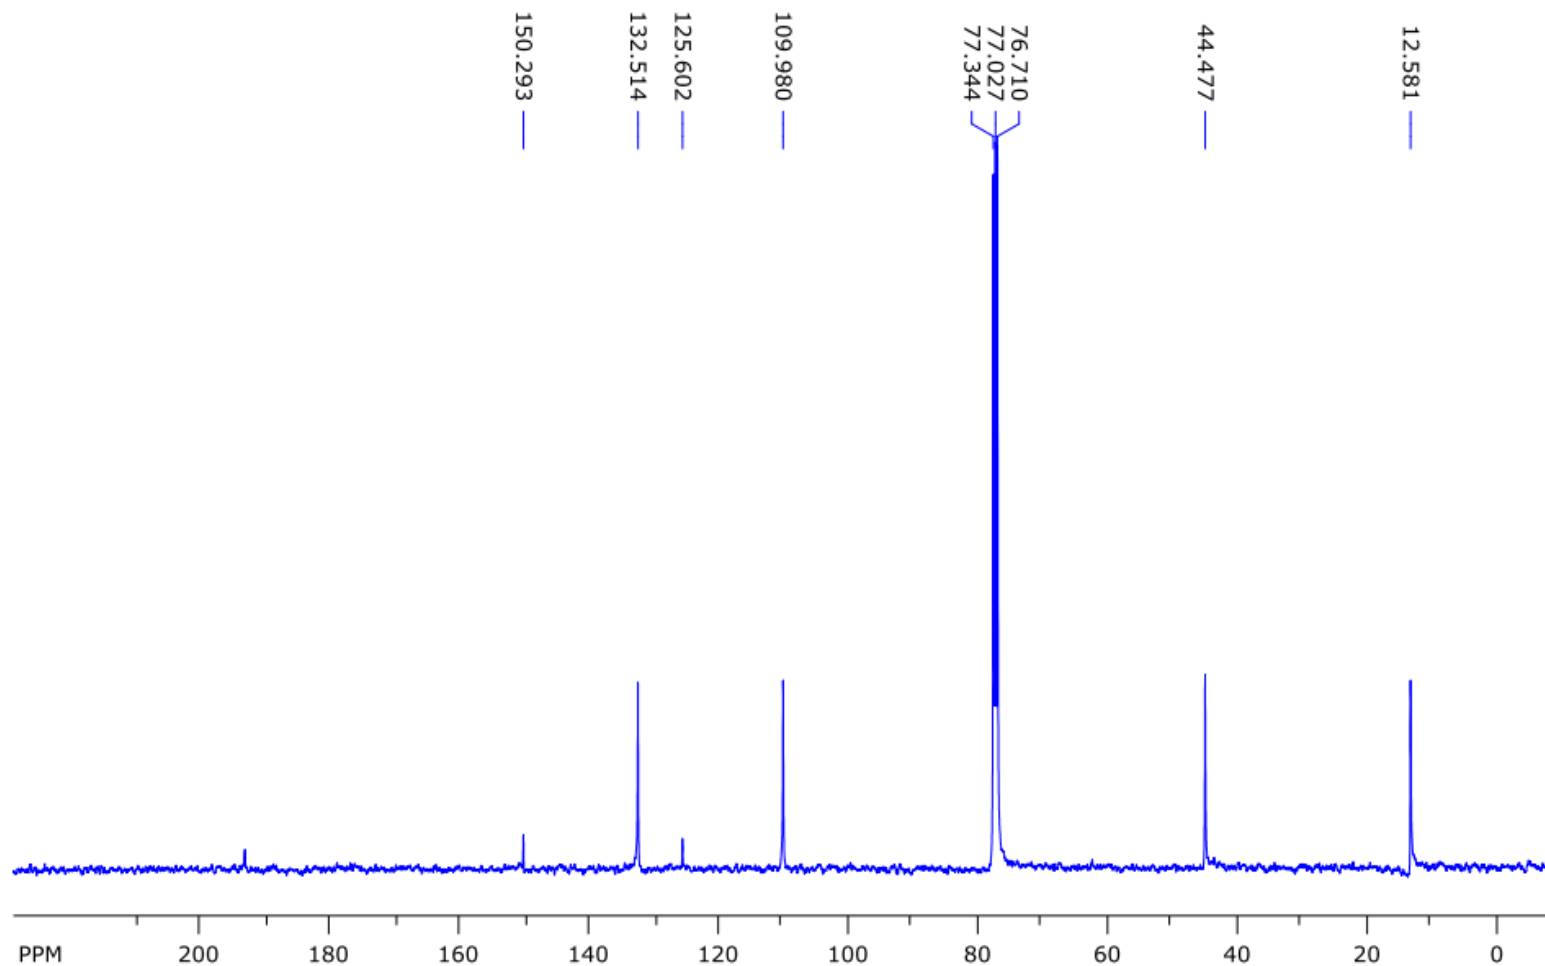

file: ...tones\Fids part 1\Ivab-3677\14\fid expt: <zgpg30>  
transmitter freq.: 100.623836 MHz  
time domain size: 65536 points  
width: 24038.46 Hz = 238.8943 ppm = 0.366798 Hz/pt  
number of scans: 1636

freq. of 0 ppm: 100.612769 MHz  
processed size: 32768 complex points  
LB: 10.000 GF: 0.0000  
Hz/cm: 961.538 ppm/cm: 9.55577

# Compound 3n

SpinWorks 4: IVAB 3647 1H CDCl3

7.455  
7.473  
7.492  
7.557  
7.575  
7.749  
7.762  
7.789  
6.946

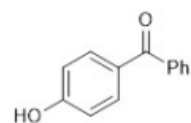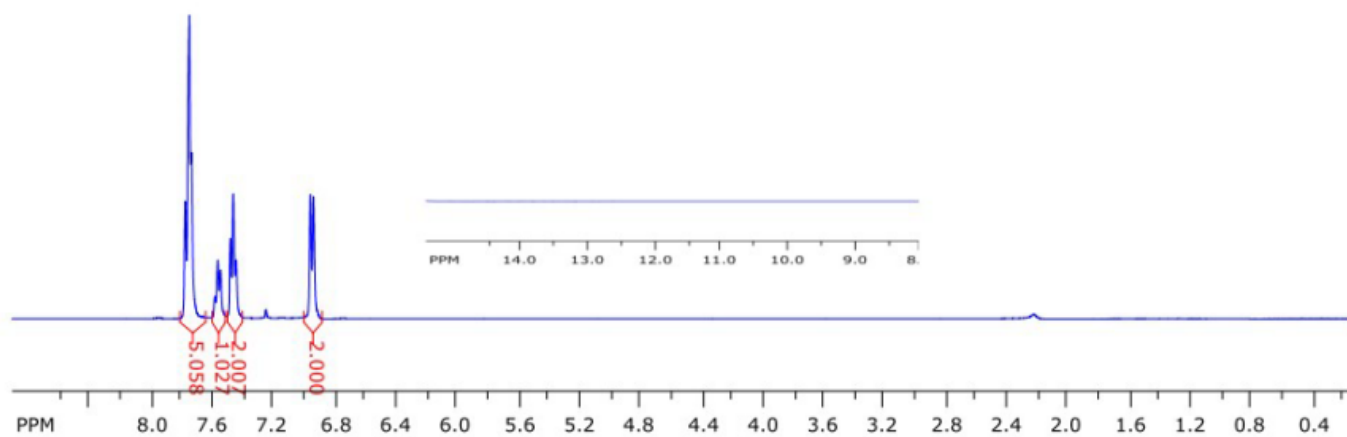

file: ...chael Slovakia\NMR\Ivab-3647\5\fid expt: <zg30>  
transmitter freq.: 400.133001 MHz  
time domain size: 65536 points  
width: 6393.86 Hz = 15.9793 ppm = 0.097563 Hz/pt  
number of scans: 64

freq. of 0 ppm: 400.130009 MHz  
processed size: 65536 complex points  
LB: 0.300 GF: 0.0000  
Hz/cm: 141.457 ppm/cm: 0.35353

# Compound 3n

SpinWorks 4: IVAB 3647 13C CDCI3

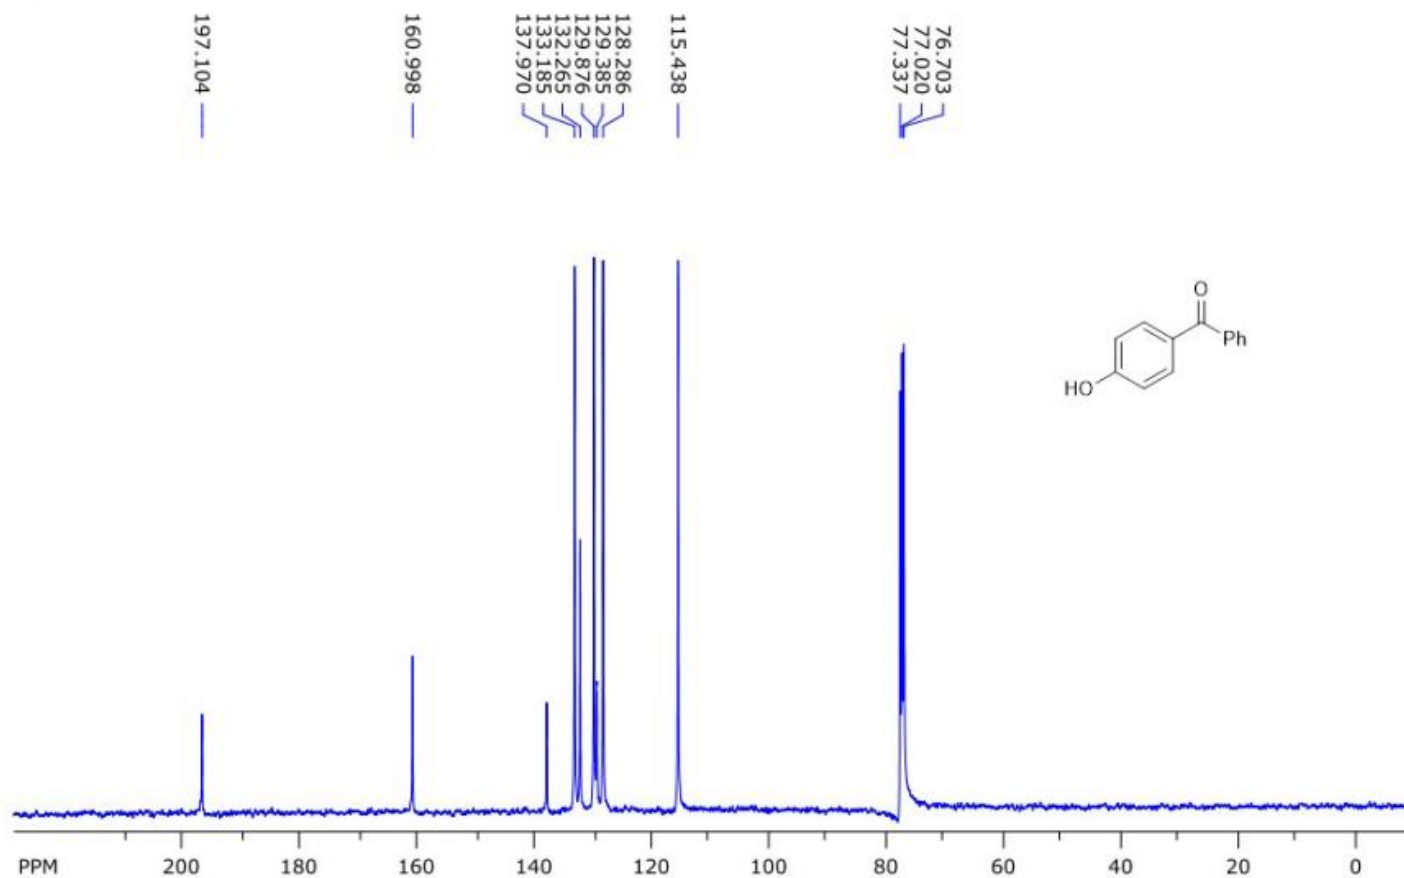

file: ...chael Slovakia\NMR\Ivab-3647\6\fid expt: <zpgg30>  
transmitter freq.: 100.623836 MHz  
time domain size: 65536 points  
width: 24038.46 Hz = 238.8943 ppm = 0.366798 Hz/pt

freq. of 0 ppm: 100.612771 MHz  
processed size: 32768 complex points  
LB: 10.000 GF: 0.0000  
Hz/cm: 961.538 ppm/cm: 9.55577



# Compound 3o

SpinWorks 4: IVA 3637 1H DMSO

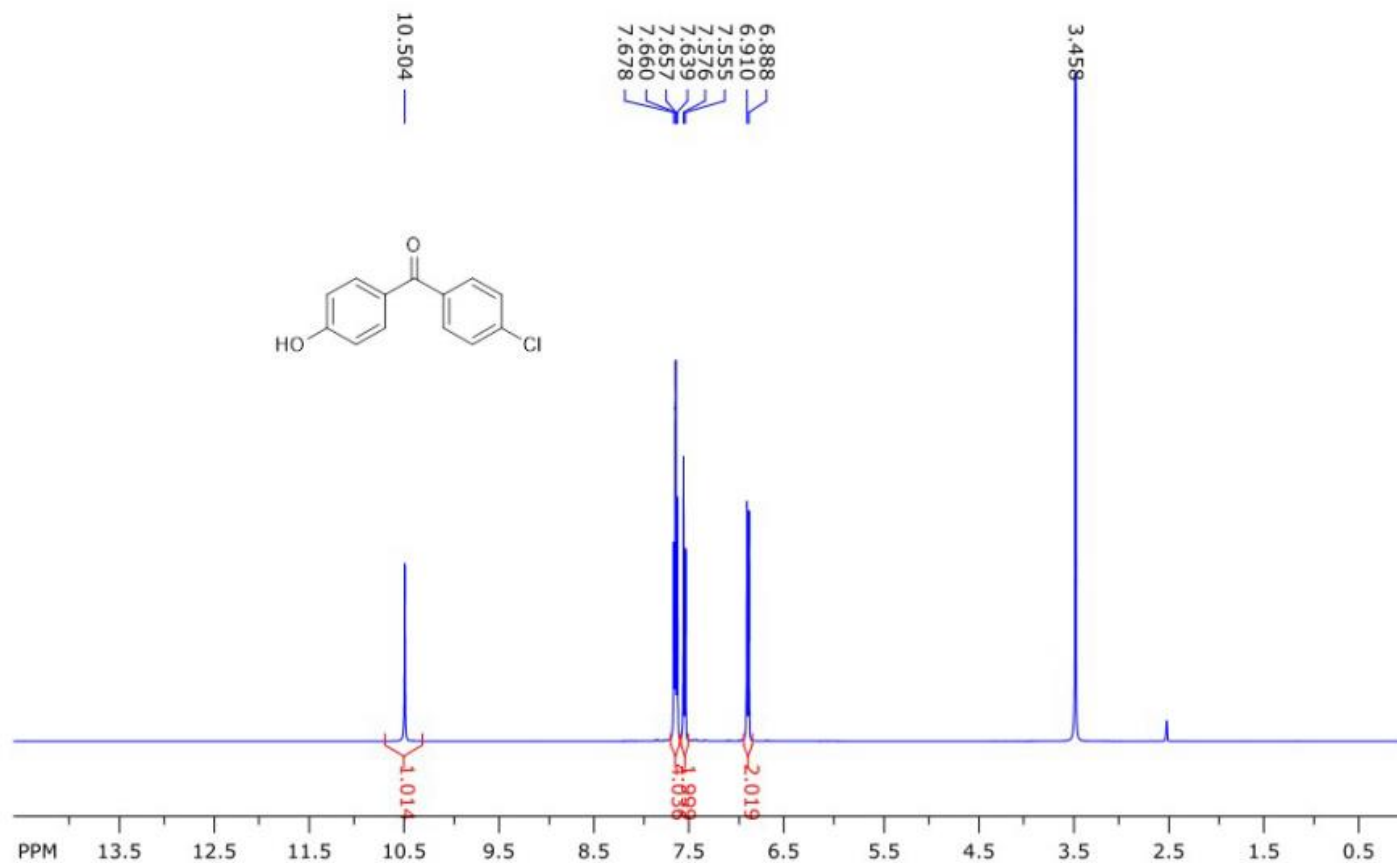

file: ...chael Slovakia\NMR\Ivab-3637\1\fid expt: <zg30>  
transmitter freq.: 400.133001 MHz  
time domain size: 65536 points  
width: 6393.86 Hz = 15.9793 ppm = 0.097563 Hz/pt  
number of scans: 64

freq. of 0 ppm: 400.130003 MHz  
processed size: 65536 complex points  
LB: 0.300 GF: 0.0000  
Hz/cm: 233.687 ppm/cm: 0.58402

# Compound 3o

SpinWorks 4: IVAB 3637 13C DMSO

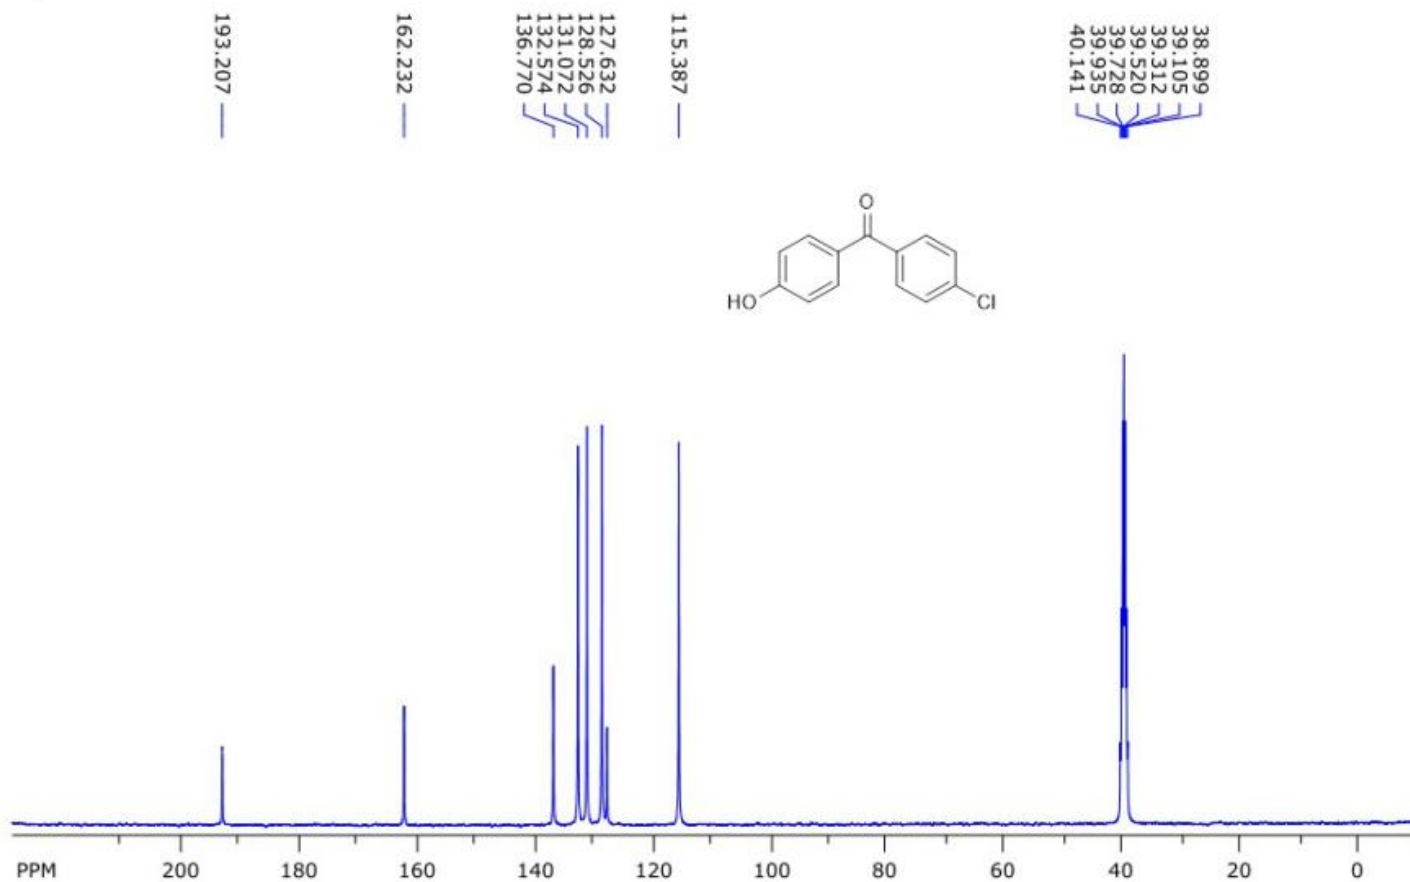

file: ...chael Slovakia\NMR\Ivab-3637\2\fid expt: <zpgp30>  
transmitter freq.: 100.623836 MHz  
time domain size: 65536 points  
width: 24038.46 Hz = 238.8943 ppm = 0.366798 Hz/pt  
number of scans: 1291

freq. of 0 ppm: 100.612808 MHz  
processed size: 32768 complex points  
LB: 10.000 GF: 0.0000  
Hz/cm: 961.538 ppm/cm: 9.55577

# Compound 3p

SpinWorks 4: IVAB 3675 1H DMSO

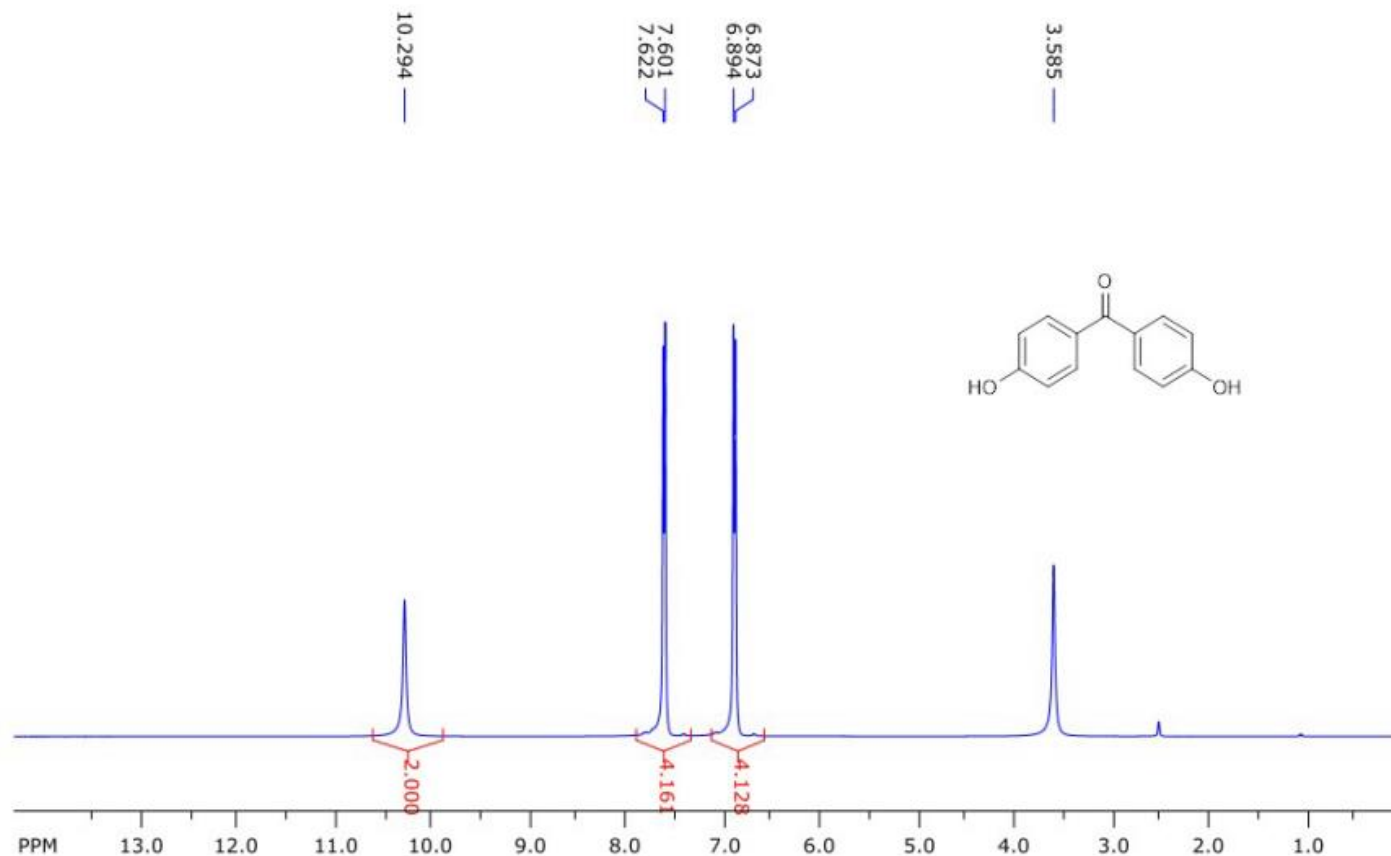

file: ...NMR\Ivab-3675\1H\_DMSO\_notCDCl3\fid expt: <zg30>  
transmitter freq.: 400.133001 MHz  
time domain size: 65536 points  
width: 6393.86 Hz = 15.9793 ppm = 0.097563 Hz/pt  
number of scans: 64

freq. of 0 ppm: 400.130003 MHz  
processed size: 65536 complex points  
LB: 0.300 GF: 0.0000  
Hz/cm: 228.878 ppm/cm: 0.57200

# Compound 3p

SpinWorks 4: IVAB 3675 13C DMSO

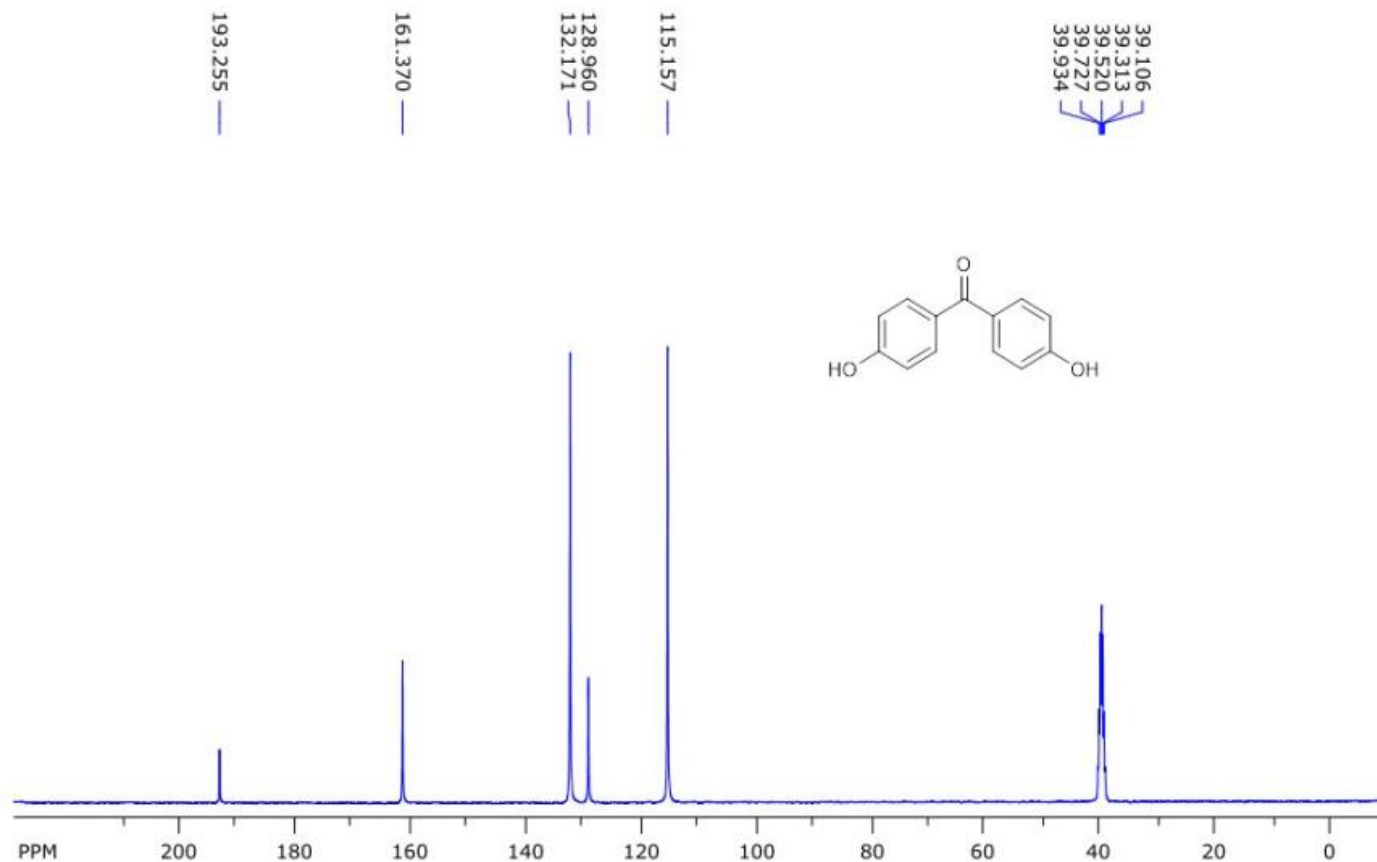

file: ...lovakia\NMR\Ivab-3675\13C\_DMSO\fid expt: <zgpg30>  
transmitter freq.: 100.623836 MHz  
time domain size: 65536 points  
width: 24038.46 Hz = 238.8943 ppm = 0.366798 Hz/pt  
number of scans: 625

freq. of 0 ppm: 100.612801 MHz  
processed size: 32768 complex points  
LB: 10.000 GF: 0.0000  
Hz/cm: 961.538 ppm/cm: 9.55577

# Compound 3q

SpinWorks 4: SVS 396 1H CDCl3

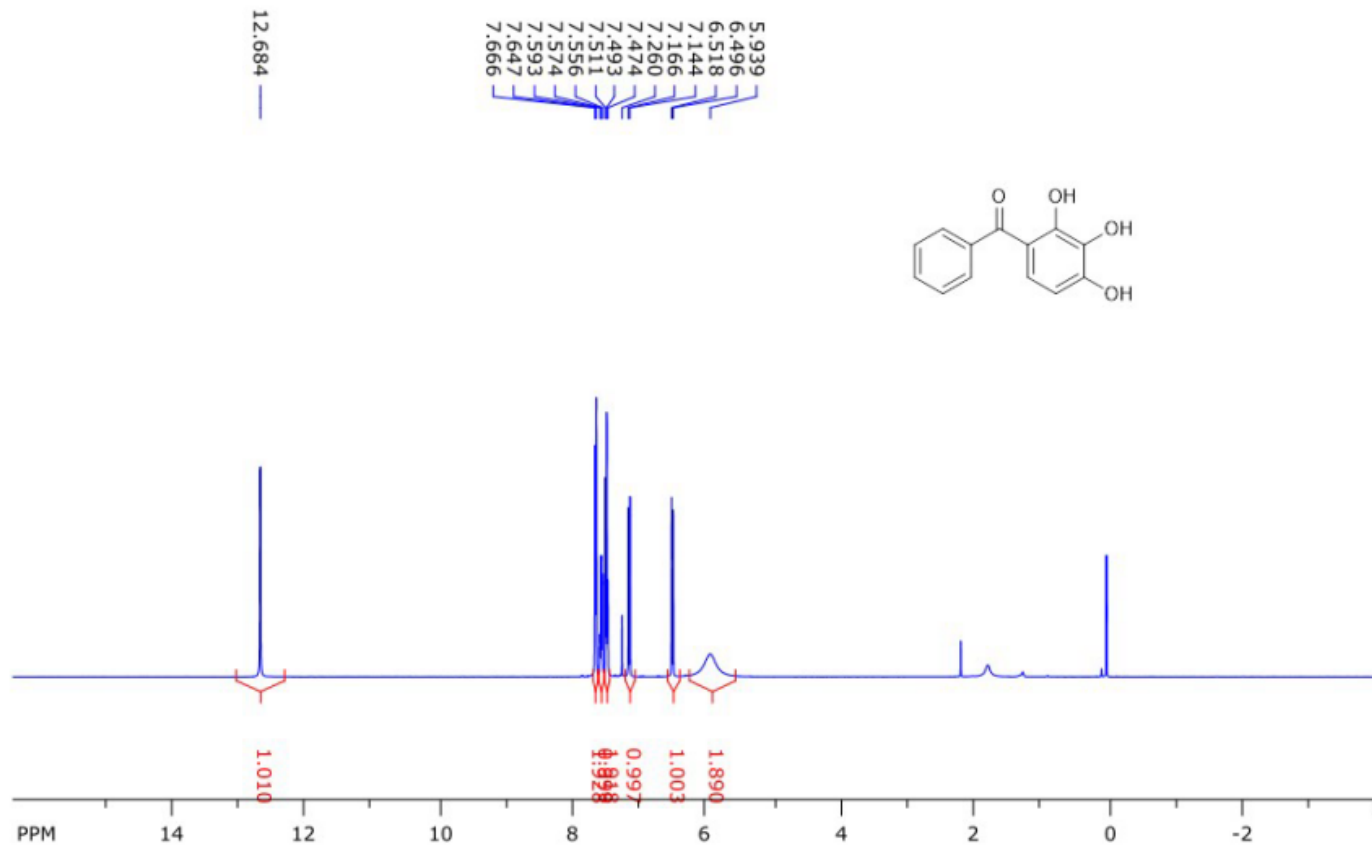

file: ...NAPO\NMR\JELA\nmr\jn-SVS-396\1\fid expt: <zg30>  
transmitter freq.: 400.132471 MHz  
time domain size: 65536 points  
width: 8196.72 Hz = 20.4850 ppm = 0.125072 Hz/pt  
number of scans: 16

freq. of 0 ppm: 400.130009 MHz  
processed size: 65536 complex points  
LB: 0.300 GF: 0.0000  
Hz/cm: 327.869 ppm/cm: 0.81940

# Compound 3q

SpinWorks 4: SVS 396 13C CDCl3

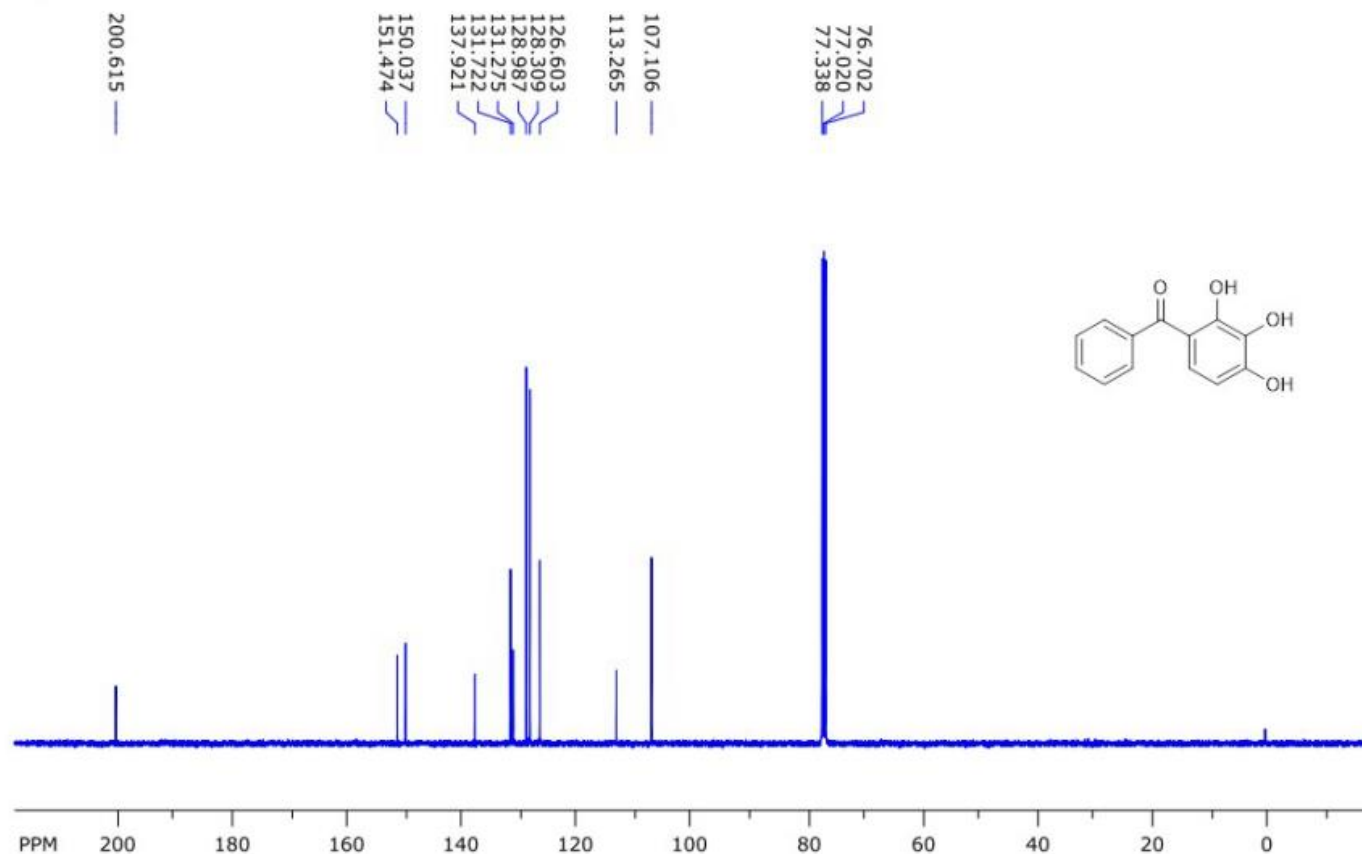

file: ...NAPO\NMR\JELA\nmr\jn-SVS-396\2\fid expt: <zgpg30>  
transmitter freq.: 100.622830 MHz  
time domain size: 65536 points  
width: 23809.52 Hz = 236.6215 ppm = 0.363305 Hz/pt  
number of scans: 1024

freq. of 0 ppm: 100.612768 MHz  
processed size: 32768 complex points  
LB: 1.000 GF: 0.0000  
Hz/cm: 952.381 ppm/cm: 9.46486

# Compound 3r

SpinWorks 4: SVS 400 1H CDCl3

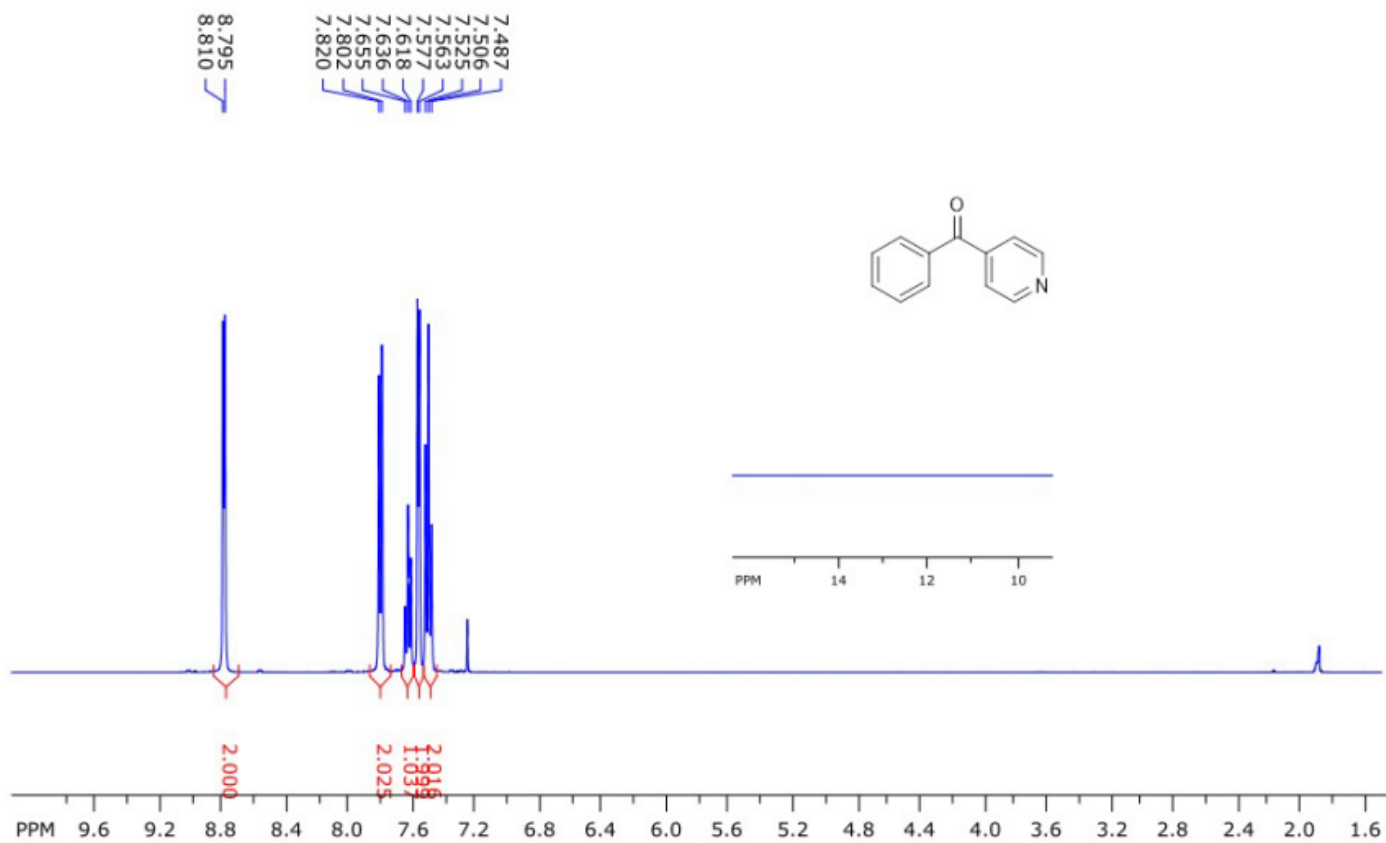

file: ...NAPO\NMR\JELA\nmr\jn-SVS-400\1\fid exp: <zg30>  
transmitter freq.: 400.132471 MHz  
time domain size: 65536 points  
width: 8196.72 Hz = 20.4850 ppm = 0.125072 Hz/pt  
number of scans: 16

freq. of 0 ppm: 400.130009 MHz  
processed size: 65536 complex points  
LB: 0.300 GF: 0.0000  
Hz/cm: 138.944 ppm/cm: 0.34724

# Compound 3r

SpinWorks 4: SVS 400 13C CDCL3

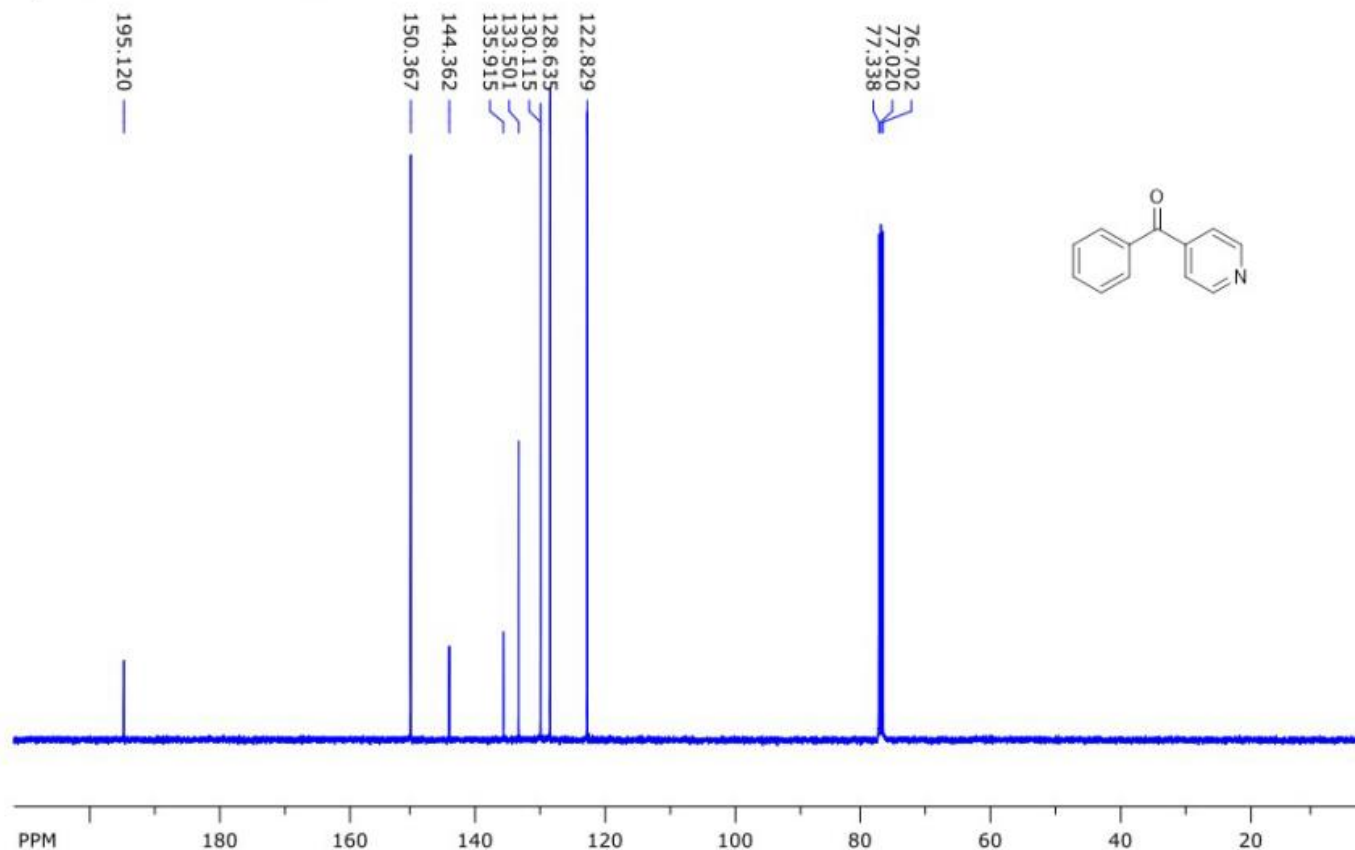

file: ...NAPO\NMR\JELA\nmr\jn-SVS-400\2\fid exp: <zpgg30>  
transmitter freq.: 100.622830 MHz  
time domain size: 65536 points  
width: 23809.52 Hz = 236.6215 ppm = 0.363305 Hz/pt  
number of scans: 1024

freq. of 0 ppm: 100.612770 MHz  
processed size: 32768 complex points  
LB: 1.000 GF: 0.0000  
Hz/cm: 848.083 ppm/cm: 8.42833



# Compound 3s

SpinWorks 4: IVAB 3672 1h CDCL3

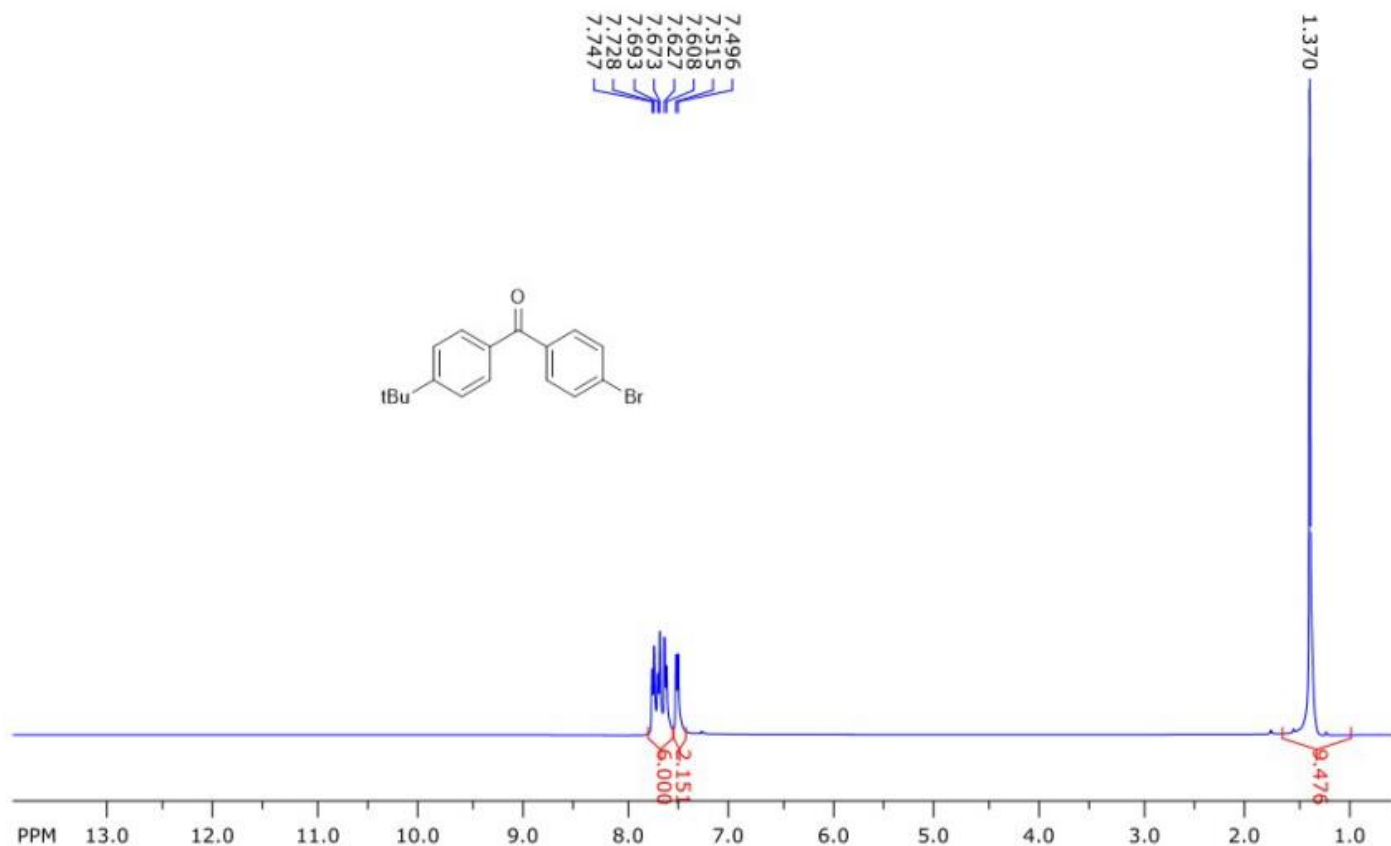

file: ...etones\Fids part 1\Ivab-3672\7\fid expt: <zg30>  
transmitter freq.: 400.133001 MHz  
time domain size: 65536 points  
width: 6393.86 Hz = 15.9793 ppm = 0.097563 Hz/pt  
number of scans: 64

freq. of 0 ppm: 400.130010 MHz  
processed size: 65536 complex points  
LB: 0.300 GF: 0.0000  
Hz/cm: 214.470 ppm/cm: 0.53600

# Compound 3s

SpinWorks 4: IVAB 3672 13C CDCl3

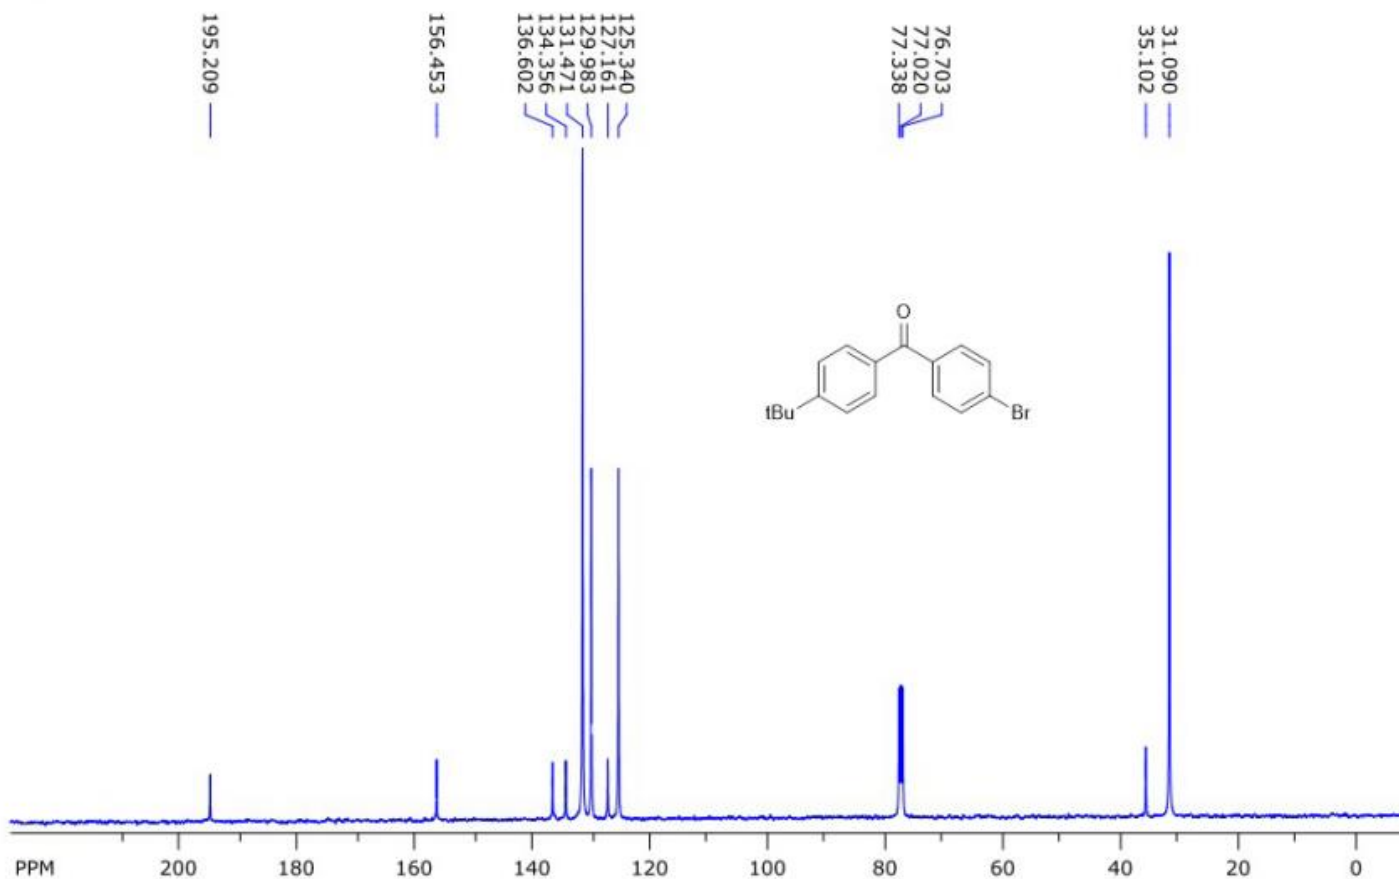

file: ...etones\Fids part 1\Ivab-3672\8\fid expt: <zggp30>  
transmitter freq.: 100.623836 MHz  
time domain size: 65536 points  
width: 24038.46 Hz = 238.8943 ppm = 0.366798 Hz/pt  
number of scans: 512

freq. of 0 ppm: 100.612774 MHz  
processed size: 32768 complex points  
LB: 10.000 GF: 0.0000  
Hz/cm: 961.538 ppm/cm: 9.55577

# Compound 3t

SpinWorks 4: IVA 2207 1H CDCl3

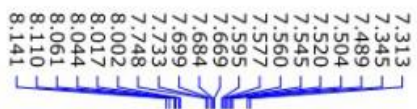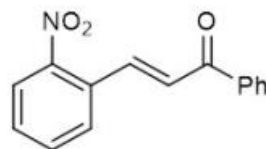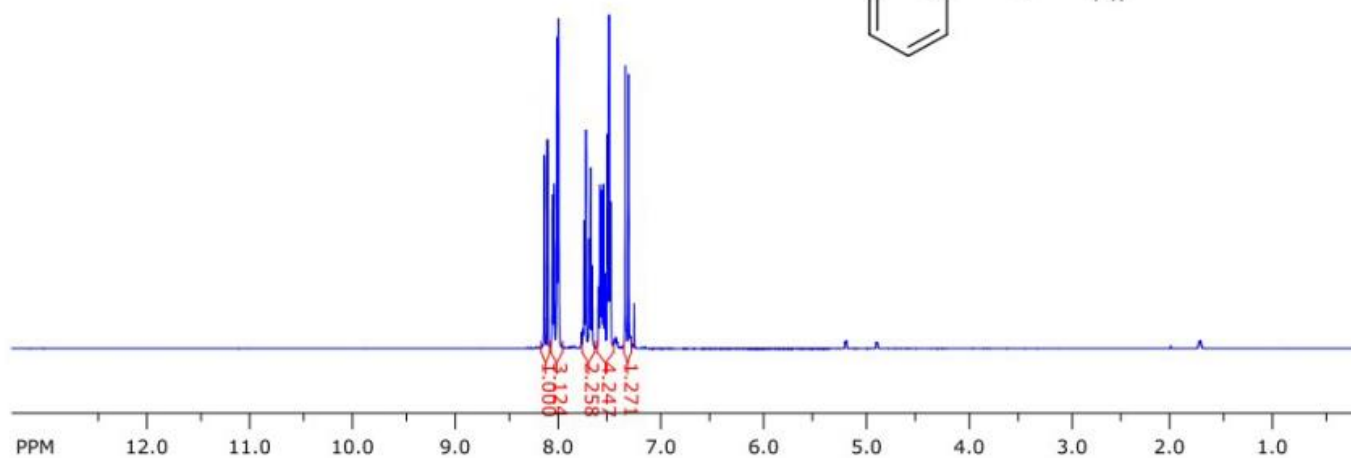

file: ...etones\Fids part 1\IVA 2207\27\fid expt: <zg30>  
transmitter freq.: 500.133001 MHz  
time domain size: 65536 points  
width: 12335.53 Hz = 24.6645 ppm = 0.188225 Hz/pt  
number of scans: 24

freq. of 0 ppm: 500.130023 MHz  
processed size: 65536 complex points  
LB: 0.300 GF: 0.0000  
Hz/cm: 264.509 ppm/cm: 0.52888

# Compound 3t

SpinWorks 4: IVA 2207 13C CDCl3

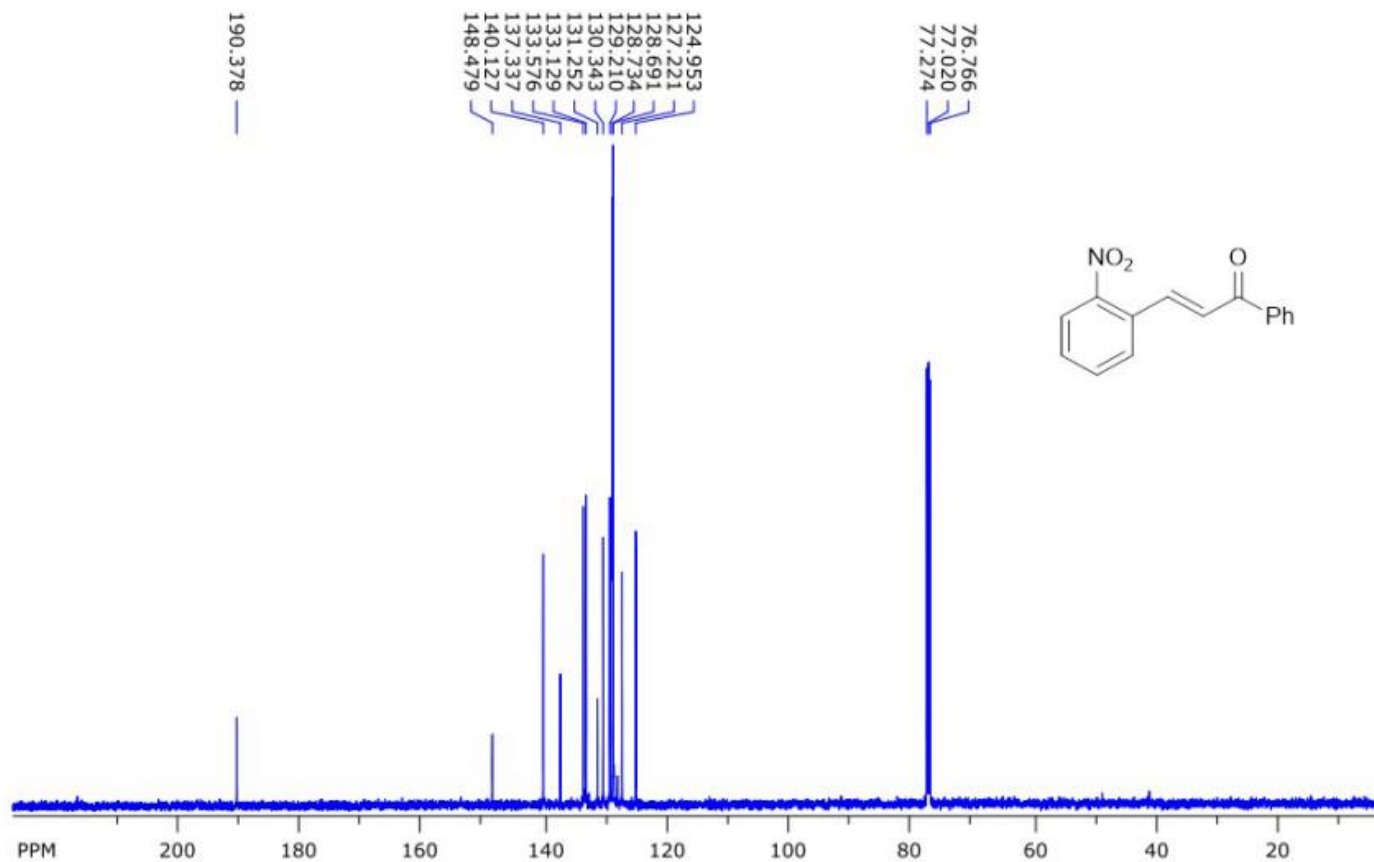

file: ...etones\Fids part 1\IVA 2207\28\fid expt: <zgpg30>  
transmitter freq.: 125.772879 MHz  
time domain size: 65536 points  
width: 36057.69 Hz = 286.6889 ppm = 0.550197 Hz/pt  
number of scans: 512

freq. of 0 ppm: 125.757798 MHz  
processed size: 32768 complex points  
LB: 2.000 GF: 0.0000  
Hz/cm: 1128.700 ppm/cm: 8.97411

# Compound 3u

SpinWorks 4: SVS 367 1H CDCl3

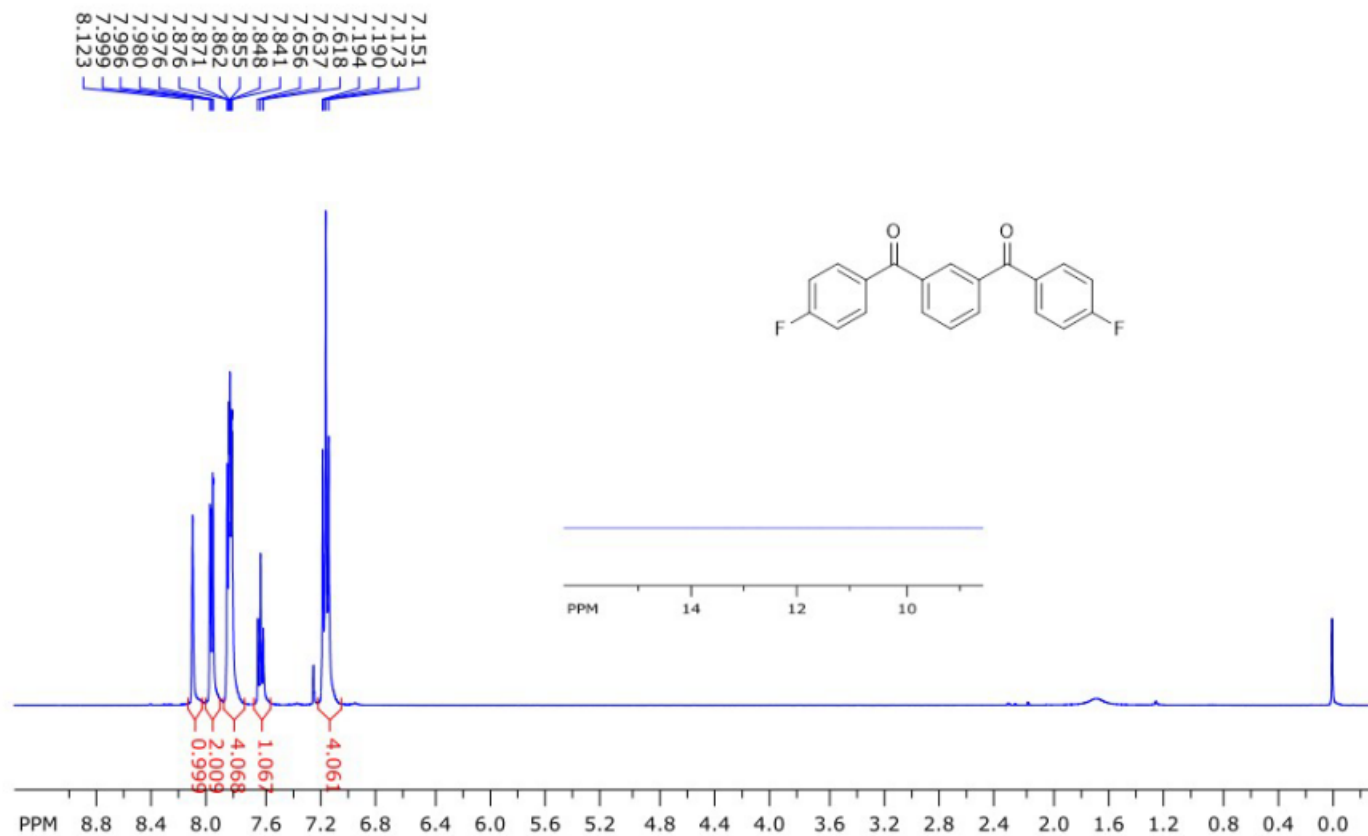

file: ...:\NAPO\NMR\JELA\nmr\jn-367-S\3\fid expt: <zg30>  
transmitter freq.: 400.132471 MHz  
time domain size: 65536 points  
width: 8196.72 Hz = 20.4850 ppm = 0.125072 Hz/pt  
number of scans: 16

freq. of 0 ppm: 400.130008 MHz  
processed size: 65536 complex points  
LB: 0.300 GF: 0.0000  
Hz/cm: 155.593 ppm/cm: 0.38885

# Compound 3u

SpinWorks 4: SVS 367 13C DMSO

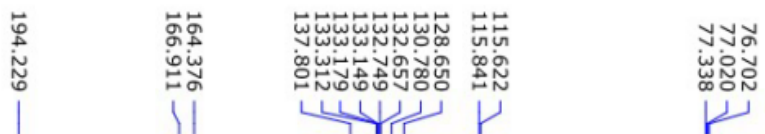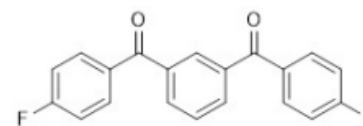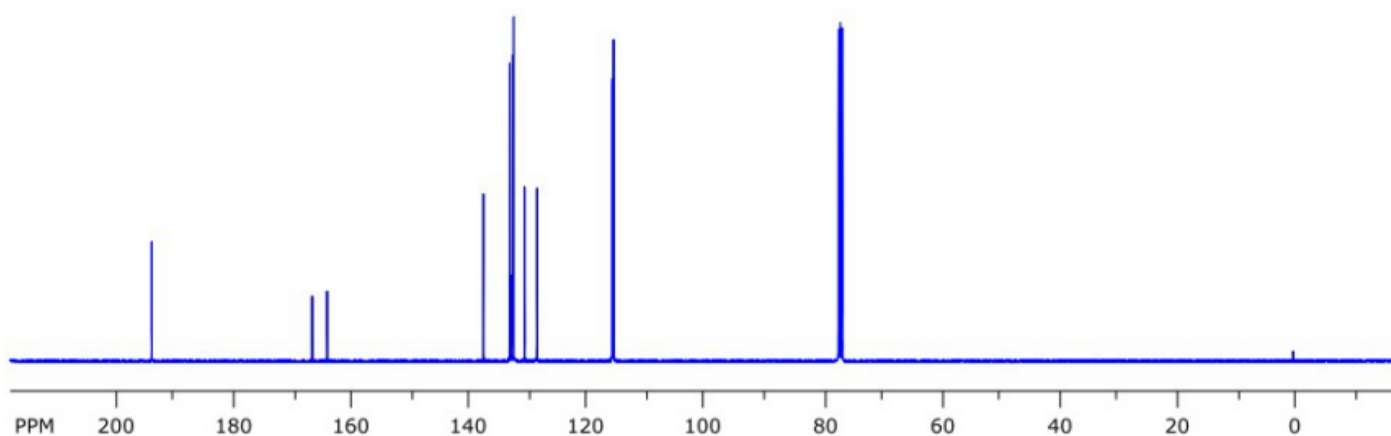

file: ...:\NAPO\NMR\JELA\nmr\jn-367-S\1\fid exp: <zpgp30>  
transmitter freq.: 100.622830 MHz  
time domain size: 65536 points  
width: 23809.52 Hz = 236.6215 ppm = 0.363305 Hz/pt  
number of scans: 1600

freq. of 0 ppm: 100.612769 MHz  
processed size: 32768 complex points  
LB: 1.000 GF: 0.0000  
Hz/cm: 952.381 ppm/cm: 9.46486

# Compound 3v

SpinWorks 4:

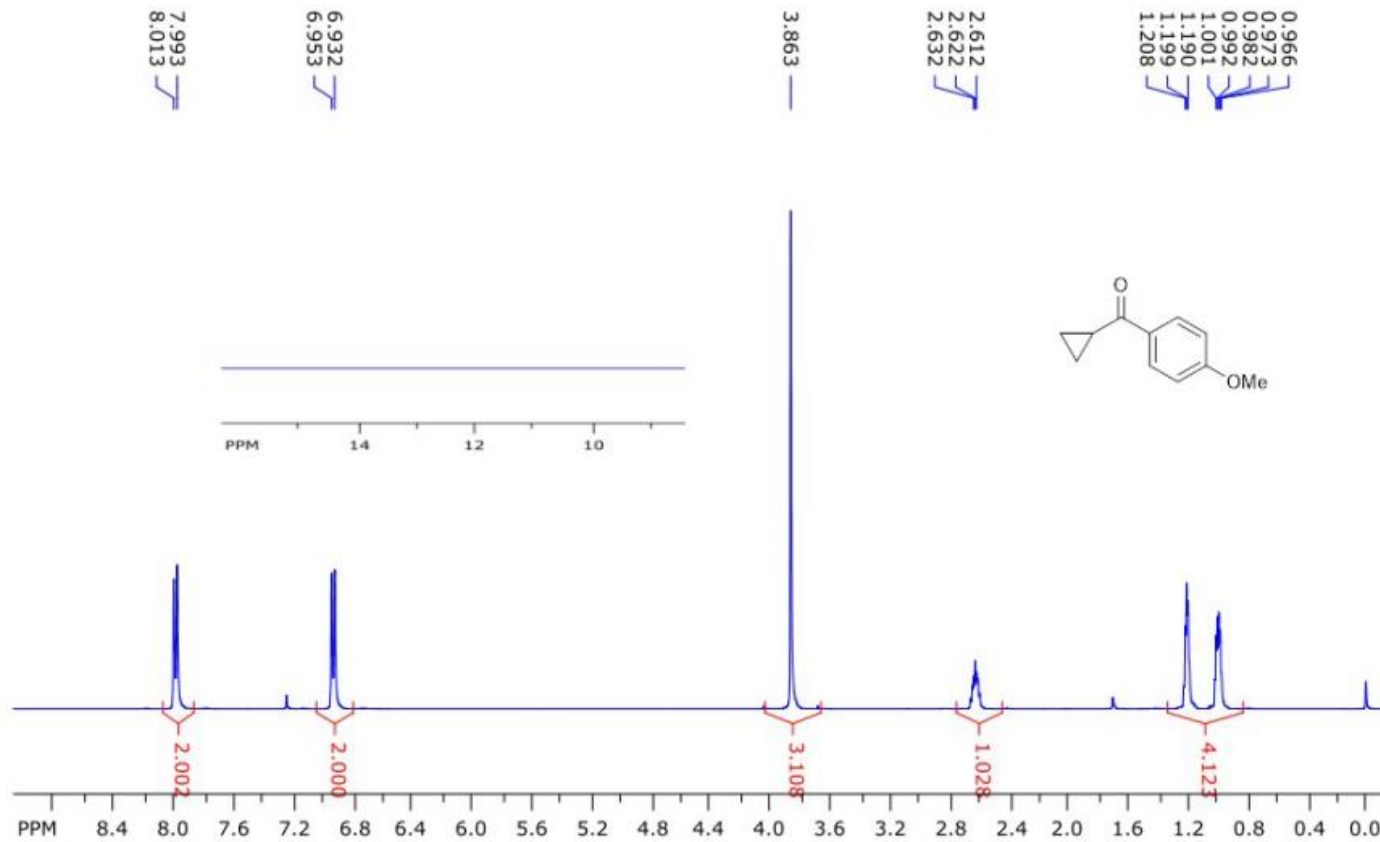

file: D:\NAPO\NMR\JELA\nmr\jn-368\2\fid exp: <zg30>  
 transmitter freq.: 400.132471 MHz  
 time domain size: 65536 points  
 width: 8196.72 Hz = 20.4850 ppm = 0.125072 Hz/pt  
 number of scans: 16

freq. of 0 ppm: 400.130010 MHz  
 processed size: 65536 complex points  
 LB: 0.300 GF: 0.0000  
 Hz/cm: 147.976 ppm/cm: 0.36982

# Compound 3v

SpinWorks 4: SVS 368 1H CDCl3

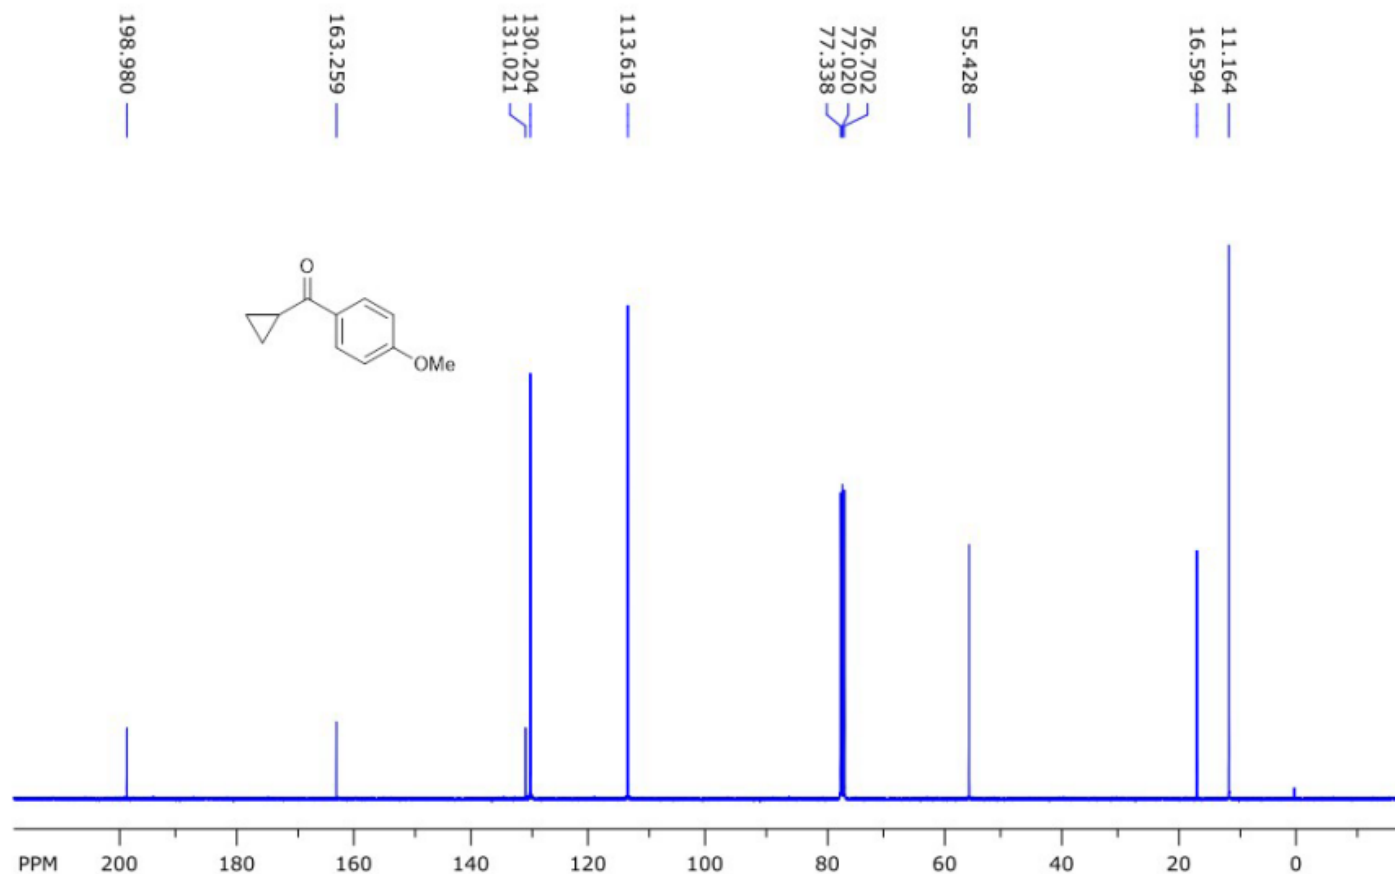

file: D:\NAPO\NMR\JELA\nmr\jn-368\1\fid expt: <zgpg30>  
transmitter freq.: 100.622830 MHz  
time domain size: 65536 points  
width: 23809.52 Hz = 236.6215 ppm = 0.363305 Hz/pt  
number of scans: 1024

freq. of 0 ppm: 100.612770 MHz  
processed size: 32768 complex points  
LB: 1.000 GF: 0.0000  
Hz/cm: 952.381 ppm/cm: 9.46486



# Compound 3w

SpinWorks 4: SVS 258 1H DMSO

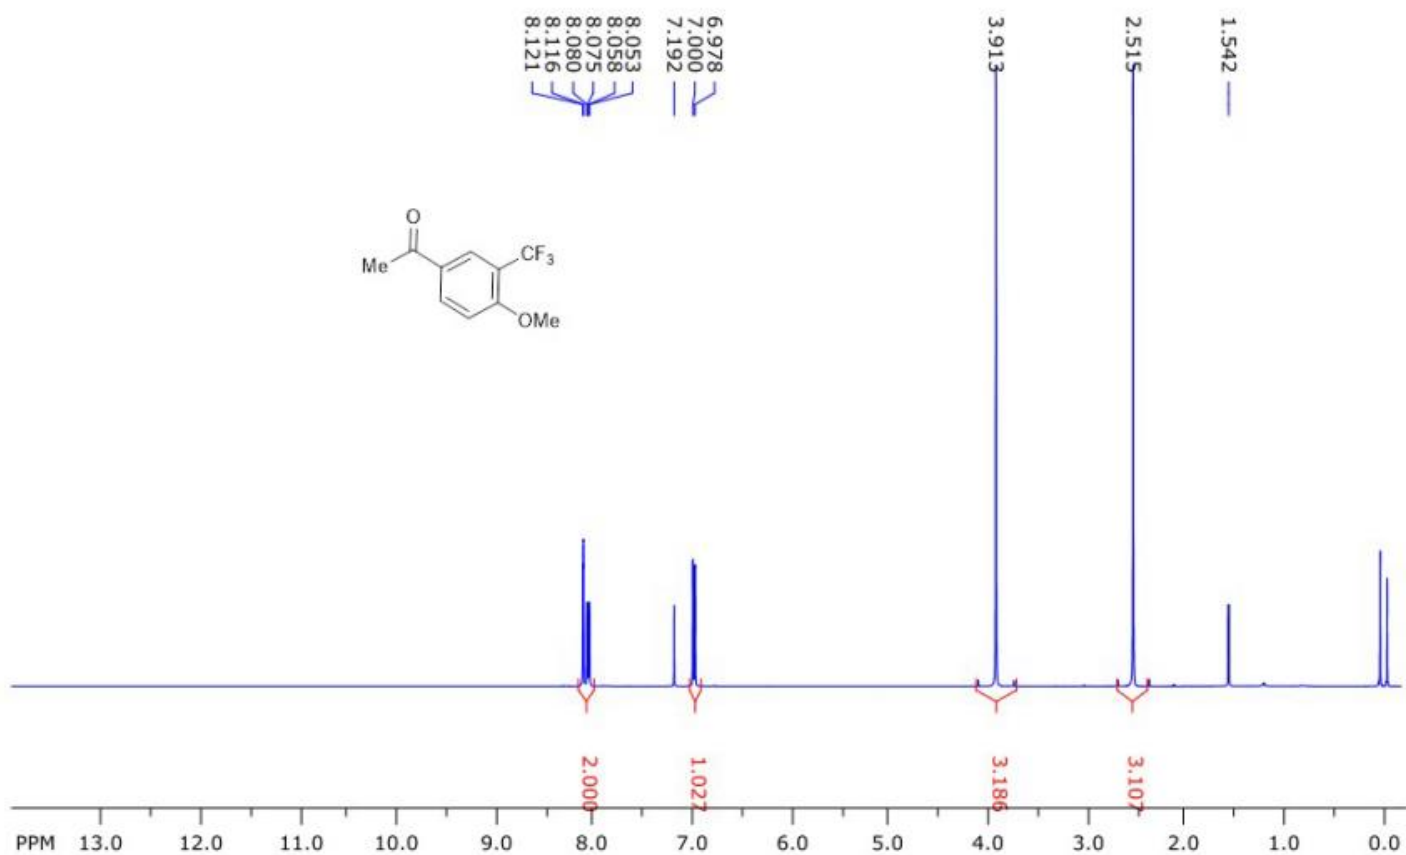

file: ... ketones\Fids part 1\SVS 258\1\fid expt: <zg30>  
transmitter freq.: 400.132471 MHz  
time domain size: 65536 points  
width: 8196.72 Hz = 20.4850 ppm = 0.125072 Hz/pt  
number of scans: 16

freq. of 0 ppm: 400.130036 MHz  
processed size: 65536 complex points  
LB: 0.300 GF: 0.0000  
Hz/cm: 226.683 ppm/cm: 0.56652

# Compound 3w

SpinWorks 4: SVS 258 13C DMSO

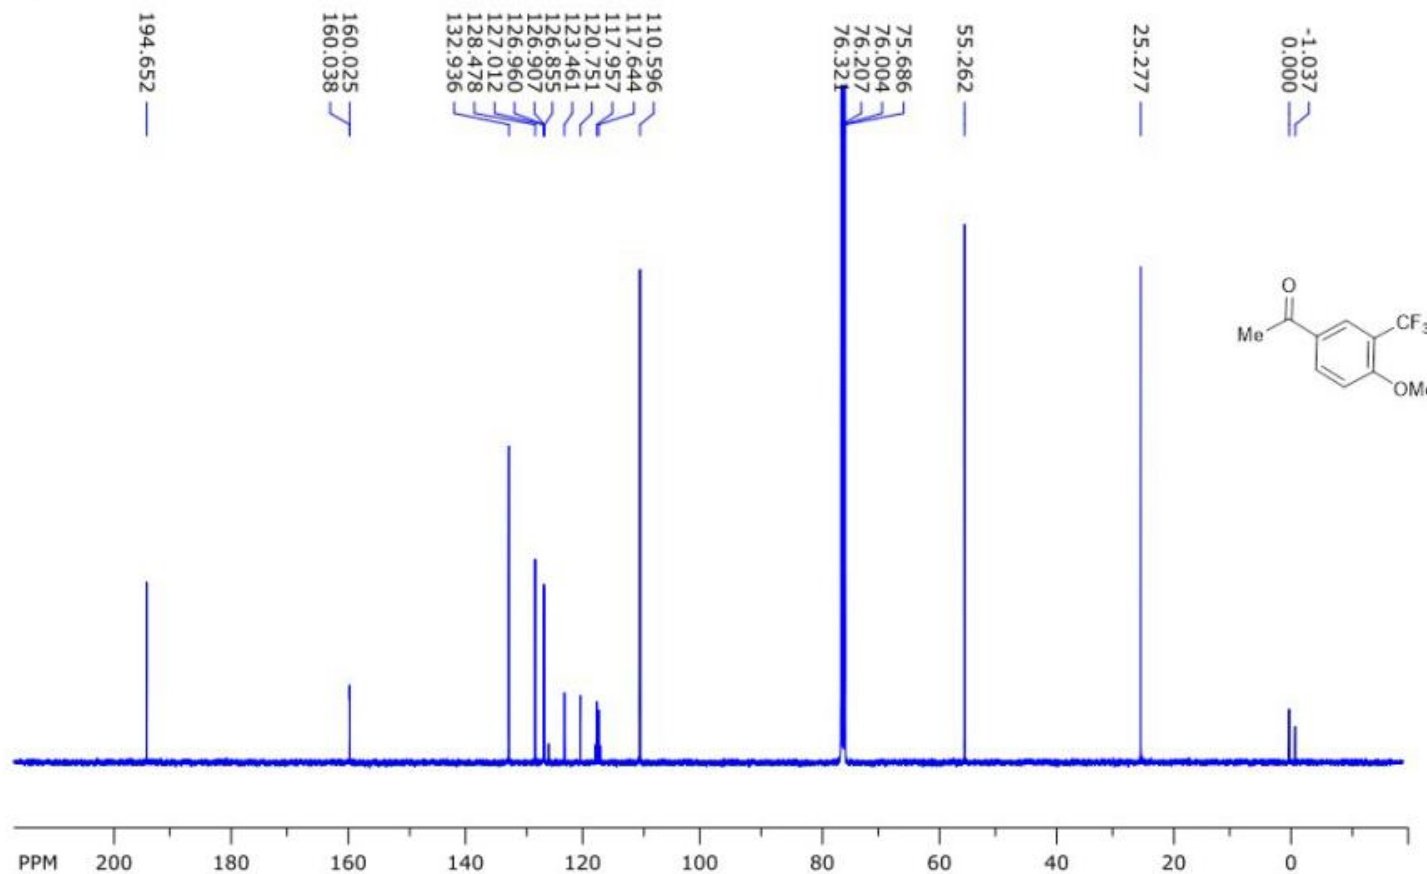

file: ... ketones\Fids part 1\SVS 258\2\fid expt: <zpgg30>  
transmitter freq.: 100.622830 MHz  
time domain size: 65536 points  
width: 23809.52 Hz = 236.6215 ppm = 0.363305 Hz/pt  
number of scans: 5000

freq. of 0 ppm: 100.612871 MHz  
processed size: 32768 complex points  
LB: 1,000 GF: 0.0000  
Hz/cm: 952.381 ppm/cm: 9.46486

# Compound 3x

SpinWorks 4: IVAB 3642 1H CDCI3

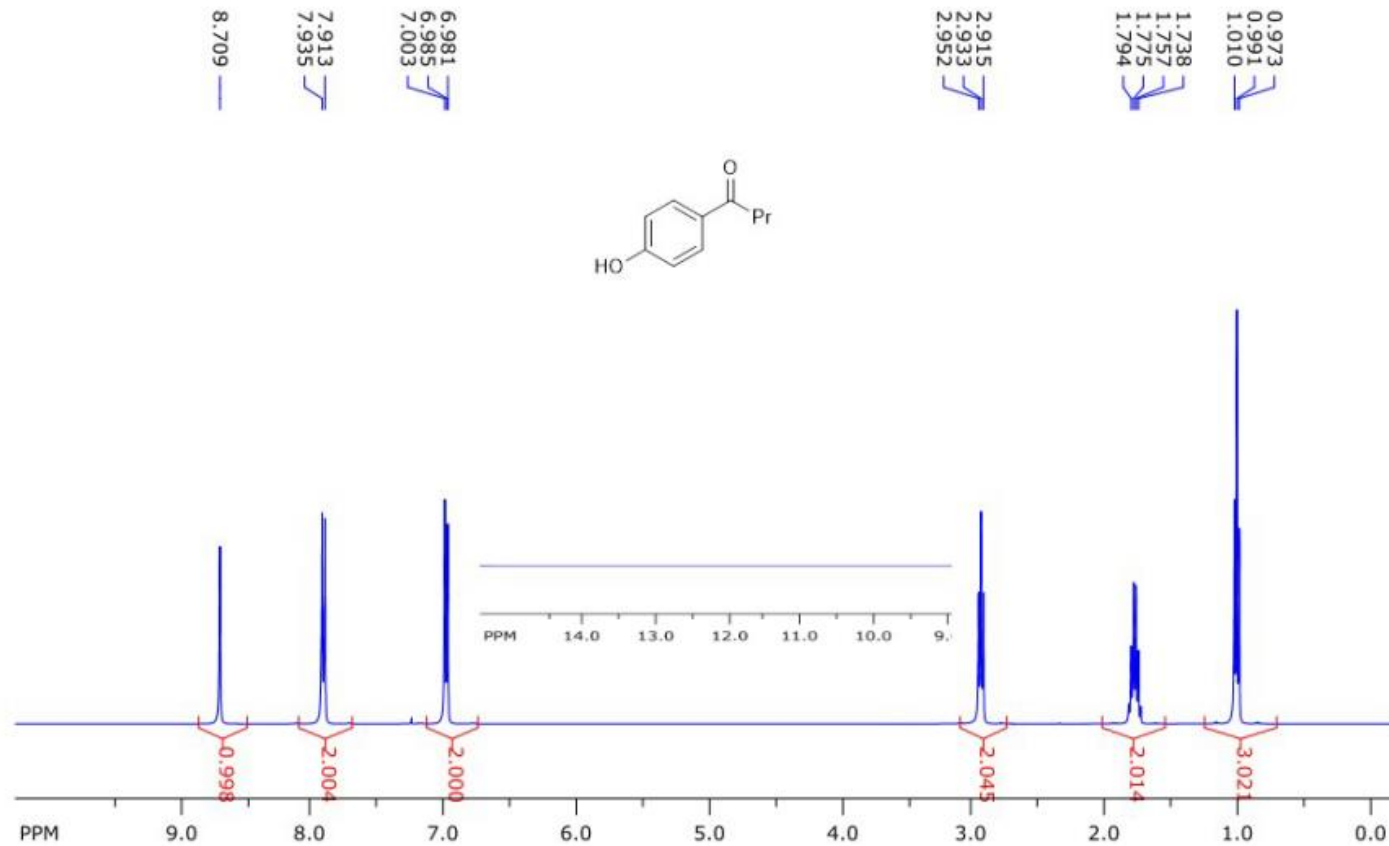

file: ...chael Slovakia\NMR\Ivab-3642\3\fid expt: <zg30>  
transmitter freq.: 400.133001 MHz  
time domain size: 65536 points  
width: 6393.86 Hz = 15.9793 ppm = 0.097563 Hz/pt  
number of scans: 64

freq. of 0 ppm: 400.130011 MHz  
processed size: 65536 complex points  
LB: 0.300 GF: 0.0000  
Hz/cm: 168.051 ppm/cm: 0.41999

# Compound 3x

SpinWorks 4: IVAB 3642 13c CDCl3

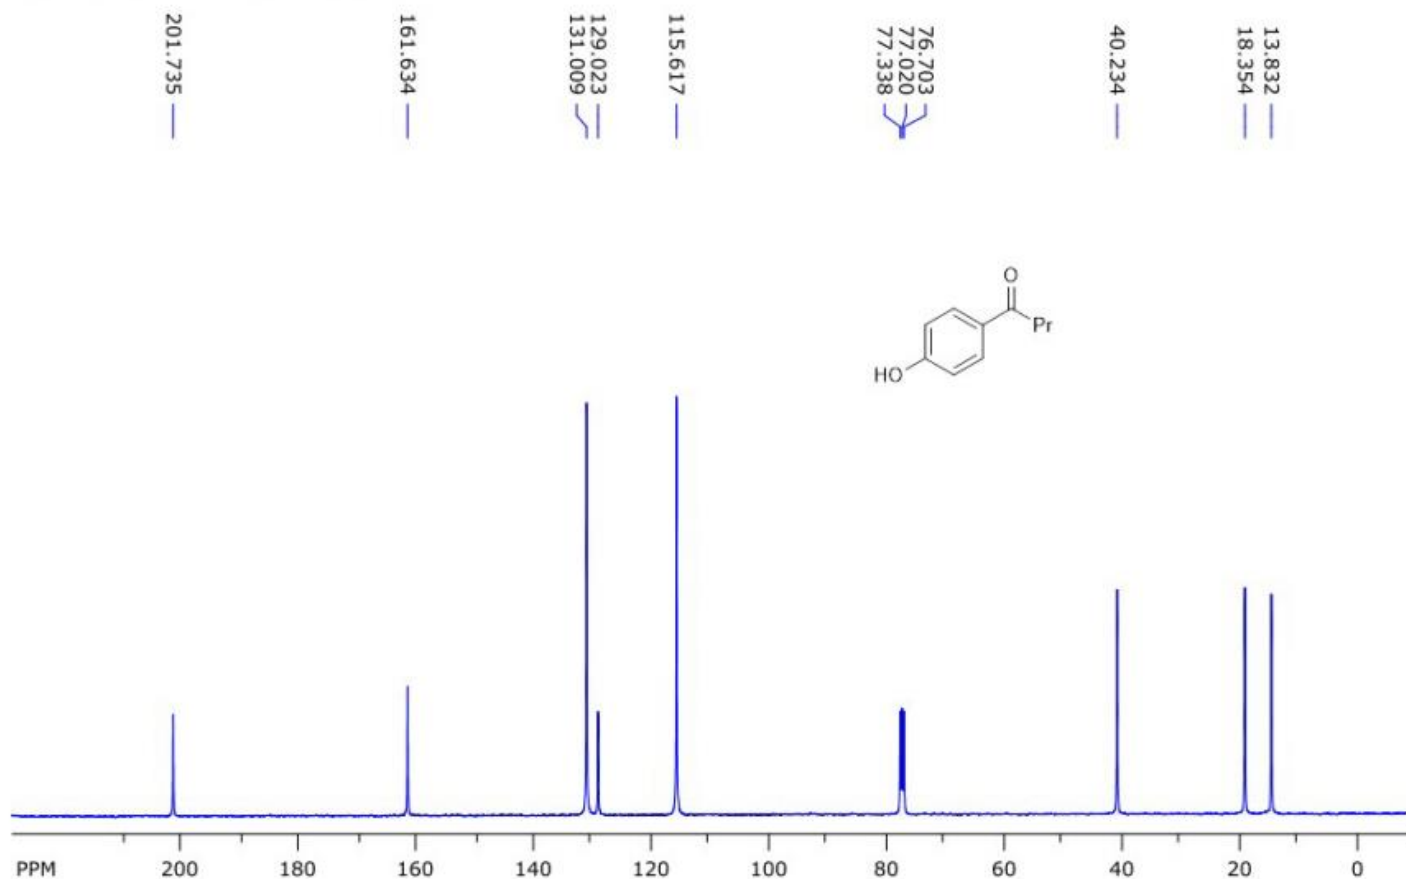

file: ...chael Slovakia\NMR\Ivab-3642\4\fid expt: <zgpg30>  
transmitter freq.: 100.623836 MHz  
time domain size: 65536 points  
width: 24038.46 Hz = 238.8943 ppm = 0.366798 Hz/pt  
number of scans: 1122

freq. of 0 ppm: 100.612777 MHz  
processed size: 32768 complex points  
LB: 10.000 GF: 0.0000  
Hz/cm: 961.538 ppm/cm: 9.55577

# Compound 3y

SpinWorks 4: IVA 977 1H CDCl3

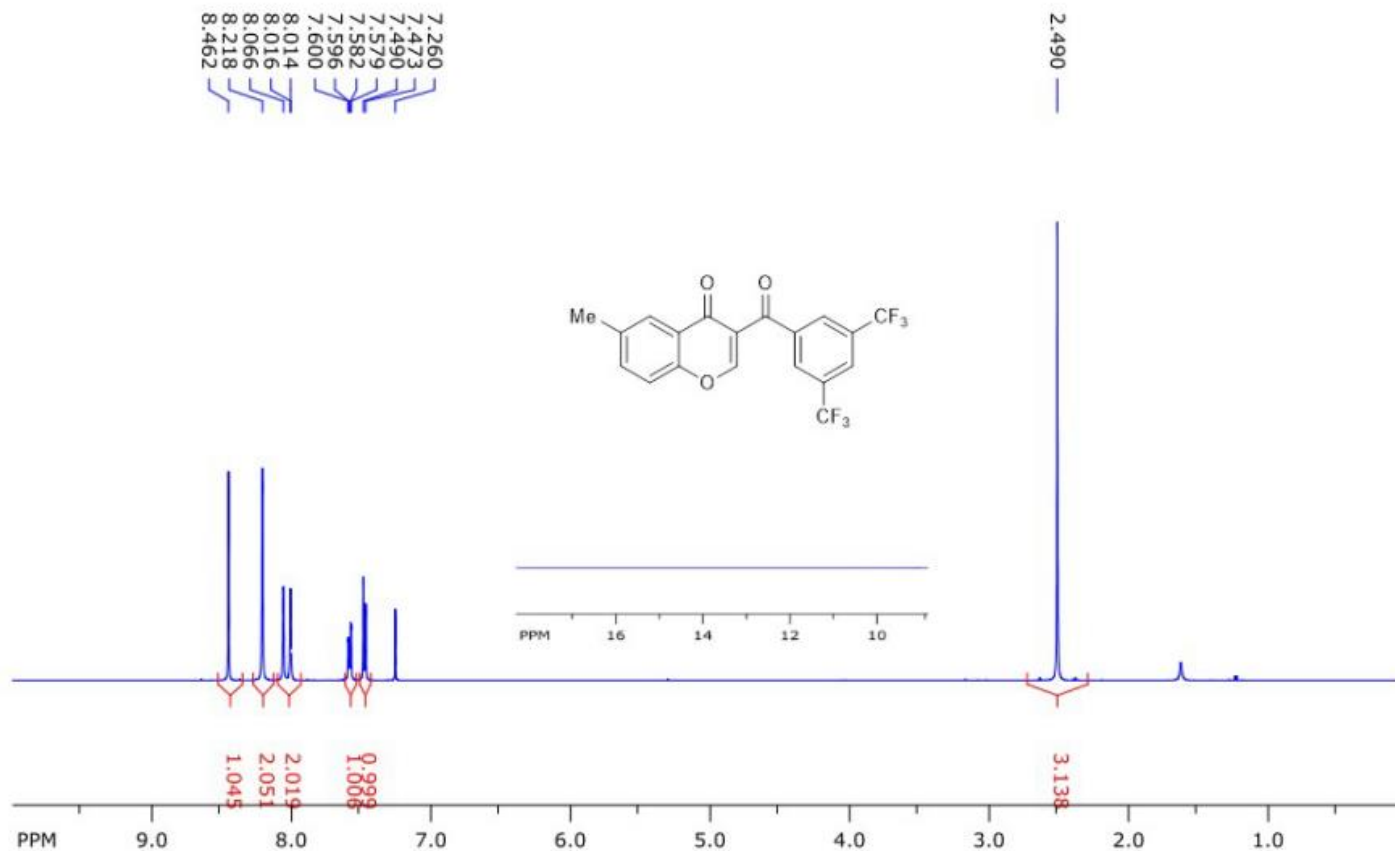

file: D:\NAPO\NMR\500-1\mkr11405\23\fid exp: <zg30>  
transmitter freq.: 500.133001 MHz  
time domain size: 65536 points  
width: 12335.53 Hz = 24.6645 ppm = 0.188225 Hz/pt  
number of scans: 24

freq. of 0 ppm: 500.130023 MHz  
processed size: 65536 complex points  
LB: 0.300 GF: 0.0000  
Hz/cm: 200.316 ppm/cm: 0.40053

# Compound 3y

SpinWorks 4: IVA 977 13C CDCl3

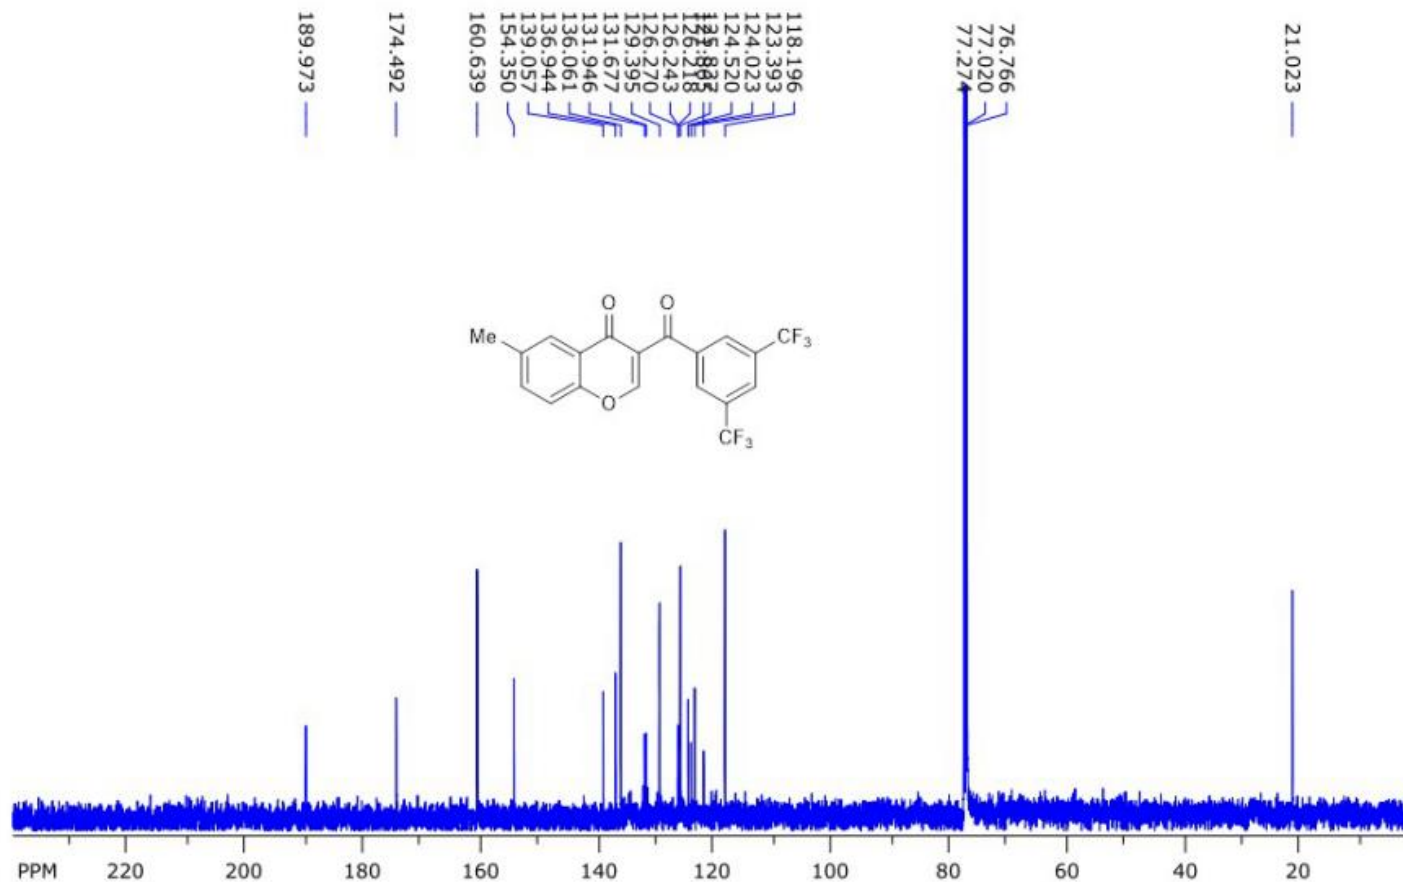

file: D:\NAPO\NMR\500-1\mkr11405\24\fid expt: <zgpg30>  
 transmitter freq.: 125.772879 MHz  
 time domain size: 65536 points  
 width: 36057.69 Hz = 286.6889 ppm = 0.550197 Hz/pt  
 number of scans: 256

freq. of 0 ppm: 125.757792 MHz  
 processed size: 32768 complex points  
 LB: 2.000 GF: 0.0000  
 Hz/cm: 1209.369 ppm/cm: 9.61550

# Compound 3z

SpinWorks 4: IVA 1033 1H CDCl3

7.143  
7.468  
7.471  
7.552  
7.719  
7.722  
7.736  
7.912  
7.917  
8.307  
8.310

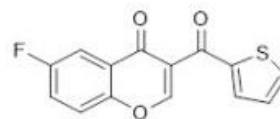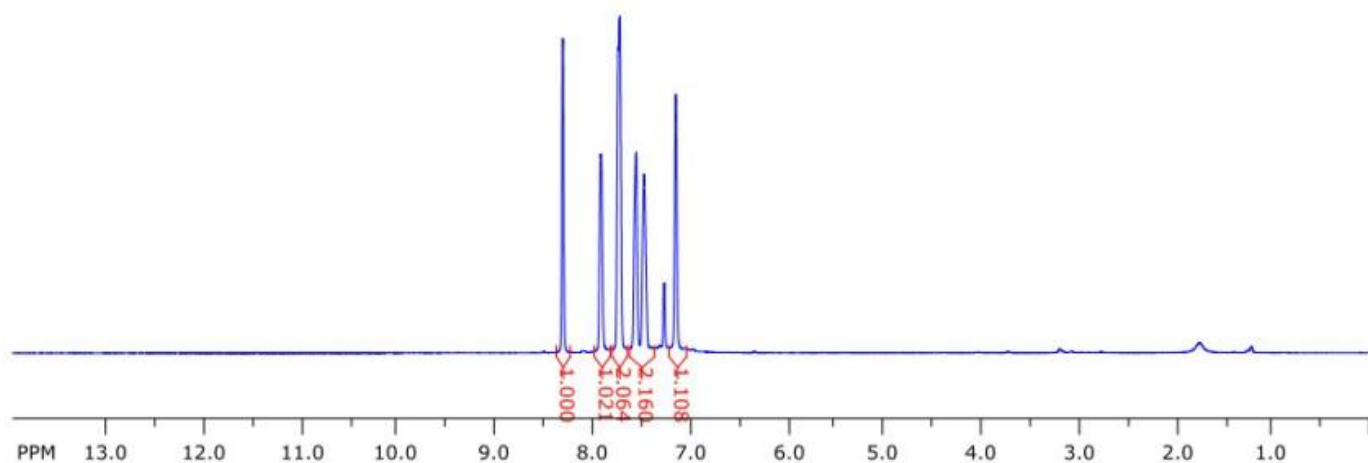

file: ...ketones\Fids part 1\IVA 1033\1\fid expt: <zg30>  
transmitter freq.: 500.133001 MHz  
time domain size: 65536 points  
width: 12335.53 Hz = 24.6645 ppm = 0.188225 Hz/pt  
number of scans: 32

freq. of 0 ppm: 500.130021 MHz  
processed size: 65536 complex points  
LB: 0.300 GF: 0.0000  
Hz/cm: 281.319 ppm/cm: 0.56249

# Compound 3z

SpinWorks 4: IVA 1033 13C CDCl3

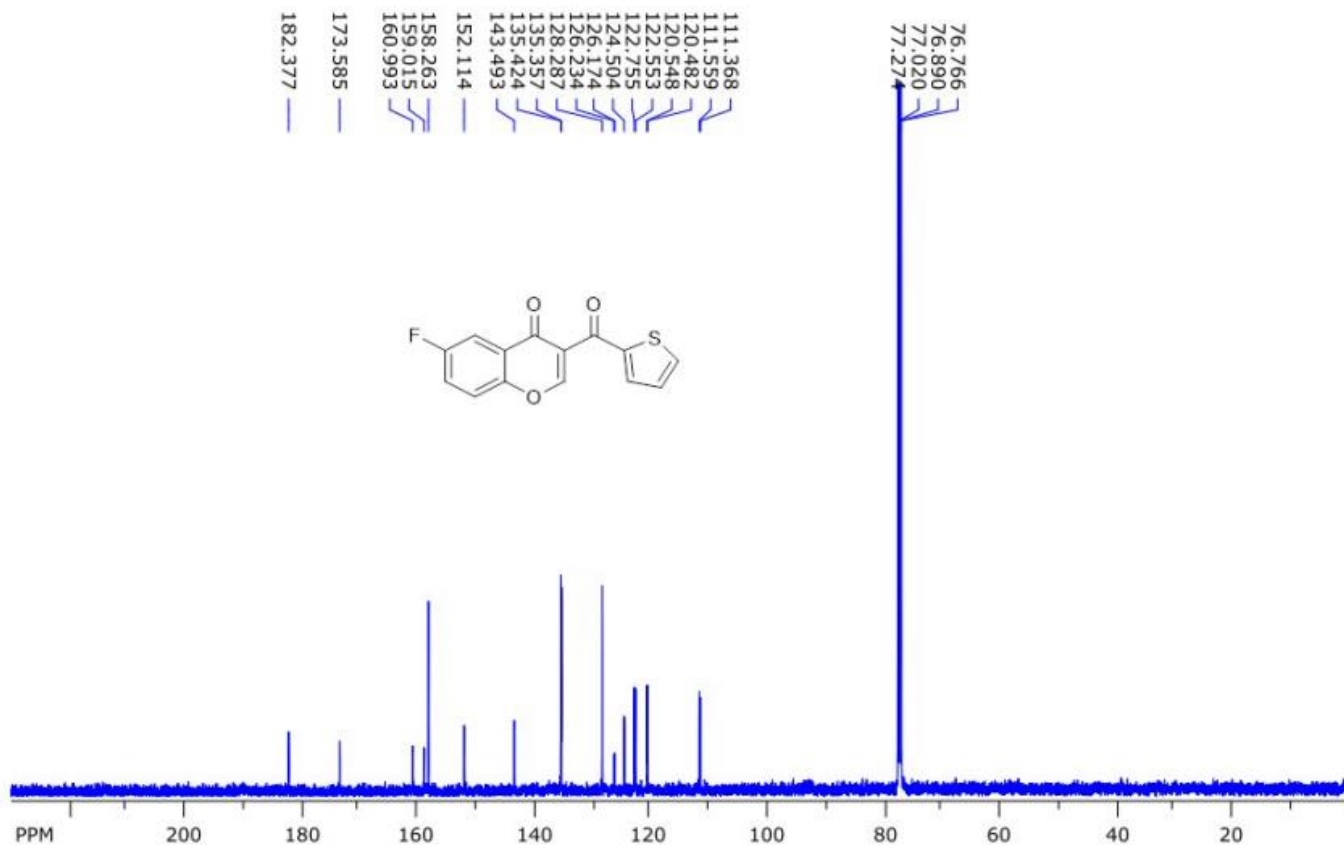

file: ...ketones\Fids part 1\IVA 1033\2\fid exp: <zggp30>  
transmitter freq.: 125.772879 MHz  
time domain size: 65536 points  
width: 36057.69 Hz = 286.6889 ppm = 0.550197 Hz/pt  
number of scans: 512

freq. of 0 ppm: 125.757796 MHz  
processed size: 32768 complex points  
LB: 2.000 GF: 0.0000  
Hz/cm: 1166.275 ppm/cm: 9.27286



# Compound 3aa

SpinWorks 4: IVA 1219 1H CDCl3

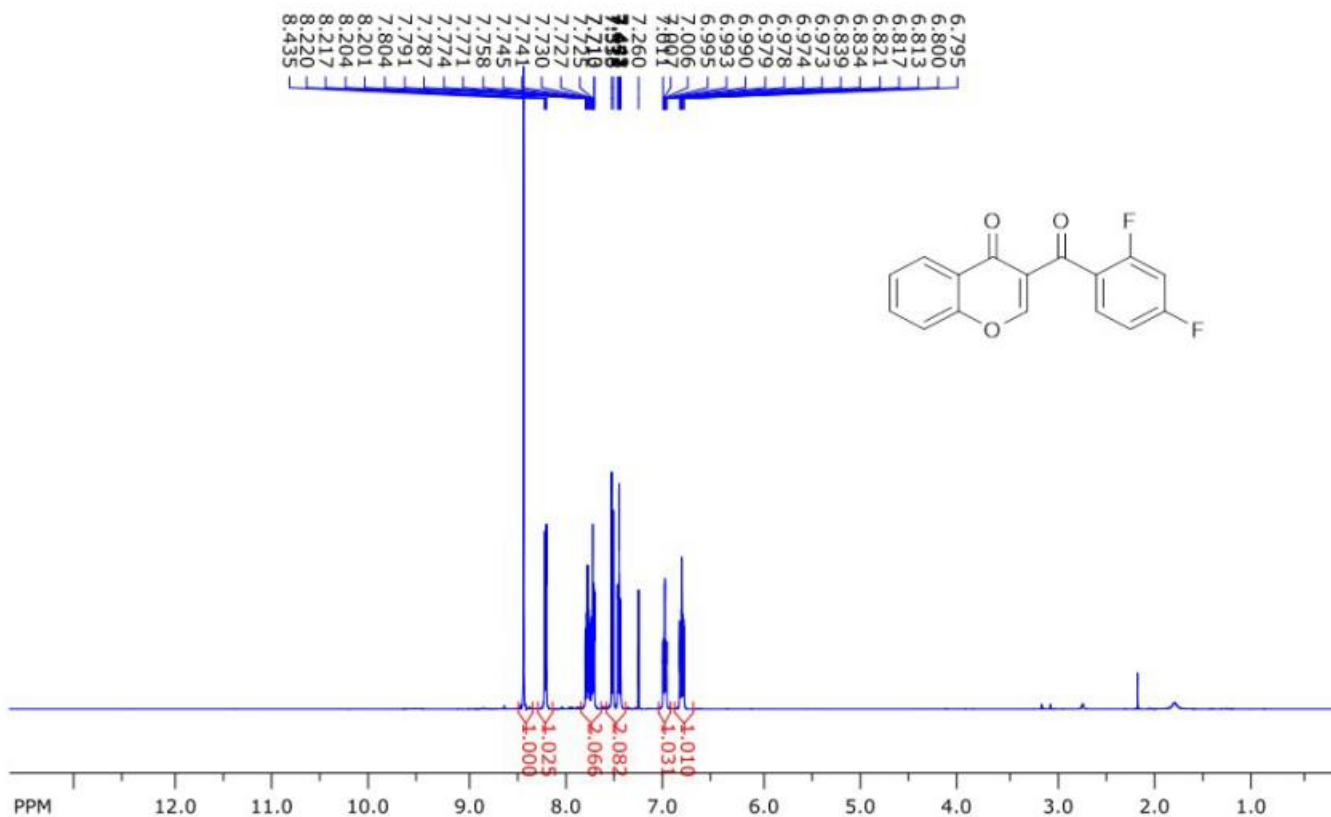

file: ...etones\Fids part 1\IVA 1219\15\fid expt: <zg30>  
 transmitter freq.: 500.133001 MHz  
 time domain size: 65536 points  
 width: 12335.53 Hz = 24.6645 ppm = 0.188225 Hz/pt  
 number of scans: 32

freq. of 0 ppm: 500.130023 MHz  
 processed size: 65536 complex points  
 LB: 0.300 GF: 0.0000  
 Hz/cm: 272.420 ppm/cm: 0.54469

# Compound 3aa

SpinWorks 4: IVA 1216 13C CDCL3

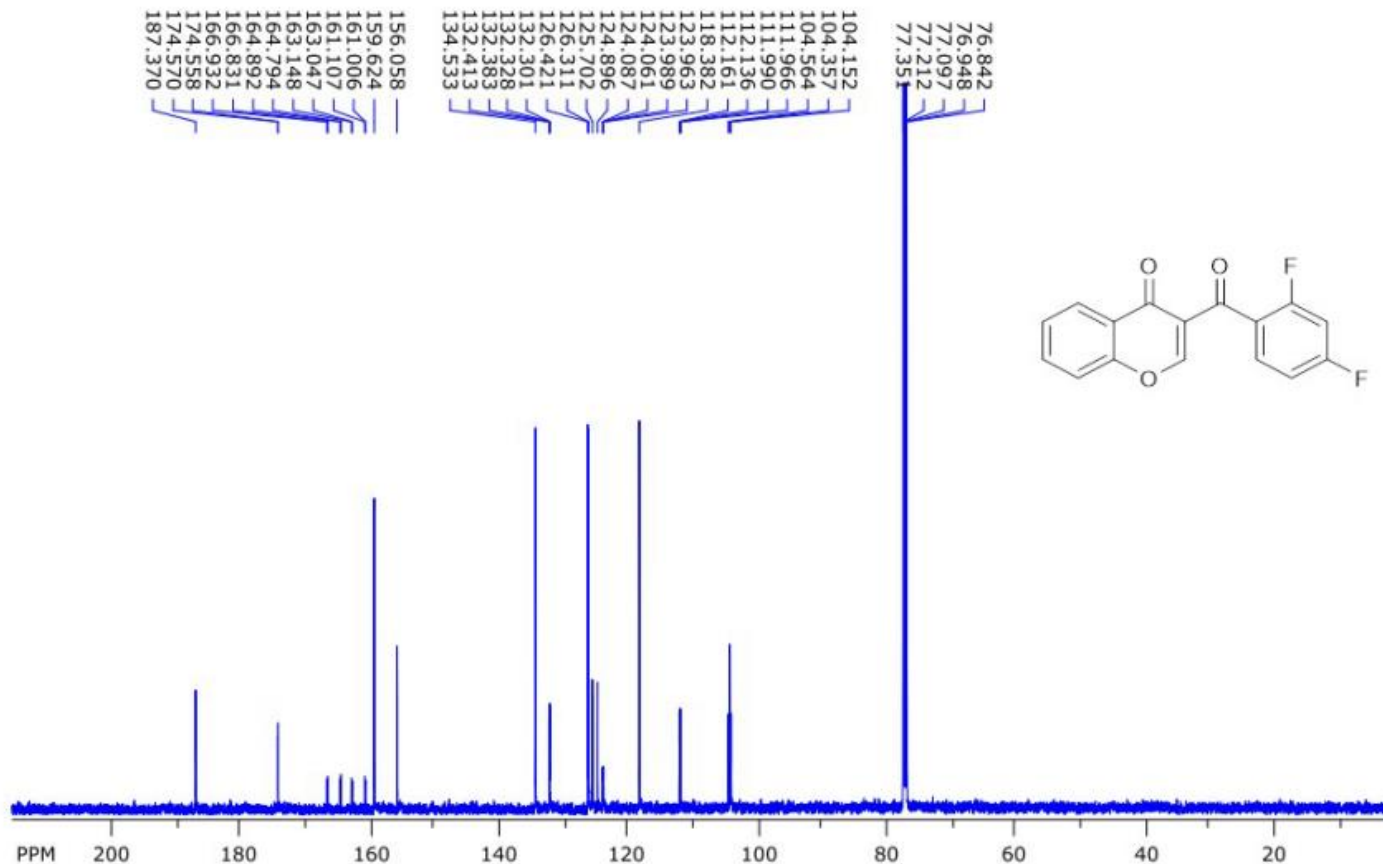

file: ...etones\Fids part 1\IVA 1219\16\fid expt: <zggp30>  
 transmitter freq.: 125.772879 MHz  
 time domain size: 65536 points  
 width: 36057.69 Hz = 286.6889 ppm = 0.550197 Hz/pt  
 number of scans: 512

freq. of 0 ppm: 125.757789 MHz  
 processed size: 32768 complex points  
 LB: 2.000 GF: 0.0000  
 Hz/cm: 1078.118 ppm/cm: 8.57194

# Compound 7a

SpinWorks 4: IVA 1984 1H DMSO

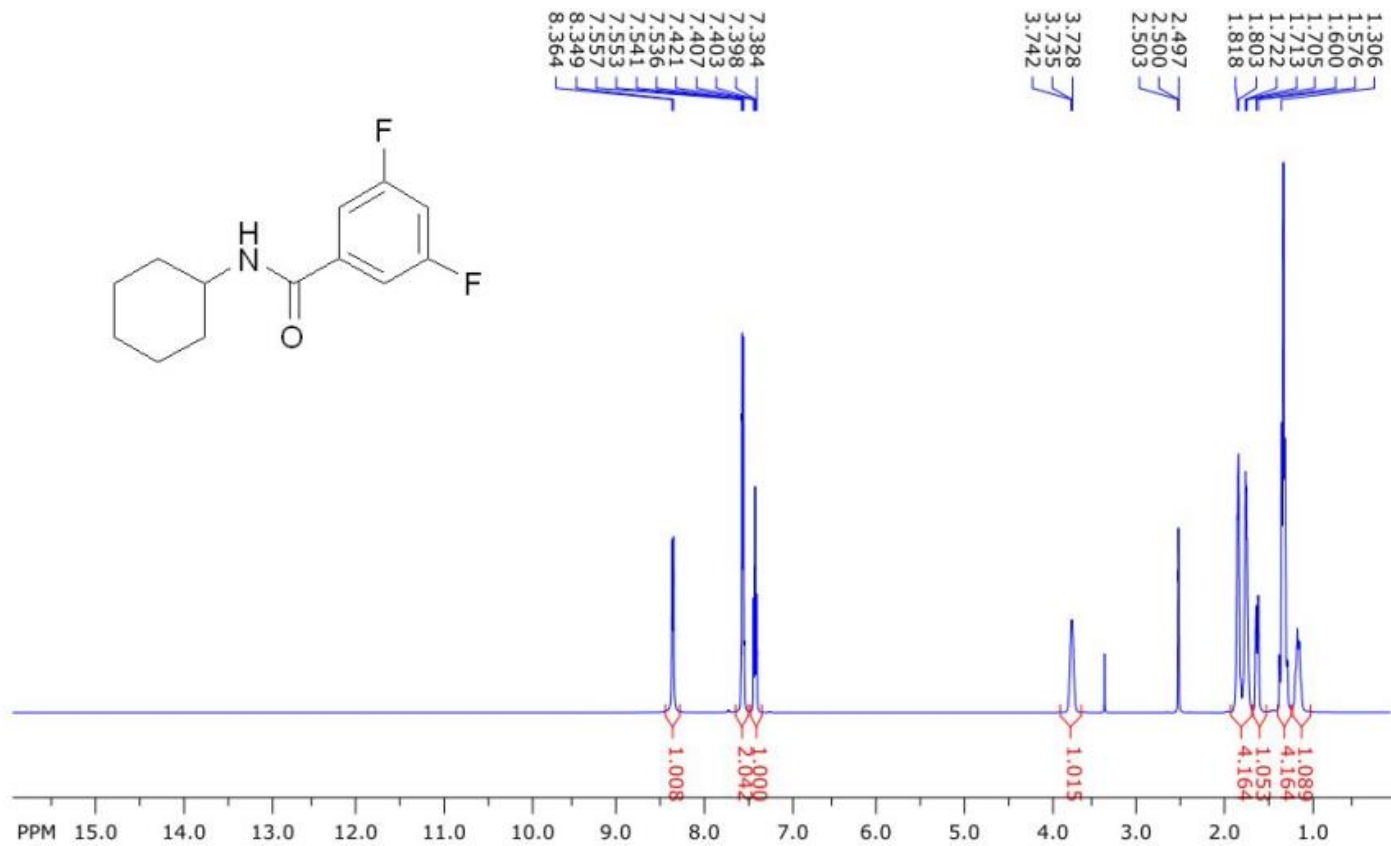

file: D:\NAPO\NMR\500-2\mkr11903\15\fid exp: <zg30>  
 transmitter freq.: 500.133001 MHz  
 time domain size: 65536 points  
 width: 12335.53 Hz = 24.6645 ppm = 0.188225 Hz/pt  
 number of scans: 24

freq. of 0 ppm: 500.130005 MHz  
 processed size: 65536 complex points  
 LB: 0.300 GF: 0.0000  
 Hz/cm: 319.305 ppm/cm: 0.63844

# Compound 7a

SpinWorks 4: IVA 1984 13C DMSO

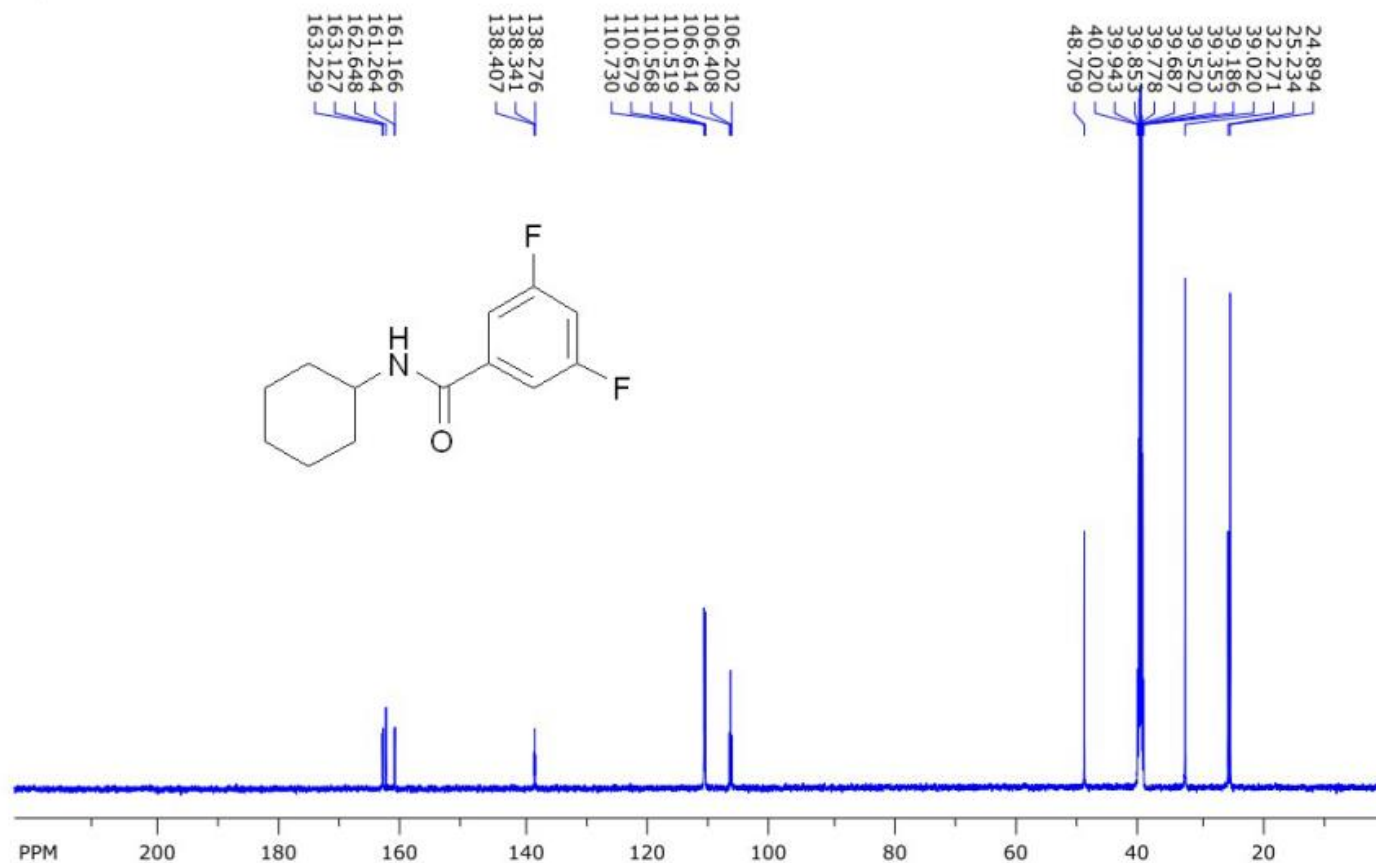

file: D:\NAPO\NMR\500-2\mkr11903\16\fid expt: <zpgg30>  
transmitter freq.: 125.772879 MHz  
time domain size: 65536 points  
width: 36057.69 Hz = 286.6889 ppm = 0.550197 Hz/pt  
number of scans: 512

freq. of 0 ppm: 125.757841 MHz  
processed size: 32768 complex points  
LB: 2.000 GF: 0.0000  
Hz/cm: 1124.809 ppm/cm: 8.94317

# Compound 7b

SpinWorks 4: IVA 1410 1H DMSO

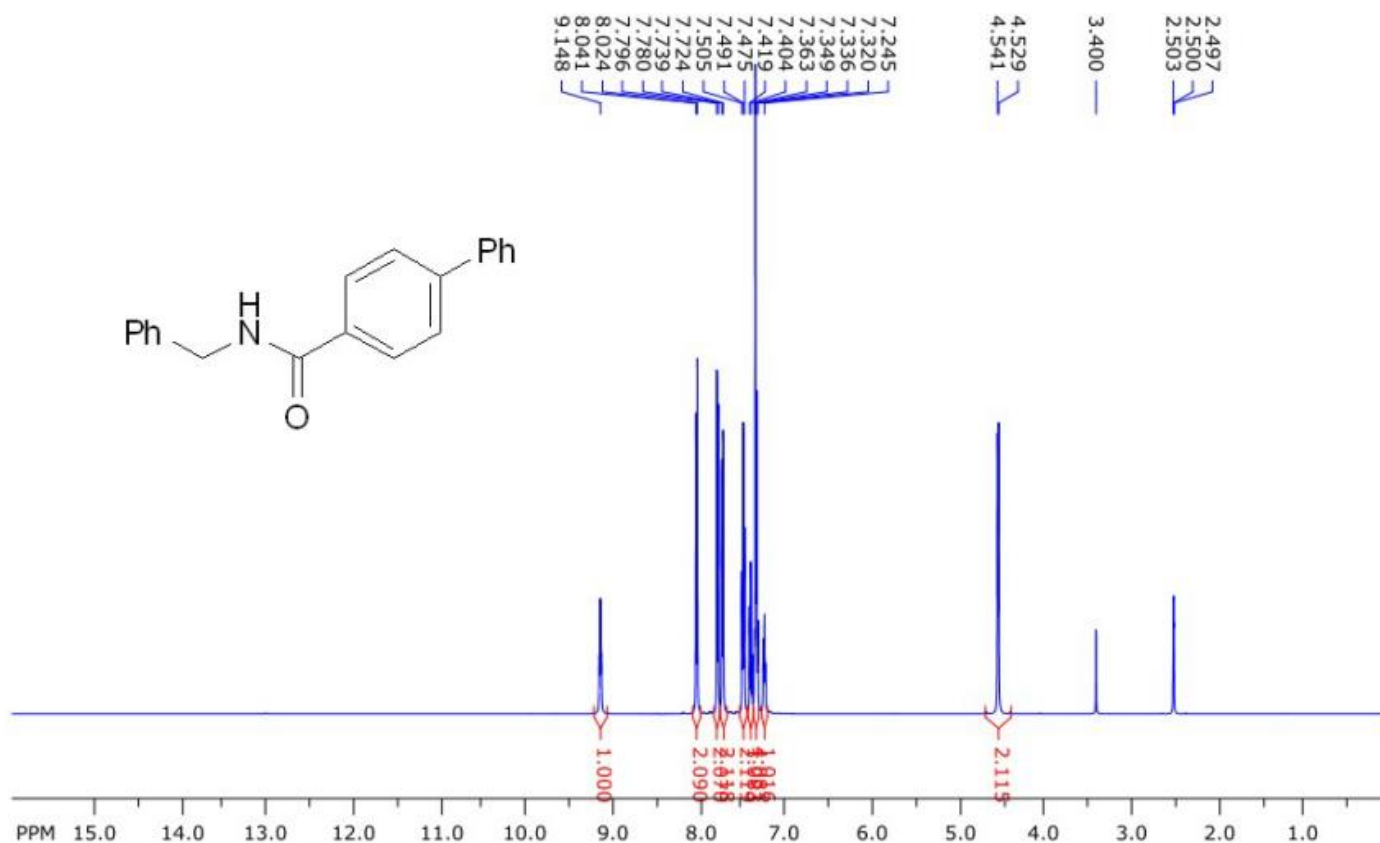

file: D:\NAPO\NMR\500-2\mkr20803\3\fid expt: <zg30>  
 transmitter freq.: 500.133001 MHz  
 time domain size: 65536 points  
 width: 12335.53 Hz = 24.6645 ppm = 0.188225 Hz/pt  
 number of scans: 24

freq. of 0 ppm: 500.130005 MHz  
 processed size: 65536 complex points  
 LB: 0.300 GF: 0.0000  
 Hz/cm: 318.759 ppm/cm: 0.63735

# Compound 7b

SpinWorks 4: IVA 1410 13C DMSO

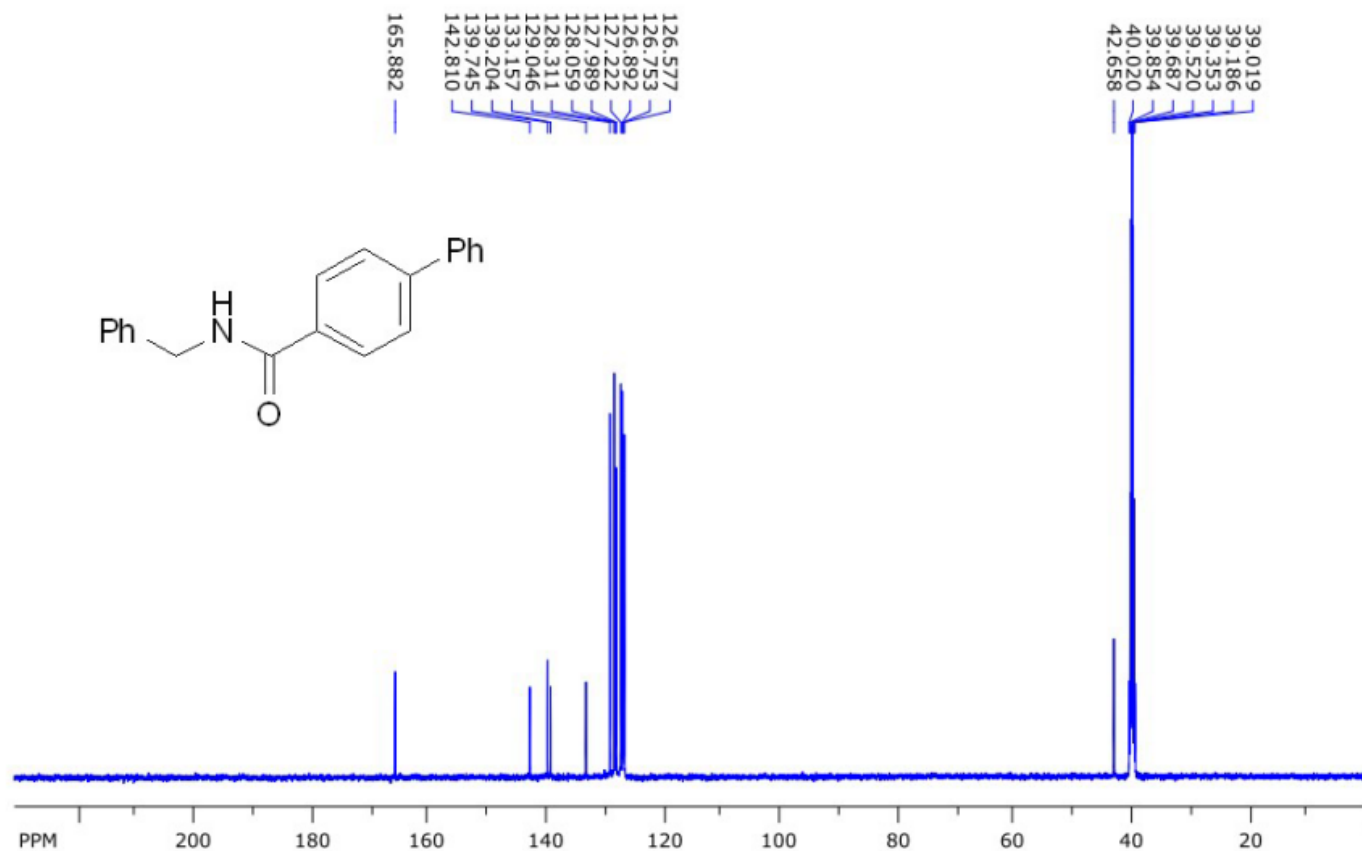

file: D:\NAPO\NMR\500-2\mkr20803\4\fid expt: <zgpg30>  
transmitter freq.: 125.772879 MHz  
time domain size: 65536 points  
width: 36057.69 Hz = 286.6889 ppm = 0.550197 Hz/pt  
number of scans: 512

freq. of 0 ppm: 125.757844 MHz  
processed size: 32768 complex points  
LB: 2.000 GF: 0.0000  
Hz/cm: 1164.695 ppm/cm: 9.26031

# Compound 7c

SpinWorks 4: IVA 1815 1H CDCl3

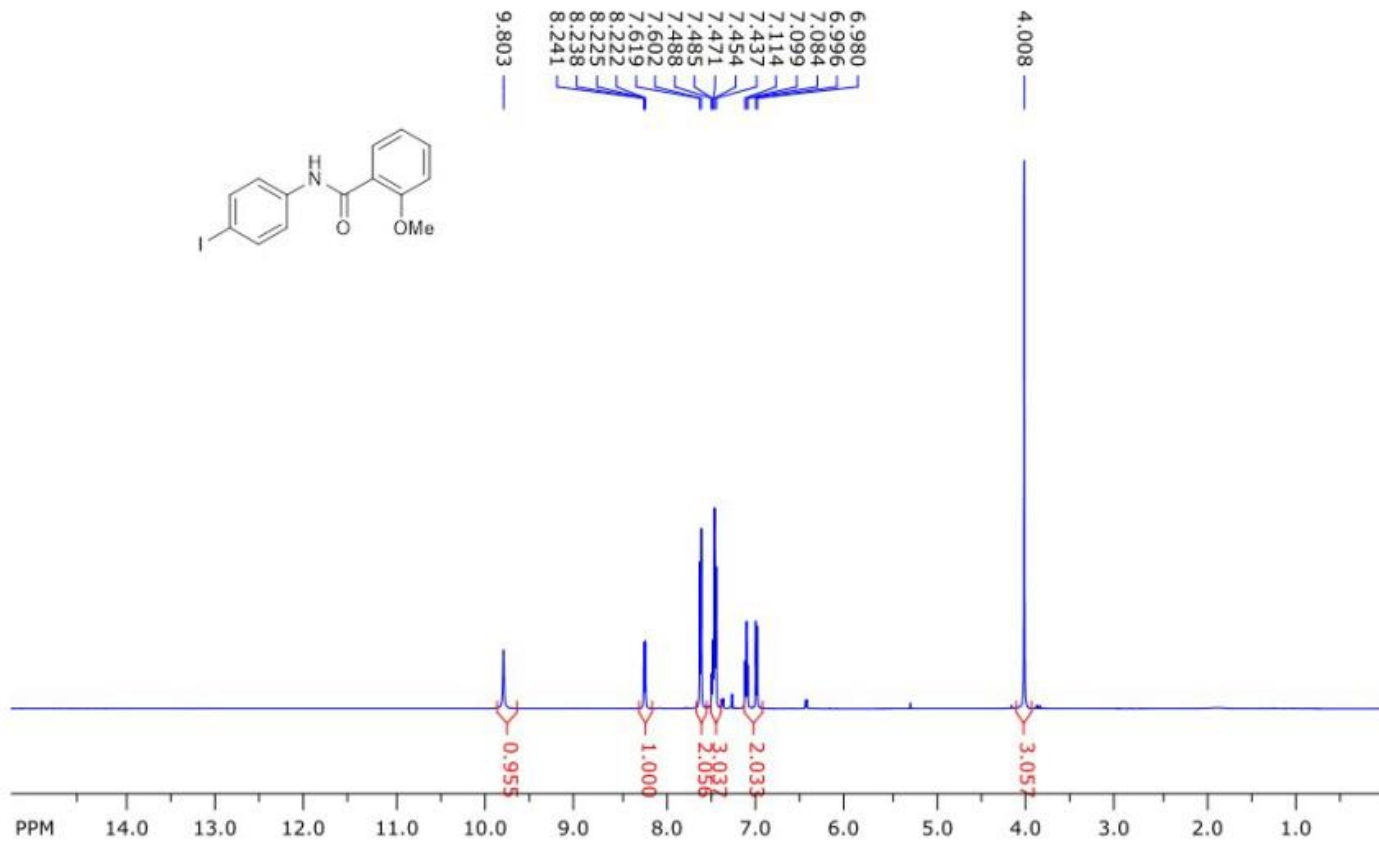

file: ...APO\NMR\500-2\mkr11706\21 1815\fid expt: <zg30>  
transmitter freq.: 500.133001 MHz  
time domain size: 65536 points  
width: 12335.53 Hz = 24.6645 ppm = 0.188225 Hz/pt  
number of scans: 24

freq. of 0 ppm: 500.130024 MHz  
processed size: 65536 complex points  
LB: 0.300 GF: 0.0000  
Hz/cm: 305.659 ppm/cm: 0.61116

# Compound 7c

SpinWorks 4: IVA 1815 13C CDCl3

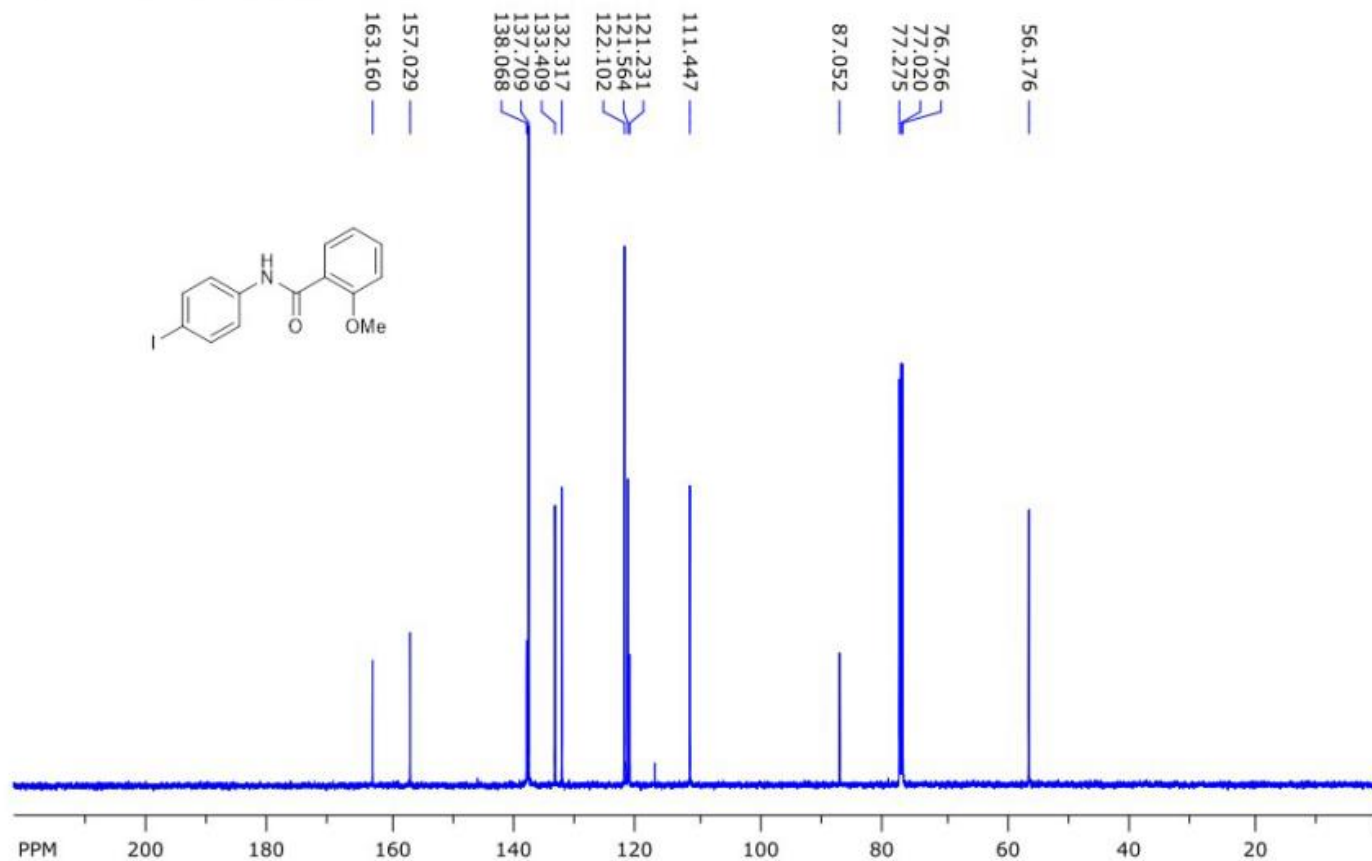

file: D:\NAPO\NMR\500-2\mkr11706\22\fid expt: <zgpg30>  
transmitter freq.: 125.772879 MHz  
time domain size: 65536 points  
width: 36057.69 Hz = 286.6889 ppm = 0.550197 Hz/pt  
number of scans: 512

freq. of 0 ppm: 125.757807 MHz  
processed size: 32768 complex points  
LB: 2.000 GF: 0.0000  
Hz/cm: 1121.618 ppm/cm: 8.91780



# Compound 7d

SpinWorks 4: IVA 2845 1H DMSO

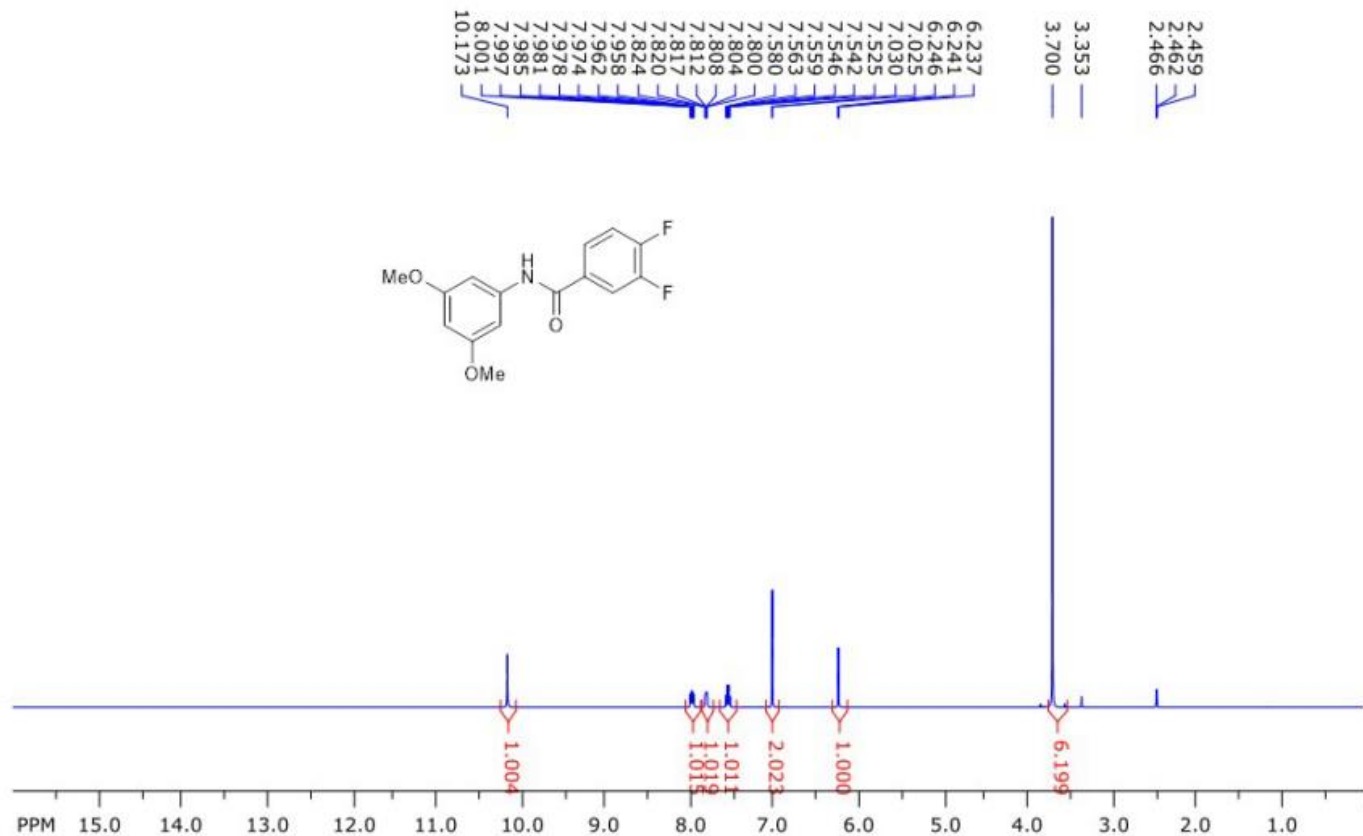

file: ...APO\NMR\500-2\mkr12207\19 2845\fid expt: <zg30>  
 transmitter freq.: 500.133001 MHz  
 time domain size: 65536 points  
 width: 12335.53 Hz = 24.6645 ppm = 0.188225 Hz/pt  
 number of scans: 24

freq. of 0 ppm: 500.130024 MHz  
 processed size: 65536 complex points  
 LB: 0.300 GF: 0.0000  
 Hz/cm: 320.942 ppm/cm: 0.64171

# Compound 7d

SpinWorks 4: IVA 2845 13C DMSO

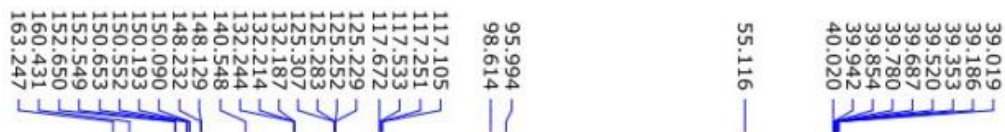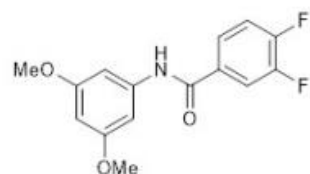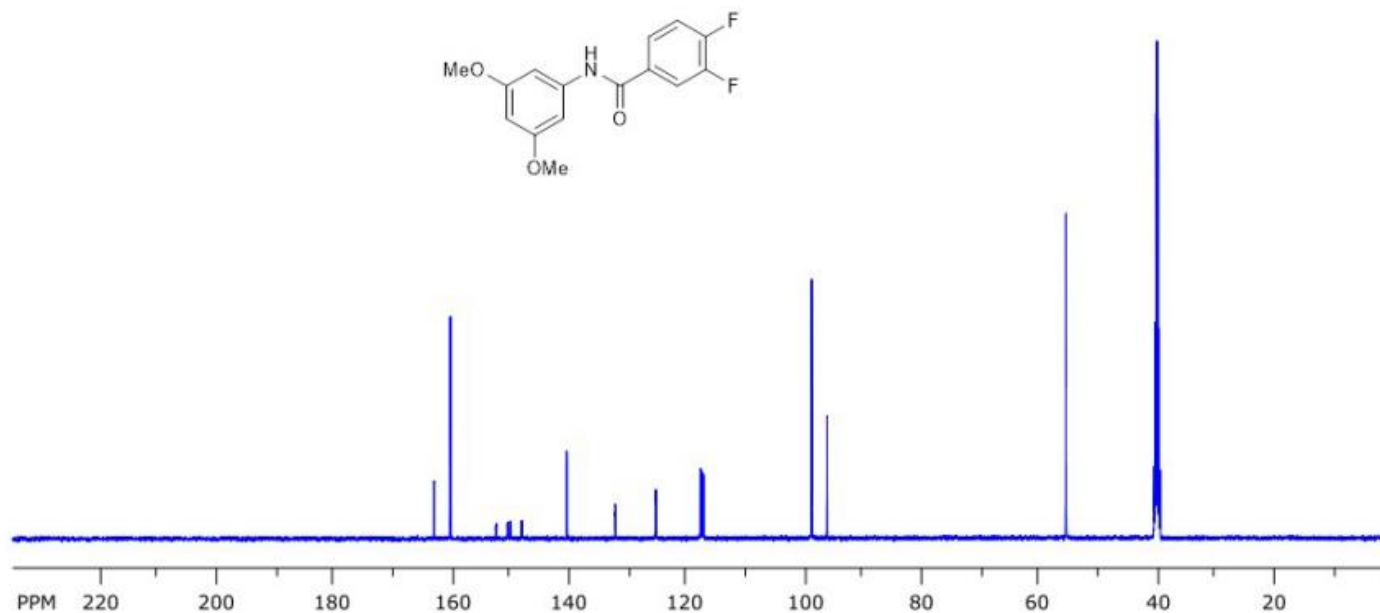

file: D:\NAPO\NMR\500-2\mkr12207\20\fid exp: <zgpg30>  
 transmitter freq.: 125.772879 MHz  
 time domain size: 65536 points  
 width: 36057.69 Hz = 286.6889 ppm = 0.550197 Hz/pt  
 number of scans: 512

freq. of 0 ppm: 125.757839 MHz  
 processed size: 32768 complex points  
 LB: 2.000 GF: 0.0000  
 Hz/cm: 1180.650 ppm/cm: 9.38716

# Compound 7e

SpinWorks 4: SVS 330 1H CDCI3

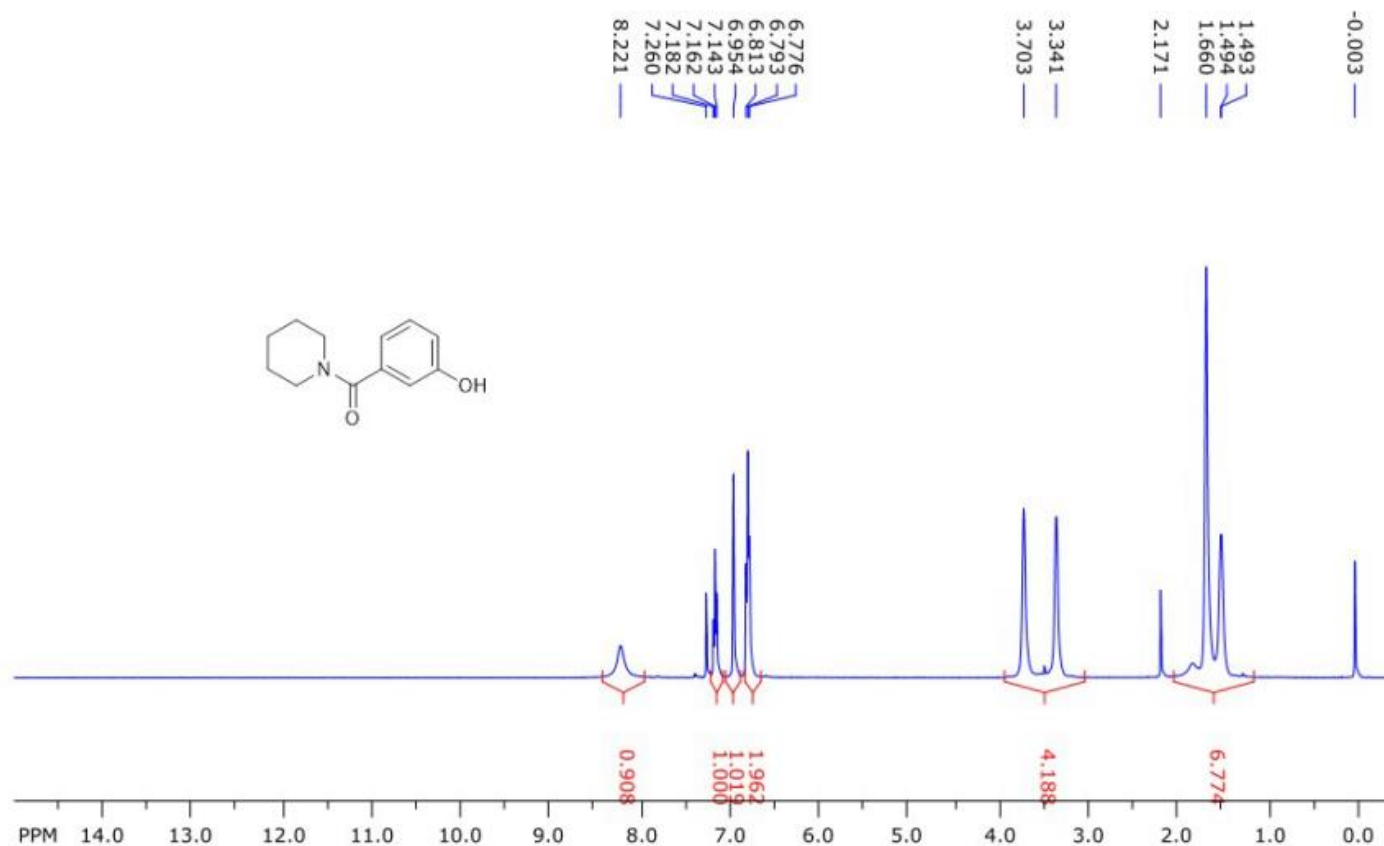

file: D:\NAPO\NMR\JELA\nmr\jn-330\2\fid exp: <zg30>  
transmitter freq.: 400.132471 MHz  
time domain size: 65536 points  
width: 8196.72 Hz = 20.4850 ppm = 0.125072 Hz/pt  
number of scans: 16

freq. of 0 ppm: 400.130009 MHz  
processed size: 65536 complex points  
LB: 0.300 GF: 0.0000  
Hz/cm: 245.902 ppm/cm: 0.61455

# Compound 7e

SpinWorks 4: SVS 330 13C CDCl3

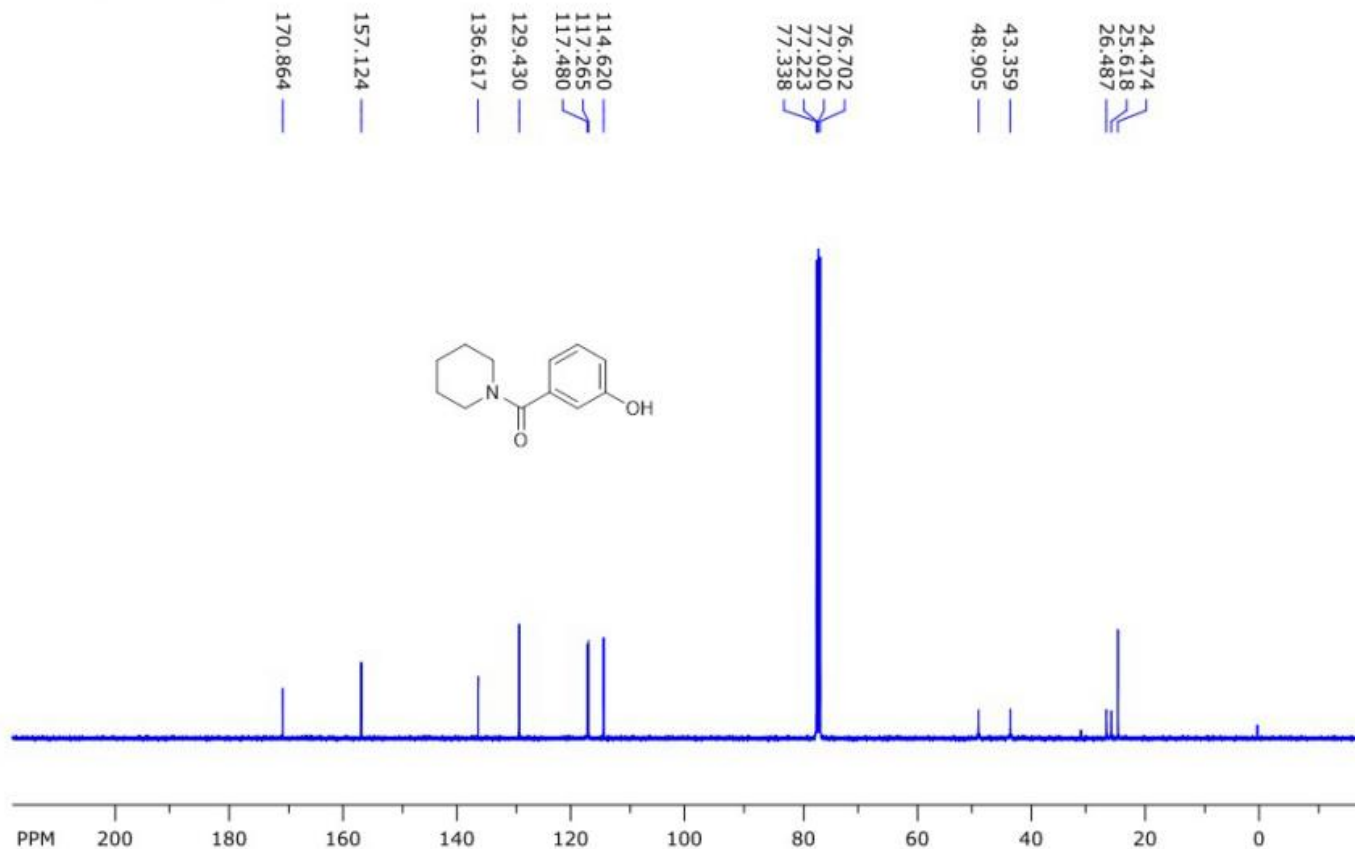

file: D:\NAPO\NMR\JELA\nmr\jn-330\1\fid expt: <zpgg30>  
transmitter freq.: 100.622830 MHz  
time domain size: 65536 points  
width: 23809.52 Hz = 236.6215 ppm = 0.363305 Hz/pt  
number of scans: 1024

freq. of 0 ppm: 100.612768 MHz  
processed size: 32768 complex points  
LB: 1.000 GF: 0.0000  
Hz/cm: 952.381 ppm/cm: 9.46486

# Compound 8

SpinWorks 4: IVA 1988 1H DMSO

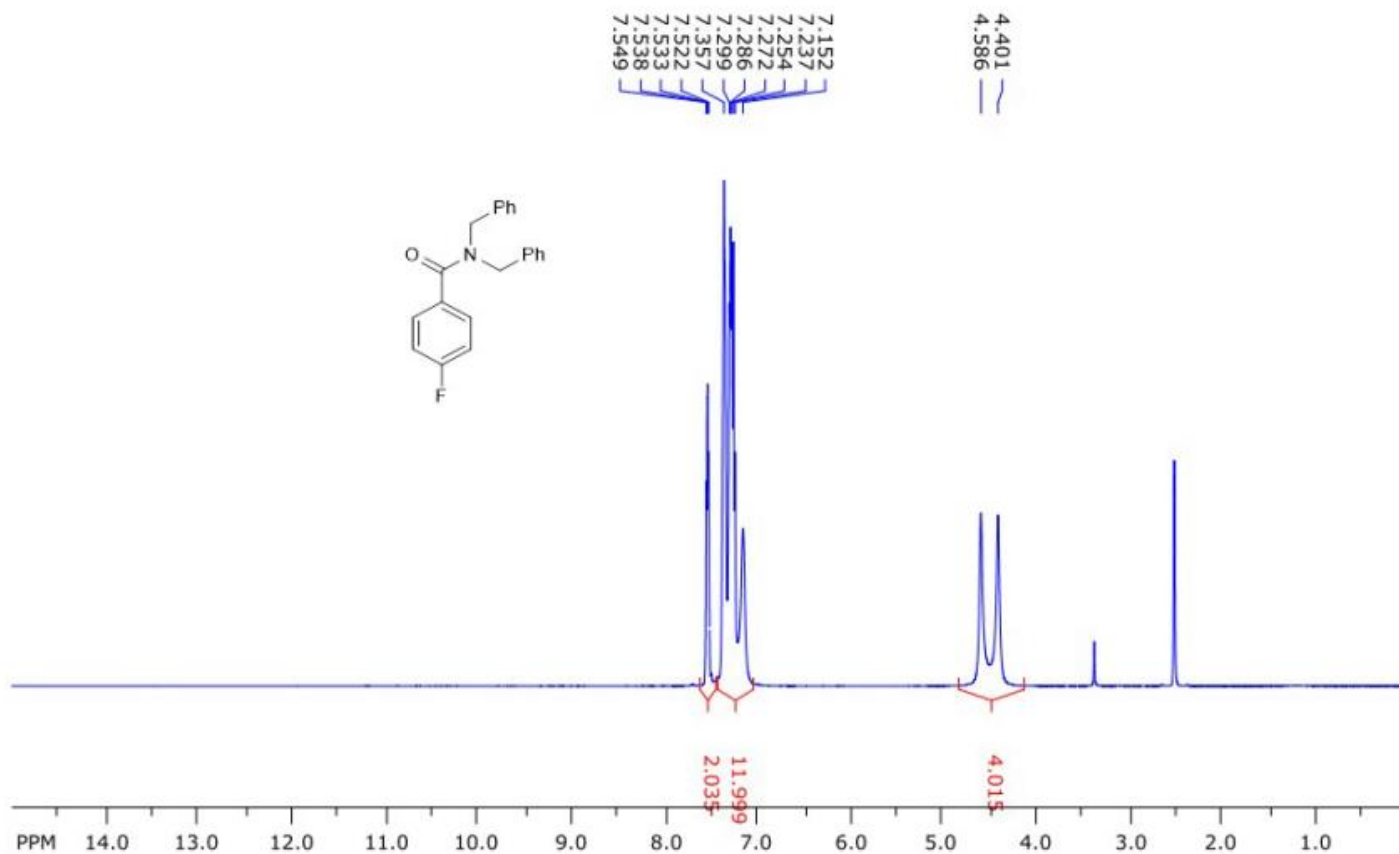

file: D:\NAPO\NMR\500-2\mkr11802\17\fid expt: <zg30>  
transmitter freq.: 500.133001 MHz  
time domain size: 65536 points  
width: 12335.53 Hz = 24.6645 ppm = 0.188225 Hz/pt  
number of scans: 24

freq. of 0 ppm: 500.130004 MHz  
processed size: 65536 complex points  
LB: 0.300 GF: 0.0000  
Hz/cm: 300.601 ppm/cm: 0.60104

# Compound 8

SpinWorks 4: IVA 1988 13C DMSO

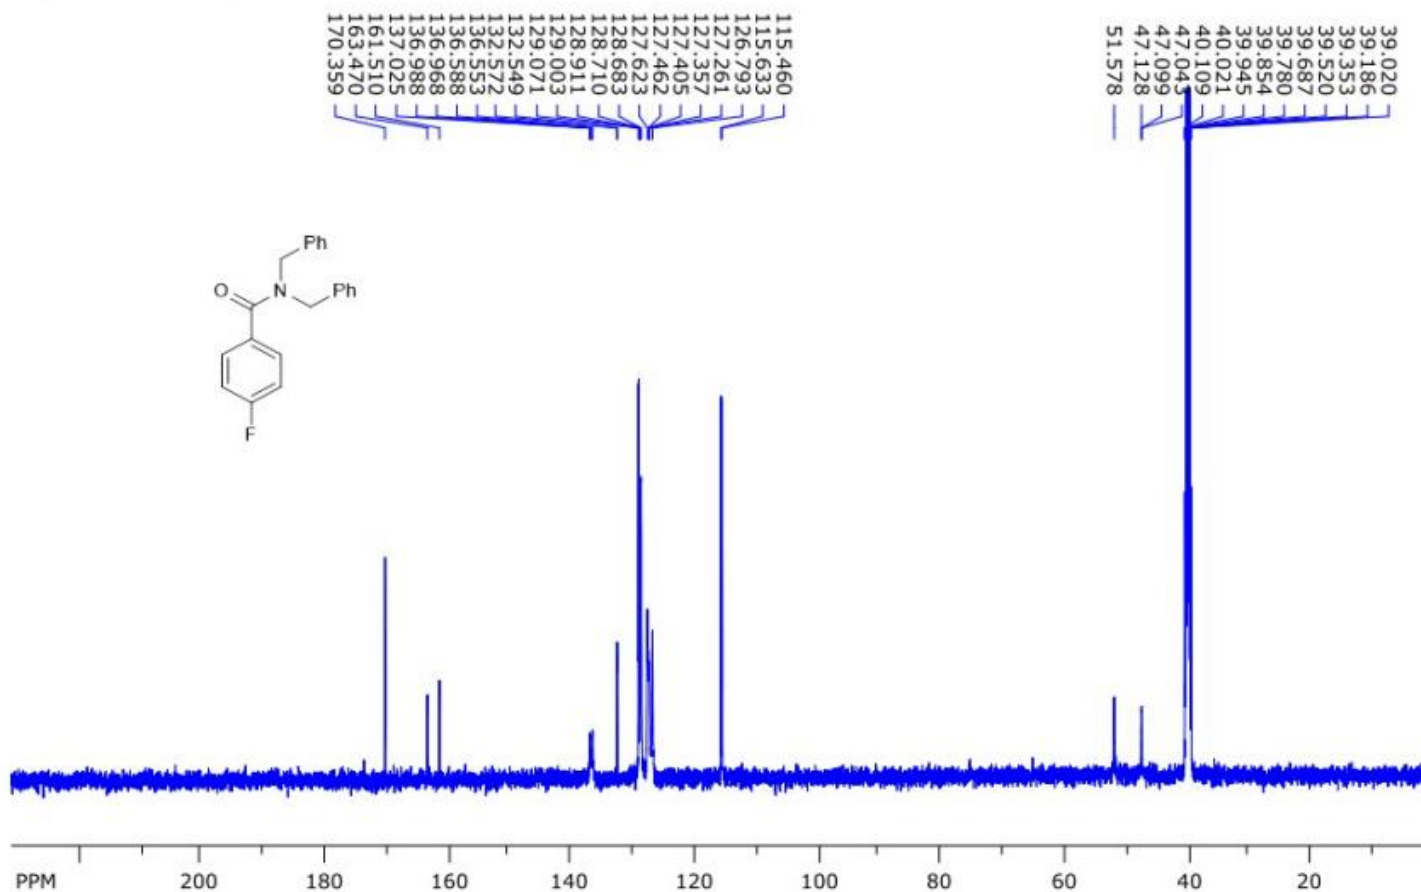

file: D:\NAPO\NMR\500-2\mkr11802\18\fid expt: <zpgg30>  
transmitter freq.: 125.772879 MHz  
time domain size: 65536 points  
width: 36057.69 Hz = 286.6889 ppm = 0.550197 Hz/pt  
number of scans: 512

freq. of 0 ppm: 125.757845 MHz  
processed size: 32768 complex points  
LB: 2.000 GF: 0.0000  
Hz/cm: 1161.939 ppm/cm: 9.23839
